# Supplementary material for: Caring Letters Sent by a Clinician or Peer to At-Risk Veterans: A Randomized Clinical Trial
Source: PubMed Central journal article supplement (PMC11059042; doi:10.1001/jamanetworkopen.2024.8064), 2024-04-29
Supplement: jamanetwopen-e248064-s001.pdf [file jamanetwopen-e248064-s001.pdf]

## Supplemental Online Content

Reger MA, Legler A, Lauver M. Caring letters sent by a clinician or peer to at-risk veterans: a randomized clinical trial. *JAMA Netw Open*. 2024;7(4):e248064.  
doi:10.1001/jamanetworkopen.2024.8064

### **eAppendix.** Description of Power Analyses

**eFigure 1.** CONSORT Diagram, Receipt of Any Letters vs No Letters Evaluation

**eFigure 2.** Visual Inspection of Proportional Hazards Assumptions

**eTable 1.** Power to Detect Differences in Suicide Attempt Incidence, Suicide Mortality, and VHA Mental Health Encounters in Pre-Post Comparison of Caring Contacts

**eTable 2.** Power to Detect Differences in Suicide Attempt Incidence, Suicide Mortality, and VHA Mental Health Encounters in Randomized Comparison of Two Versions of Caring Contacts

**eTable 3.** Descriptive Statistics by Caring Letters Signatory

**eTable 4.** Rates of All Outcomes for Peer-Provider Signatory Comparison

**eTable 5.** Average Incremental Effects From Logistic Regressions of Association Between Outcomes and Caring Letters Signatory

**eTable 6.** Average Incremental Effects From Logistic Regressions of Association Between Outcomes and Caring Letters Signatory in Sensitivity Analysis

**eTable 7.** Descriptive Statistics by Caring Letters Receipt

**eTable 8.** Rates of All Outcomes for Letters vs No Letters Comparison

**eTable 9.** Hazard Ratios From Time-to-Event Analyses of Association Between Outcomes and Caring Letters Receipt, Full Sample

**eTable 10.** Hazard Ratios From Time-to-Event Analyses of Association Between Outcomes and Caring Letters Receipt, Presumed Completers

**eTable 11.** Hazard Ratios From Time-to-Event Analyses of Association Between Outcomes and Caring Letters Receipt, Repeat Callers

### **eReferences.**

This supplemental material has been provided by the authors to give readers additional information about their work.

## Description of Power Analyses

If the sample included 90,000 VHA enrollees who call the VCL, the study would be powered to detect differences in suicide attempt incidence and engagement with VHA mental health care in both pre-post comparisons and in comparisons of two versions of caring contacts.

We assume that there are 90,000 VHA enrollees who call the VCL and who may receive caring contacts over a 1-year period. We assume we can identify 40,000 VHA enrollees who called the VCL in a one-year period before the caring contacts intervention began. Baseline estimates are based on previous analyses of VCL data (eTables 1 and 2).<sup>1</sup> We have 80% power to detect differences in outcomes listed in eTable 1 in a pre-post comparison of caring contacts when  $\alpha = .05$ . We have 80% power to detect differences in outcomes listed in eTable 2 across two versions of caring contacts when  $\alpha = .05$ .

**eFigure 1.** CONSORT Diagram, Receipt of Any Letters vs No Letters Evaluation

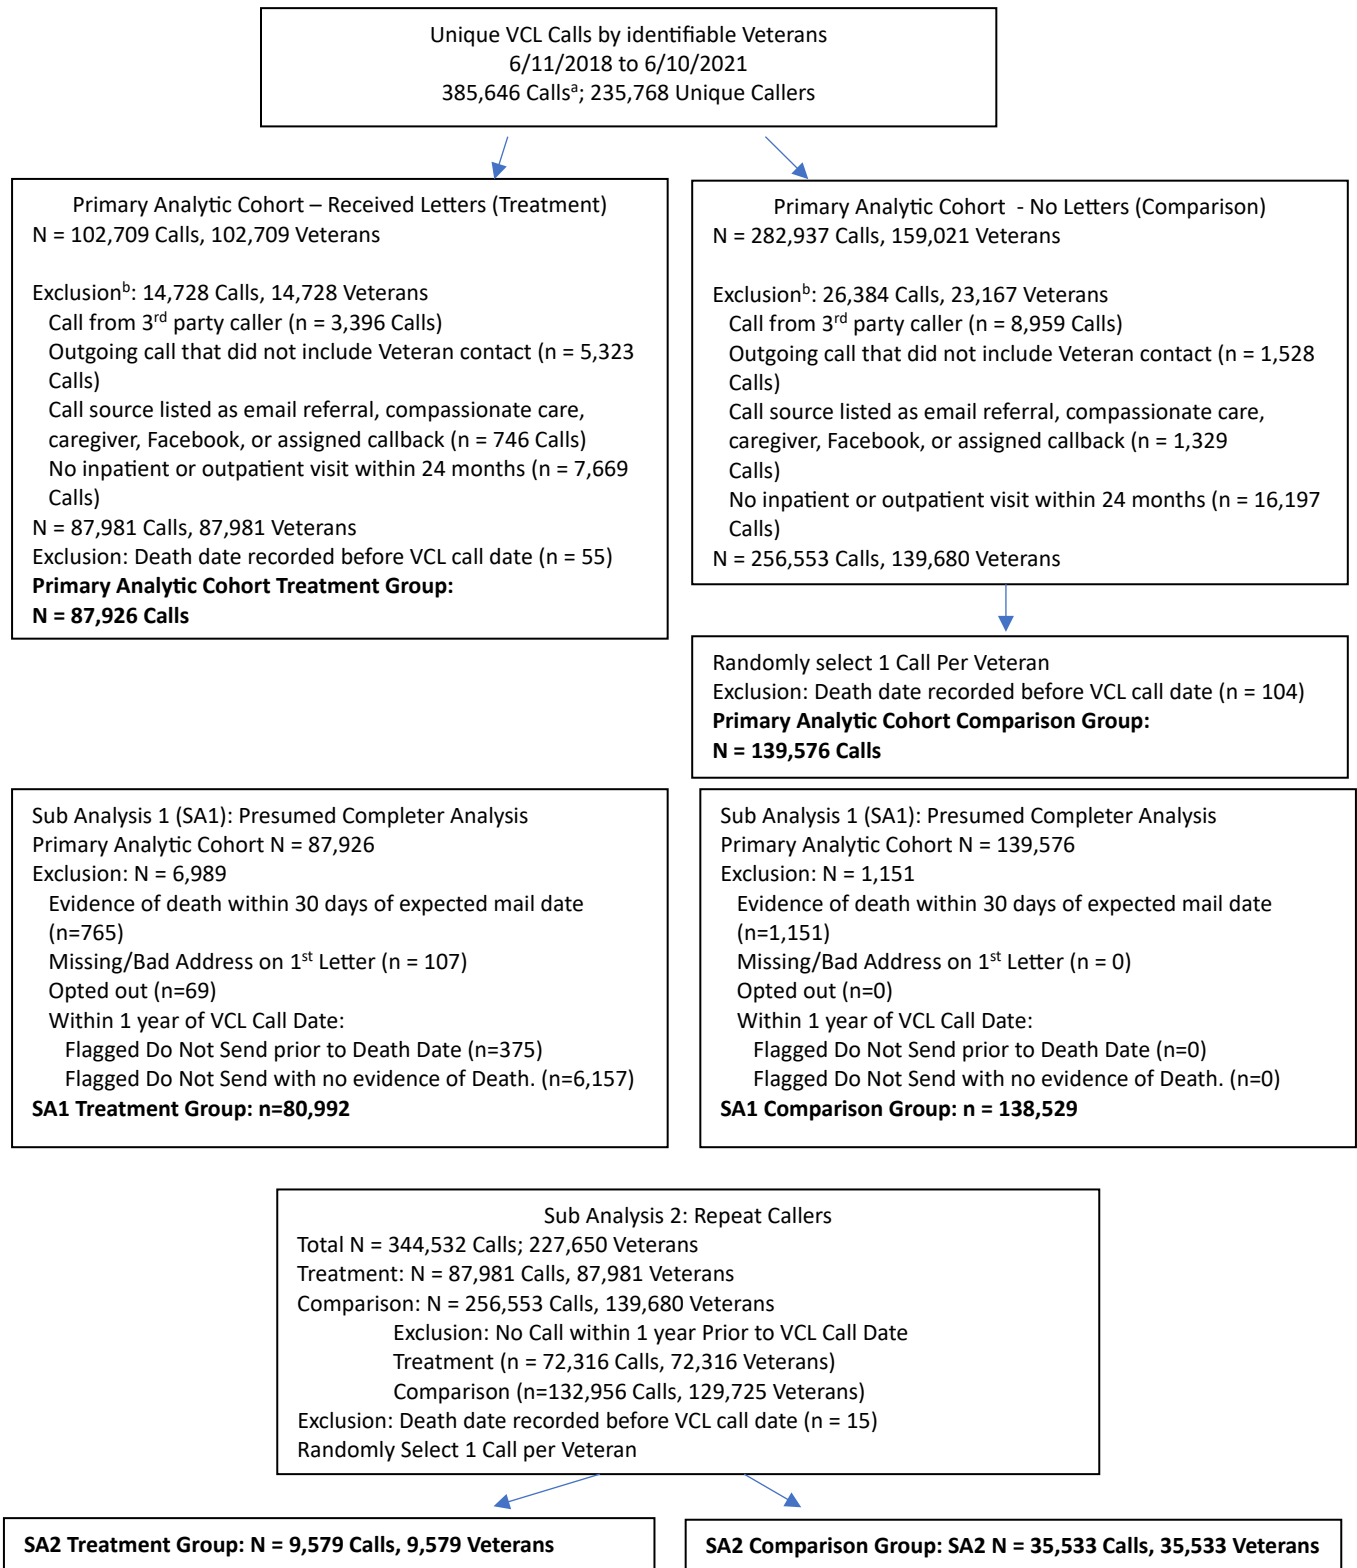

a) To create the pool of eligible calls for the comparison group, we dropped comparison calls after the index caring letters date for Veterans who are in the treatment group.

b) Exclusion categories not mutually exclusive.

**eFigure 2.** Visual Inspection of Proportional Hazards Assumptions

Visual inspection of time to events across treatment and comparison individuals support the proportional hazards assumption in our analyses of the association of receipt of letters with suicide attempt and utilization outcomes.

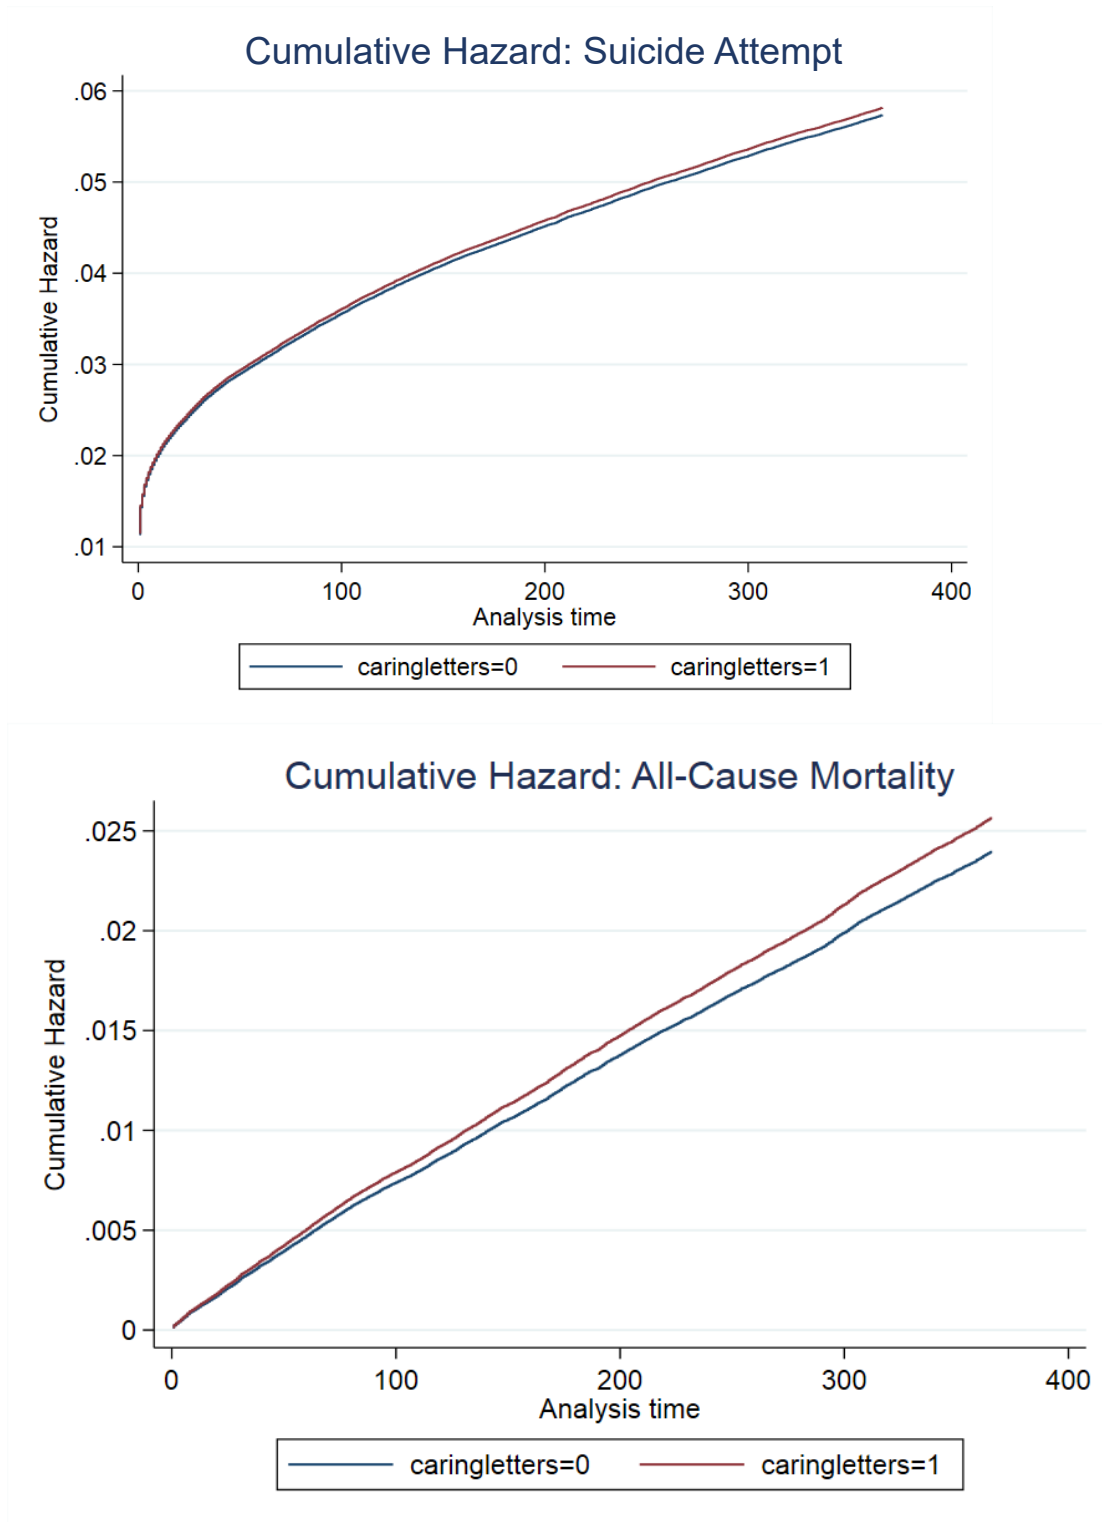

Cumulative Hazard: Outpatient

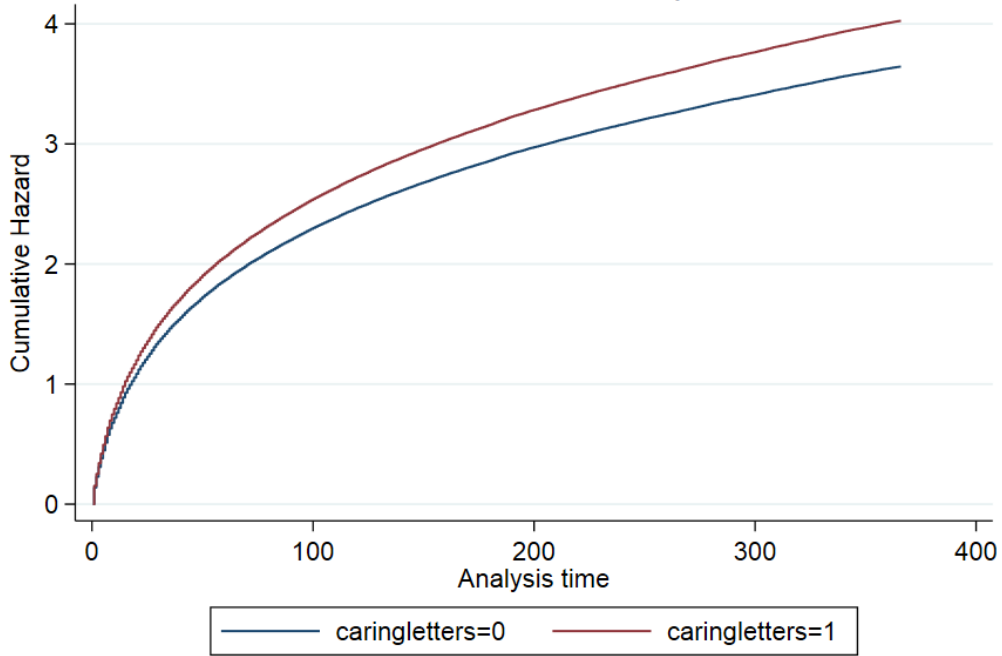

Cumulative Hazard: Outpatient Mental Health

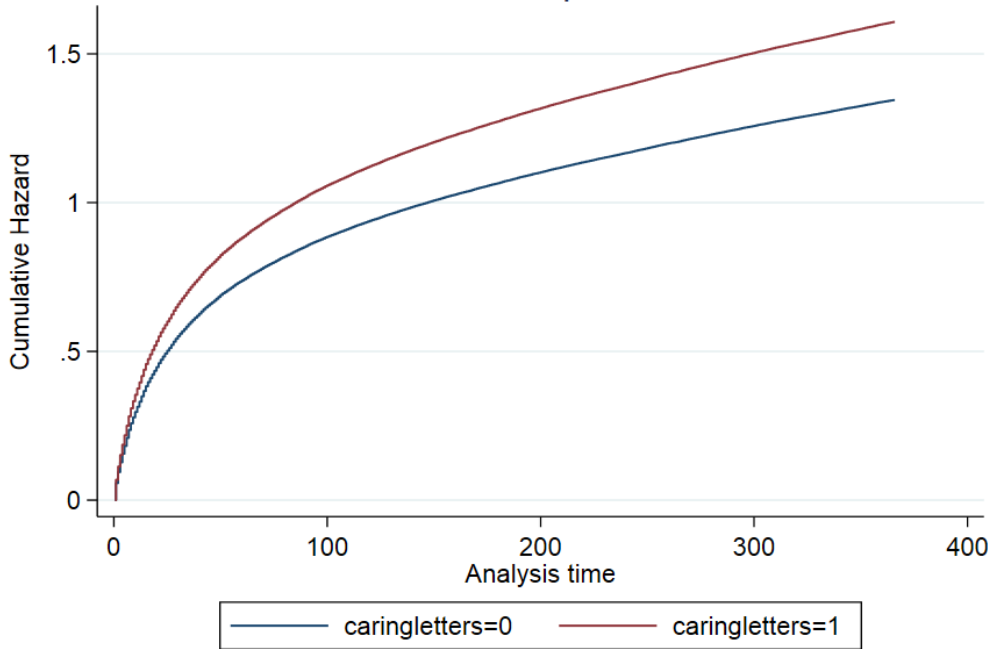

Cumulative Hazard: Inpatient

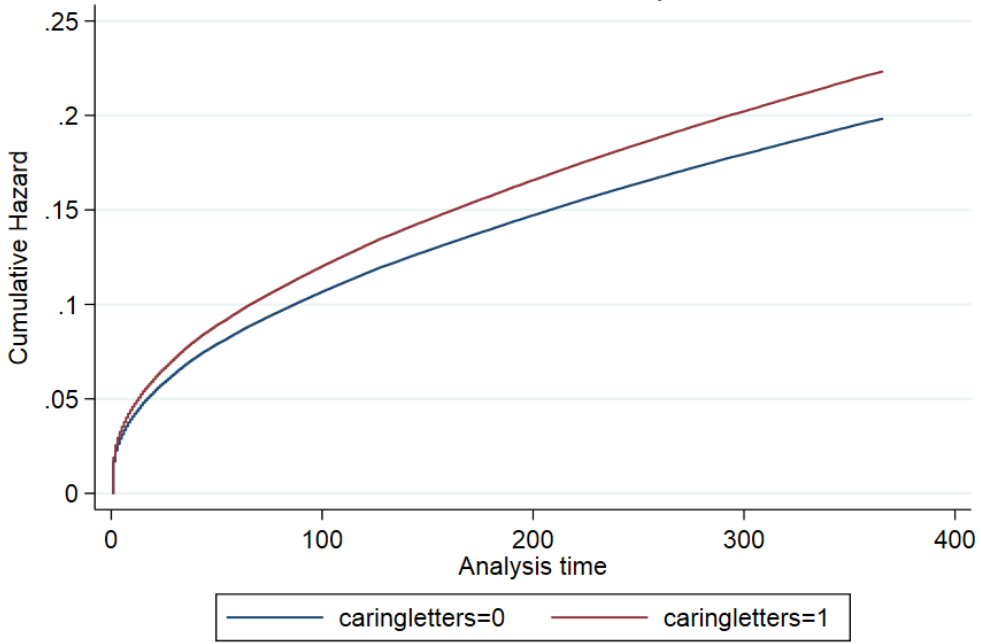

Cumulative Hazard: Inpatient Mental Health

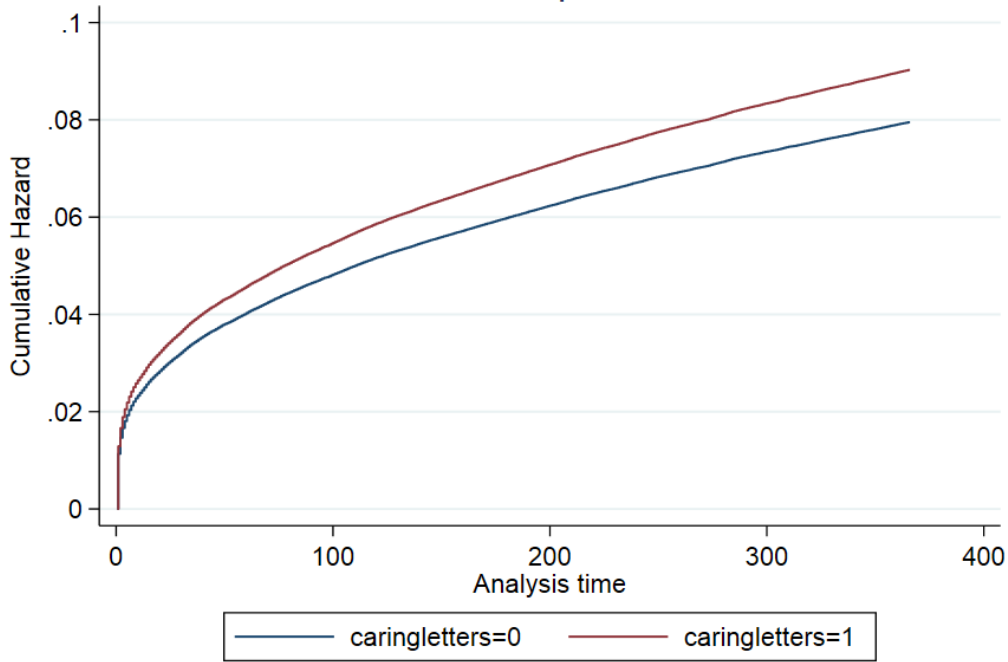

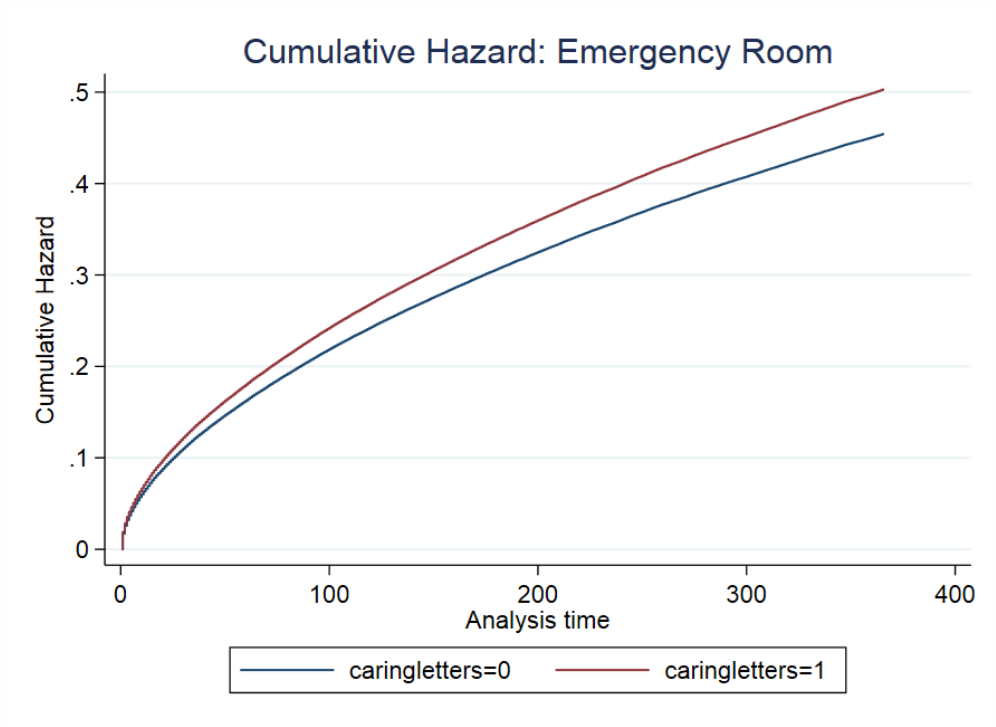

**eTable 1.** Power to Detect Differences in Suicide Attempt Incidence, Suicide Mortality, and VHA Mental Health Encounters in Pre-Post Comparison of Caring Contacts

| <b>Outcome</b>                                                   | <b>Relative difference</b> | <b>Absolute difference</b>                                                   |
|------------------------------------------------------------------|----------------------------|------------------------------------------------------------------------------|
| Suicide attempt incidence (rate per 100,000 person-years)        | 9.1%                       | Reduction from 3172 to 2883 per 100,000 person-years                         |
| Suicide mortality (rate per 100,000 person-years, entire sample) | 28.1%                      | Reduction from 301 to 216 per 100,000 person-years                           |
| VHA mental health encounter incidence                            | 1.2%                       | Increase from 68.6% to 69.4% of callers with an encounter in 12-month period |

**eTable 2.** Power to Detect Differences in Suicide Attempt Incidence, Suicide Mortality, and VHA Mental Health Encounters in Randomized Comparison of Two Versions of Caring Contacts

| <b>Outcome</b>                                                   | <b>Relative difference</b> | <b>Absolute difference</b>                                                                |
|------------------------------------------------------------------|----------------------------|-------------------------------------------------------------------------------------------|
| Suicide attempt incidence (rate per 100,000 person-years)        | 10.8%                      | Reduction from 2760 to 2462 per 100,000 person-years <sup>a</sup>                         |
| Suicide mortality (rate per 100,000 person-years, entire sample) | 33.0%                      | Reduction from 271 to 182 per 100,000 person-years <sup>b</sup>                           |
| VHA mental health encounter incidence                            | 1.06%                      | Increase from 75.5% to 76.3% of callers with an encounter in 12 month period <sup>c</sup> |

a) We assume that each arm has a 13% decrease in suicide attempt incidence relative to baseline.<sup>2</sup>

b) We assume that each arm has a 10% decrease in suicide attempt incidence relative to baseline

c) We assume that each arm has a 10% increase in encounter incidence relative to baseline



**eTable 3.** Descriptive Statistics by Caring letters Signatory

|                                               | Peer<br>(N=47,120) |         | Provider<br>(N=47,190) |         | Total<br>(N=94,310) |         | Std. diff. |
|-----------------------------------------------|--------------------|---------|------------------------|---------|---------------------|---------|------------|
|                                               | N or Mean          | % or SD | N or Mean              | % or SD | N or Mean           | % or SD |            |
| Age in years                                  | 53.77              | (17.31) | 53.80                  | (17.32) | 53.78               | (17.32) | -0.002     |
| Age at separation                             | 26.24              | (6.69)  | 26.23                  | (6.68)  | 26.23               | (6.68)  | 0.003      |
| Age group                                     |                    |         |                        |         |                     |         | 0.000      |
| Less than 40                                  | 12,924             | (27.43) | 12,930                 | (27.40) | 25,854              | (27.41) |            |
| 40-54                                         | 10,294             | (21.85) | 10,397                 | (22.03) | 20,691              | (21.94) |            |
| 55-64                                         | 9,644              | (20.47) | 9,517                  | (20.17) | 19,161              | (20.32) |            |
| 65-79                                         | 11,414             | (24.22) | 11,509                 | (24.39) | 22,923              | (24.31) |            |
| 80+                                           | 2,844              | (6.04)  | 2,835                  | (6.01)  | 5,679               | (6.02)  |            |
| Sex                                           |                    |         |                        |         |                     |         | -0.005     |
| Female                                        | 7,456              | (15.82) | 7,375                  | (15.63) | 14,831              | (15.73) |            |
| Male                                          | 39,649             | (84.14) | 39,801                 | (84.34) | 79,450              | (84.24) |            |
| Sex Missing                                   | 15                 | (0.03)  | 14                     | (0.03)  | 29                  | (0.03)  |            |
| Race                                          |                    |         |                        |         |                     |         | -0.001     |
| White                                         | 27,939             | (59.29) | 28,010                 | (59.36) | 55,949              | (59.32) |            |
| Black                                         | 12,271             | (26.04) | 12,224                 | (25.90) | 24,495              | (25.97) |            |
| Asian                                         | 542                | (1.15)  | 562                    | (1.19)  | 1,104               | (1.17)  |            |
| More Than One Race                            | 726                | (1.54)  | 708                    | (1.50)  | 1,434               | (1.52)  |            |
| American Indian or Alaska Native              | 507                | (1.08)  | 527                    | (1.12)  | 1,034               | (1.10)  |            |
| Native Hawaiian or Other Pacific Islander     | 473                | (1.00)  | 497                    | (1.05)  | 970                 | (1.03)  |            |
| Race Unknown                                  | 4,662              | (9.89)  | 4,662                  | (9.88)  | 9,324               | (9.89)  |            |
| Ethnicity                                     |                    |         |                        |         |                     |         | -0.002     |
| Hispanic                                      | 3,744              | (7.95)  | 3,646                  | (7.73)  | 7,390               | (7.84)  |            |
| Not Hispanic                                  | 39,465             | (83.75) | 39,690                 | (84.11) | 79,155              | (83.93) |            |
| Ethnicity Unknown                             | 3,911              | (8.30)  | 3,854                  | (8.17)  | 7,765               | (8.23)  |            |
| Marital status                                |                    |         |                        |         |                     |         | 0.003      |
| Married                                       | 16,822             | (35.70) | 16,957                 | (35.93) | 33,779              | (35.82) |            |
| Single/Never Married                          | 11,638             | (24.70) | 11,586                 | (24.55) | 23,224              | (24.63) |            |
| Divorced/Separated/Widowed                    | 17,495             | (37.13) | 17,461                 | (37.00) | 34,956              | (37.06) |            |
| Marital status unknown                        | 1,165              | (2.47)  | 1,186                  | (2.51)  | 2,351               | (2.49)  |            |
| Branch of service                             |                    |         |                        |         |                     |         | -0.002     |
| Air Force                                     | 5,999              | (12.73) | 5,948                  | (12.60) | 11,947              | (12.67) |            |
| Army                                          | 24,405             | (51.79) | 24,497                 | (51.91) | 48,902              | (51.85) |            |
| Navy                                          | 9,240              | (19.61) | 9,254                  | (19.61) | 18,494              | (19.61) |            |
| Marine Corps                                  | 6,131              | (13.01) | 6,131                  | (12.99) | 12,262              | (13.00) |            |
| Other and missing                             | 1,345              | (2.85)  | 1,360                  | (2.88)  | 2,705               | (2.87)  |            |
| Discharge type                                |                    |         |                        |         |                     |         | 0.003      |
| Honorable                                     | 41,946             | (89.02) | 42,051                 | (89.11) | 83,997              | (89.06) |            |
| Dishonorable                                  | 378                | (0.80)  | 376                    | (0.80)  | 754                 | (0.80)  |            |
| Other                                         | 3,543              | (7.52)  | 3,534                  | (7.49)  | 7,077               | (7.50)  |            |
| Unknown                                       | 1,253              | (2.66)  | 1,229                  | (2.60)  | 2,482               | (2.63)  |            |
| Past SRE                                      | 3,006              | (6.38)  | 2,978                  | (6.31)  | 5,984               | (6.35)  | 0.003      |
| Past IP MH                                    | 3,205              | (6.80)  | 3,222                  | (6.83)  | 6,427               | (6.81)  | -0.001     |
| Past OP MH                                    | 25,489             | (54.09) | 25,576                 | (54.20) | 51,065              | (54.15) | -0.002     |
| Acquired immune deficiency syndrome           | 413                | (0.88)  | 454                    | (0.96)  | 867                 | (0.92)  | -0.009     |
| Alcohol disorder                              | 12,067             | (25.61) | 12,063                 | (25.56) | 24,130              | (25.59) |            |
| Anemias due to other nutritional deficiencies | 5,106              | (10.84) | 4,991                  | (10.58) | 10,097              | (10.71) | 0.008      |
| Autoimmune conditions                         | 1,170              | (2.48)  | 1,147                  | (2.43)  | 2,317               | (2.46)  | 0.003      |
| Chronic blood loss (iron deficiency)          | 394                | (0.84)  | 385                    | (0.82)  | 779                 | (0.83)  | 0.002      |
| Leukemia                                      | 135                | (0.29)  | 136                    | (0.29)  | 271                 | (0.29)  | -0.000     |
| Lymphoma                                      | 228                | (0.48)  | 203                    | (0.43)  | 431                 | (0.46)  | 0.008      |
| Metastatic cancer                             | 263                | (0.56)  | 289                    | (0.61)  | 552                 | (0.59)  | -0.007     |
| Solid tumor without metastasis, in situ       | 1,261              | (2.68)  | 1,162                  | (2.46)  | 2,423               | (2.57)  | 0.005      |
| Solid tumor without metastasis, malignant     | 2,460              | (5.22)  | 2,411                  | (5.11)  | 4,871               | (5.16)  | 0.005      |
| Cerebrovascular disease - Primary             | 7,496              | (15.91) | 7,480                  | (15.85) | 14,976              | (15.88) | 0.002      |
| Cerebrovascular disease - Sequela             | 850                | (1.80)  | 853                    | (1.81)  | 1,703               | (1.81)  | -0.000     |

|                                               |        |         |        |         |        |         |        |
|-----------------------------------------------|--------|---------|--------|---------|--------|---------|--------|
| Coagulopathy                                  | 1,236  | (2.62)  | 1,269  | (2.69)  | 2,505  | (2.66)  | -0.004 |
| Dementia                                      | 1,288  | (2.73)  | 1,324  | (2.81)  | 2,612  | (2.77)  | -0.004 |
| Depression                                    | 24,590 | (52.19) | 24,680 | (52.30) | 49,270 | (52.24) | -0.002 |
| Diabetes with chronic complications           | 6,307  | (13.38) | 6,321  | (13.39) | 12,628 | (13.39) | -0.000 |
| Diabetes without chronic complications        | 8,344  | (17.71) | 8,299  | (17.59) | 16,643 | (17.65) | 0.003  |
| Drug use disorder                             | 9,916  | (21.04) | 9,852  | (20.88) | 19,768 | (20.96) | 0.004  |
| Fluid and electrolyte disorders               | 4,810  | (10.21) | 4,742  | (10.05) | 9,552  | (10.13) | 0.005  |
| Heart failure                                 | 2,731  | (5.80)  | 2,679  | (5.68)  | 5,410  | (5.74)  | 0.005  |
| Homeless                                      | 7,465  | (15.84) | 7,456  | (15.80) | 14,921 | (15.82) | 0.001  |
| Hypertension, complicated                     | 3,674  | (7.80)  | 3,686  | (7.81)  | 7,360  | (7.80)  | -0.001 |
| Hypertension, uncomplicated                   | 19,320 | (41.00) | 19,170 | (40.62) | 38,490 | (40.81) | 0.008  |
| Liver disease, mild                           | 4,032  | (8.56)  | 4,092  | (8.67)  | 8,124  | (8.61)  | -0.004 |
| Liver disease and failure, moderate to severe | 370    | (0.79)  | 393    | (0.83)  | 763    | (0.81)  | -0.005 |
| Liver disease                                 | 49     | (0.10)  | 57     | (0.12)  | 106    | (0.11)  | -0.005 |
| Chronic pulmonary disease                     | 7,623  | (16.18) | 7,697  | (16.31) | 15,320 | (16.24) | -0.004 |
| Neurological disorders affecting movement     | 1,425  | (3.02)  | 1,446  | (3.06)  | 2,871  | (3.04)  | -0.002 |
| Other neurological disorders                  | 2,708  | (5.75)  | 2,769  | (5.87)  | 5,477  | (5.81)  | -0.005 |
| Seizures and epilepsy                         | 1,644  | (3.49)  | 1,618  | (3.43)  | 3,262  | (3.46)  | 0.003  |
| Obesity                                       | 9,050  | (19.21) | 9,225  | (19.55) | 18,275 | (19.38) | -0.009 |
| Paralysis                                     | 687    | (1.46)  | 679    | (1.44)  | 1,366  | (1.45)  | 0.002  |
| Peripheral vascular disease                   | 3,298  | (7.00)  | 3,315  | (7.02)  | 6,613  | (7.01)  | -0.001 |
| Psychoses                                     | 12,169 | (25.83) | 12,305 | (26.08) | 24,474 | (25.95) | -0.006 |
| Pulmonary circulation disease                 | 736    | (1.56)  | 762    | (1.61)  | 1,498  | (1.59)  | -0.004 |
| Renal (kidney) failure and disease, moderate  | 2,659  | (5.64)  | 2,661  | (5.64)  | 5,320  | (5.64)  | 0.000  |
| Renal (kidney) failure and disease, severe    | 589    | (1.25)  | 557    | (1.18)  | 1,146  | (1.22)  | 0.006  |
| Renal failure                                 | 687    | (1.46)  | 681    | (1.44)  | 1,368  | (1.45)  | 0.001  |
| Hypothyroidism                                | 3,034  | (6.44)  | 3,095  | (6.56)  | 6,129  | (6.50)  | -0.005 |
| Other thyroid disorders                       | 903    | (1.92)  | 790    | (1.67)  | 1,693  | (1.80)  | 0.018  |
| Peptic ulcer with bleeding                    | 436    | (0.93)  | 450    | (0.95)  | 886    | (0.94)  | -0.003 |
| Valvular disease                              | 1,181  | (2.51)  | 1,189  | (2.52)  | 2,370  | (2.51)  | -0.001 |
| Weight loss                                   | 2,004  | (4.25)  | 1,989  | (4.21)  | 3,993  | (4.23)  | 0.002  |

**eTable 4.** Rates of all Outcomes for Peer-Provider Signatory Comparison

| Outcome (one year forward)                                    | Total Sample<br>(N=94,310) | Peer Signatory<br>(N=47,120) | Provider Signatory<br>(N=47,190) | P-value <sup>†</sup> |
|---------------------------------------------------------------|----------------------------|------------------------------|----------------------------------|----------------------|
| <b>Any Nonfatal suicide attempt and intentional self-harm</b> |                            |                              |                                  |                      |
| At least one event, n (%)                                     | 7,056 (7.48)               | 3,489 (7.40)                 | 3,567 (7.56)                     | 0.368                |
| Frequency, Mean (std. dev)                                    | 0.21 (1.52)                | 0.20 (1.53)                  | 0.21 (1.52)                      | 0.372                |
| <b>All-cause mortality</b>                                    |                            |                              |                                  |                      |
| All-cause mortality, n (%)                                    | 3,528 (3.74)               | 1,777 (3.77)                 | 1,751 (3.71)                     | 0.623                |
| <b>Any outpatient utilization</b>                             |                            |                              |                                  |                      |
| At least one visit, n (%)                                     | 87,558 (92.84)             | 43,725 (92.79)               | 43,833 (92.89)                   | 0.587                |
| Visit count, mean (std. dev)                                  | 22.20 (22.84)              | 22.25 (0.484)                | 22.15 (22.80)                    | 0.818                |
| <b>Outpatient mental health utilization</b>                   |                            |                              |                                  |                      |
| At least one visit, n (%)                                     | 64,830 (68.74)             | 32,494 (68.96)               | 32,336 (68.52)                   | 0.148                |
| Visit count, mean (std. dev)                                  | 8.71 (15.26)               | 8.69 (15.09)                 | 8.74 (15.43)                     | 0.481                |
| <b>Any inpatient utilization</b>                              |                            |                              |                                  |                      |
| At least one visit, n (%)                                     | 19,184 (20.34)             | 9,555 (20.28)                | 9,629 (20.40)                    | 0.629                |
| Visit count, mean (std. dev)                                  | 0.46 (1.33)                | 0.46 (1.31)                  | 0.46 (1.35)                      | 0.795                |
| <b>Inpatient mental health utilization</b>                    |                            |                              |                                  |                      |
| At least one visit, n (%)                                     | 9,794 (10.38)              | 4,855 (10.30)                | 4,939 (10.47)                    | 0.413                |
| Visit count, mean (std. dev)                                  | 0.18 (0.70)                | 0.17 (0.70)                  | 0.18 (0.70)                      | 0.426                |
| <b>Emergency department utilization</b>                       |                            |                              |                                  |                      |
| At least one visit, n (%)                                     | 35,227 (37.35)             | 17,653 (37.46)               | 17,574 (37.24)                   | 0.479                |
| Visit count, mean (std. dev)                                  | 1.60 (3.71)                | 1.62 (3.71)                  | 1.59 (3.72)                      | 0.546                |

Notes: <sup>†</sup>Chi-squared test was used for categorical variables, Wilcoxon rank-sum test was used for frequencies.

**eTable 5.** Average Incremental Effects From Logistic Regressions of Association between Outcomes and Caring Letters Signatory

| VARIABLES                                 | All-Cause Mortality            | Suicide Attempt                | Outpatient Care                | Outpatient Mental Health Care  | Inpatient Care                 | Inpatient Mental Health Care   | Emergency Department Use       |
|-------------------------------------------|--------------------------------|--------------------------------|--------------------------------|--------------------------------|--------------------------------|--------------------------------|--------------------------------|
| Randomization type (ref. Peer)            | -0.001<br>(-0.003 - 0.002)     | 0.001<br>(-0.002 - 0.005)      | 0.001<br>(-0.002 - 0.003)      | -0.004<br>(-0.009 - 0.001)     | 0.001<br>(-0.003 - 0.006)      | 0.001<br>(-0.003 - 0.005)      | -0.002<br>(-0.008 - 0.004)     |
|                                           | 0.518                          | 0.389                          | 0.678                          | 0.105                          | 0.601                          | 0.581                          | 0.501                          |
| Age in years                              | 0.002***<br>(0.001 - 0.002)    | -0.002***<br>(-0.002 - -0.001) | -0.000***<br>(-0.001 - -0.000) | -0.005***<br>(-0.006 - -0.005) | -0.000***<br>(-0.001 - -0.000) | -0.001***<br>(-0.001 - -0.001) | -0.002***<br>(-0.002 - -0.002) |
|                                           | 0.000                          | 0.000                          | 0.000                          | 0.000                          | 0.000                          | 0.000                          | 0.000                          |
| Female sex                                | -0.015***<br>(-0.019 - -0.011) | -0.004*<br>(-0.008 - 0.000)    | 0.008***<br>(0.004 - 0.012)    | 0.034***<br>(0.026 - 0.042)    | -0.030***<br>(-0.037 - -0.024) | -0.018***<br>(-0.023 - -0.013) | -0.007<br>(-0.015 - 0.001)     |
|                                           | 0.000                          | 0.078                          | 0.000                          | 0.000                          | 0.000                          | 0.000                          | 0.107                          |
| Race (ref. White)                         |                                |                                |                                |                                |                                |                                |                                |
| Black                                     | -0.012***<br>(-0.015 - -0.009) | -0.011***<br>(-0.015 - -0.007) | 0.007***<br>(0.003 - 0.010)    | 0.013***<br>(0.007 - 0.020)    | -0.002<br>(-0.008 - 0.004)     | 0.003<br>(-0.002 - 0.007)      | 0.054***<br>(0.046 - 0.061)    |
|                                           | 0.000                          | 0.000                          | 0.000                          | 0.000                          | 0.500                          | 0.292                          | 0.000                          |
| Asian                                     | -0.014**<br>(-0.026 - -0.002)  | 0.000<br>(-0.014 - 0.015)      | 0.015***<br>(0.005 - 0.026)    | -0.025**<br>(-0.049 - -0.000)  | -0.020*<br>(-0.043 - 0.004)    | -0.005<br>(-0.022 - 0.013)     | -0.005<br>(-0.032 - 0.022)     |
|                                           | 0.020                          | 0.953                          | 0.005                          | 0.049                          | 0.097                          | 0.614                          | 0.712                          |
| More Than One Race                        | -0.016***<br>(-0.026 - -0.007) | -0.010<br>(-0.021 - 0.002)     | 0.002<br>(-0.009 - 0.013)      | -0.000<br>(-0.022 - 0.022)     | -0.008<br>(-0.027 - 0.012)     | -0.007<br>(-0.021 - 0.007)     | 0.013<br>(-0.010 - 0.037)      |
|                                           | 0.001                          | 0.116                          | 0.719                          | 0.978                          | 0.446                          | 0.300                          | 0.271                          |
| American Indian or Alaska Native          | 0.004<br>(-0.010 - 0.018)      | 0.007<br>(-0.008 - 0.022)      | -0.002<br>(-0.015 - 0.012)     | -0.010<br>(-0.035 - 0.016)     | 0.016<br>(-0.007 - 0.039)      | -0.009<br>(-0.025 - 0.007)     | 0.009<br>(-0.018 - 0.037)      |
|                                           | 0.596                          | 0.339                          | 0.821                          | 0.457                          | 0.173                          | 0.295                          | 0.514                          |
| Native Hawaiian or Other Pacific Islander | -0.013**<br>(-0.024 - -0.002)  | 0.001<br>(-0.015 - 0.017)      | 0.019***<br>(0.007 - 0.031)    | 0.028**<br>(0.003 - 0.053)     | -0.013<br>(-0.037 - 0.011)     | -0.004<br>(-0.023 - 0.014)     | 0.020<br>(-0.009 - 0.050)      |
|                                           | 0.018                          | 0.931                          | 0.002                          | 0.028                          | 0.285                          | 0.654                          | 0.182                          |
| Race Unknown                              | -0.001<br>(-0.007 - 0.004)     | -0.006*<br>(-0.012 - 0.000)    | -0.014***<br>(-0.020 - -0.009) | -0.015***<br>(-0.026 - -0.005) | -0.007<br>(-0.017 - 0.003)     | -0.003<br>(-0.011 - 0.005)     | 0.003<br>(-0.009 - 0.014)      |
|                                           | 0.647                          | 0.057                          | 0.000                          | 0.004                          | 0.175                          | 0.442                          | 0.665                          |
| Ethnicity (ref. Not Hispanic)             |                                |                                |                                |                                |                                |                                |                                |
| Hispanic                                  | -0.006**<br>(-0.011 - -0.001)  | 0.004<br>(-0.003 - 0.010)      | 0.009***<br>(0.004 - 0.014)    | 0.012**<br>(0.002 - 0.023)     | -0.008*<br>(-0.018 - 0.001)    | -0.008**<br>(-0.015 - -0.000)  | 0.022***<br>(0.010 - 0.034)    |
|                                           | 0.012                          | 0.260                          | 0.001                          | 0.023                          | 0.097                          | 0.036                          | 0.000                          |
| Ethnicity Unknown                         | 0.004<br>(-0.003 - 0.010)      | 0.007*<br>(-0.001 - 0.014)     | -0.012***<br>(-0.017 - -0.007) | 0.004<br>(-0.007 - 0.015)      | 0.003<br>(-0.009 - 0.015)      | 0.005<br>(-0.004 - 0.014)      | -0.010<br>(-0.023 - 0.003)     |
|                                           | 0.252                          | 0.078                          | 0.000                          | 0.438                          | 0.618                          | 0.256                          | 0.142                          |
| Marital Status (ref. Married)             |                                |                                |                                |                                |                                |                                |                                |
| Single/Never Married                      | 0.008***<br>(0.004 - 0.011)    | -0.003<br>(-0.007 - 0.001)     | -0.006***<br>(-0.010 - -0.002) | -0.013***<br>(-0.020 - -0.006) | 0.030***<br>(0.023 - 0.036)    | 0.011***<br>(0.006 - 0.016)    | 0.046***<br>(0.038 - 0.054)    |
|                                           | 0.000                          | 0.192                          | 0.003                          | 0.000                          | 0.000                          | 0.000                          | 0.000                          |
| Divorced/Separated/<br>Widowed            | 0.008***<br>(0.005 - 0.011)    | 0.002<br>(-0.002 - 0.006)      | -0.000<br>(-0.004 - 0.003)     | -0.001<br>(-0.007 - 0.005)     | 0.033***<br>(0.027 - 0.038)    | 0.011***<br>(0.007 - 0.016)    | 0.048***<br>(0.041 - 0.055)    |
|                                           | 0.000                          | 0.336                          | 0.940                          | 0.773                          | 0.000                          | 0.000                          | 0.000                          |
| Marital Status Unknown                    | 0.002                          | -0.004                         | -0.033***                      | -0.070***                      | -0.061***                      | -0.036***                      | -0.107***                      |

|                                                     |                   |                  |                   |                   |                   |                   |                   |
|-----------------------------------------------------|-------------------|------------------|-------------------|-------------------|-------------------|-------------------|-------------------|
|                                                     | (-0.009 - 0.014)  | (-0.016 - 0.008) | (-0.042 - -0.025) | (-0.089 - -0.051) | (-0.081 - -0.042) | (-0.049 - -0.022) | (-0.130 - -0.084) |
|                                                     | 0.678             | 0.512            | 0.000             | 0.000             | 0.000             | 0.000             | 0.000             |
| Age at Separation Quartile (ref. quartile 1)        |                   |                  |                   |                   |                   |                   |                   |
| Quartile 2                                          | 0.001             | -0.003           | 0.000             | -0.001            | 0.001             | -0.002            | -0.008*           |
|                                                     | (-0.002 - 0.004)  | (-0.008 - 0.002) | (-0.004 - 0.004)  | (-0.008 - 0.006)  | (-0.005 - 0.008)  | (-0.007 - 0.003)  | (-0.016 - 0.001)  |
| Quartile 3                                          | 0.465             | 0.218            | 0.810             | 0.796             | 0.734             | 0.375             | 0.068             |
|                                                     | -0.001            | -0.003           | 0.001             | 0.009**           | 0.003             | -0.000            | -0.002            |
|                                                     | (-0.004 - 0.003)  | (-0.008 - 0.001) | (-0.003 - 0.005)  | (0.001 - 0.016)   | (-0.004 - 0.010)  | (-0.006 - 0.005)  | (-0.010 - 0.006)  |
| Quartile 4                                          | 0.746             | 0.158            | 0.538             | 0.024             | 0.408             | 0.867             | 0.612             |
|                                                     | -0.001            | -0.003           | 0.009***          | 0.029***          | -0.002            | -0.000            | -0.013***         |
|                                                     | (-0.004 - 0.003)  | (-0.008 - 0.002) | (0.005 - 0.013)   | (0.021 - 0.036)   | (-0.009 - 0.005)  | (-0.006 - 0.005)  | (-0.021 - -0.004) |
|                                                     | 0.681             | 0.223            | 0.000             | 0.000             | 0.515             | 0.900             | 0.003             |
| Military Branch (ref. Army)                         |                   |                  |                   |                   |                   |                   |                   |
| Air Force                                           | -0.000            | 0.002            | 0.002             | 0.009**           | -0.006*           | -0.000            | -0.001            |
|                                                     | (-0.004 - 0.003)  | (-0.003 - 0.007) | (-0.003 - 0.006)  | (0.001 - 0.017)   | (-0.014 - 0.001)  | (-0.006 - 0.006)  | (-0.010 - 0.008)  |
| Navy                                                | 0.861             | 0.433            | 0.440             | 0.024             | 0.095             | 0.973             | 0.903             |
|                                                     | -0.002            | 0.003            | -0.002            | 0.011***          | 0.002             | 0.001             | 0.005             |
|                                                     | (-0.005 - 0.001)  | (-0.001 - 0.007) | (-0.006 - 0.002)  | (0.004 - 0.017)   | (-0.004 - 0.009)  | (-0.004 - 0.005)  | (-0.003 - 0.012)  |
| Marine Corps                                        | 0.197             | 0.185            | 0.297             | 0.002             | 0.443             | 0.804             | 0.241             |
|                                                     | -0.001            | 0.002            | 0.002             | 0.003             | 0.001             | -0.001            | -0.006            |
|                                                     | (-0.005 - 0.003)  | (-0.003 - 0.007) | (-0.002 - 0.006)  | (-0.005 - 0.010)  | (-0.006 - 0.008)  | (-0.006 - 0.005)  | (-0.015 - 0.003)  |
| Other or missing                                    | 0.533             | 0.370            | 0.320             | 0.526             | 0.791             | 0.793             | 0.200             |
|                                                     | -0.004            | 0.001            | -0.003            | 0.016             | 0.002             | -0.002            | -0.002            |
|                                                     | (-0.014 - 0.007)  | (-0.015 - 0.016) | (-0.016 - 0.010)  | (-0.008 - 0.039)  | (-0.020 - 0.025)  | (-0.019 - 0.016)  | (-0.030 - 0.025)  |
|                                                     | 0.469             | 0.931            | 0.635             | 0.186             | 0.844             | 0.859             | 0.869             |
| Discharge Type (ref. Honorable)                     |                   |                  |                   |                   |                   |                   |                   |
| Dishonorable                                        | 0.008             | 0.006            | -0.015***         | -0.021            | 0.010             | 0.010             | 0.031             |
|                                                     | (-0.010 - 0.026)  | (-0.014 - 0.026) | (-0.026 - -0.004) | (-0.050 - 0.007)  | (-0.022 - 0.042)  | (-0.014 - 0.033)  | (-0.006 - 0.069)  |
| Other                                               | 0.377             | 0.550            | 0.009             | 0.144             | 0.549             | 0.414             | 0.105             |
|                                                     | 0.008***          | 0.007**          | -0.008***         | -0.005            | 0.013***          | 0.010***          | 0.014**           |
|                                                     | (0.002 - 0.015)   | (0.001 - 0.012)  | (-0.013 - -0.003) | (-0.015 - 0.006)  | (0.004 - 0.023)   | (0.003 - 0.016)   | (0.003 - 0.026)   |
| Unknown                                             | 0.008             | 0.025            | 0.002             | 0.360             | 0.005             | 0.005             | 0.012             |
|                                                     | 0.009             | 0.009            | 0.001             | -0.002            | -0.002            | -0.001            | 0.012             |
|                                                     | (-0.005 - 0.023)  | (-0.009 - 0.027) | (-0.012 - 0.014)  | (-0.028 - 0.024)  | (-0.027 - 0.022)  | (-0.021 - 0.018)  | (-0.019 - 0.042)  |
|                                                     | 0.207             | 0.323            | 0.854             | 0.893             | 0.844             | 0.906             | 0.455             |
| Any inpatient mental health stay in the past year   | 0.000             | 0.024***         | -0.023***         | 0.055***          | 0.116***          | 0.110***          | 0.105***          |
|                                                     | (-0.005 - 0.006)  | (0.018 - 0.030)  | (-0.039 - -0.007) | (0.039 - 0.072)   | (0.104 - 0.127)   | (0.101 - 0.119)   | (0.091 - 0.119)   |
|                                                     | 0.927             | 0.000            | 0.005             | 0.000             | 0.000             | 0.000             | 0.000             |
| Any outpatient mental health visit in the past year | -0.006***         | 0.012***         | 0.048***          | 0.214***          | 0.019***          | 0.024***          | 0.059***          |
|                                                     | (-0.009 - -0.003) | (0.008 - 0.016)  | (0.045 - 0.052)   | (0.207 - 0.221)   | (0.013 - 0.025)   | (0.019 - 0.029)   | (0.051 - 0.066)   |
|                                                     | 0.000             | 0.000            | 0.000             | 0.000             | 0.000             | 0.000             | 0.000             |
| Any SRE in the past year                            | 0.001             | 0.197***         | 0.041***          | 0.147***          | 0.103***          | 0.076***          | 0.061***          |
|                                                     | (-0.005 - 0.007)  | (0.186 - 0.207)  | (0.036 - 0.046)   | (0.135 - 0.160)   | (0.092 - 0.114)   | (0.068 - 0.084)   | (0.049 - 0.074)   |
|                                                     | 0.694             | 0.000            | 0.000             | 0.000             | 0.000             | 0.000             | 0.000             |
| Elixhauser comorbidities                            |                   |                  |                   |                   |                   |                   |                   |
| Acquired immune deficiency syndrome                 | -0.012**          | 0.010            | 0.030***          | 0.006             | 0.024**           | 0.010             | 0.074***          |
|                                                     | (-0.021 - -0.002) | (-0.007 - 0.026) | (0.013 - 0.047)   | (-0.022 - 0.035)  | (0.001 - 0.047)   | (-0.007 - 0.027)  | (0.043 - 0.105)   |

|                                               |                             |                               |                                |                                |                             |                                |                             |
|-----------------------------------------------|-----------------------------|-------------------------------|--------------------------------|--------------------------------|-----------------------------|--------------------------------|-----------------------------|
|                                               | 0.021                       | 0.249                         | 0.000                          | 0.670                          | 0.044                       | 0.231                          | 0.000                       |
| Alcohol disorder                              | 0.010***<br>(0.006 - 0.013) | 0.016***<br>(0.011 - 0.020)   | 0.008***<br>(0.003 - 0.013)    | 0.026***<br>(0.018 - 0.033)    | 0.067***<br>(0.060 - 0.074) | 0.028***<br>(0.024 - 0.033)    | 0.031***<br>(0.024 - 0.039) |
|                                               | 0.000                       | 0.000                         | 0.001                          | 0.000                          | 0.000                       | 0.000                          | 0.000                       |
| Anemias due to other nutritional deficiencies | 0.003*<br>(-0.000 - 0.006)  | 0.000<br>(-0.006 - 0.006)     | 0.018***<br>(0.010 - 0.025)    | -0.008*<br>(-0.018 - 0.001)    | 0.015***<br>(0.008 - 0.023) | -0.004<br>(-0.010 - 0.002)     | 0.020***<br>(0.009 - 0.030) |
|                                               | 0.091                       | 0.955                         | 0.000                          | 0.089                          | 0.000                       | 0.201                          | 0.000                       |
| Autoimmune conditions                         | -0.002<br>(-0.008 - 0.005)  | -0.000<br>(-0.011 - 0.010)    | 0.028***<br>(0.015 - 0.040)    | 0.013<br>(-0.004 - 0.030)      | 0.019**<br>(0.004 - 0.034)  | -0.003<br>(-0.014 - 0.008)     | 0.058***<br>(0.039 - 0.077) |
|                                               | 0.607                       | 0.961                         | 0.000                          | 0.130                          | 0.011                       | 0.578                          | 0.000                       |
| Chronic blood loss (iron deficiency)          | 0.007<br>(-0.003 - 0.017)   | -0.002<br>(-0.020 - 0.015)    | -0.006<br>(-0.042 - 0.030)     | -0.002<br>(-0.032 - 0.028)     | 0.020<br>(-0.005 - 0.044)   | -0.010<br>(-0.028 - 0.008)     | 0.015<br>(-0.018 - 0.047)   |
|                                               | 0.156                       | 0.817                         | 0.745                          | 0.894                          | 0.118                       | 0.290                          | 0.380                       |
| Leukemia                                      | 0.016*<br>(-0.002 - 0.034)  | -0.026*<br>(-0.058 - 0.005)   | 0.027<br>(-0.006 - 0.060)      | -0.005<br>(-0.050 - 0.040)     | 0.005<br>(-0.037 - 0.046)   | -0.041***<br>(-0.071 - -0.010) | 0.031<br>(-0.023 - 0.085)   |
|                                               | 0.079                       | 0.096                         | 0.105                          | 0.829                          | 0.821                       | 0.009                          | 0.265                       |
| Lymphoma                                      | 0.015**<br>(0.001 - 0.029)  | -0.024**<br>(-0.048 - -0.001) | 0.045***<br>(0.025 - 0.066)    | -0.001<br>(-0.037 - 0.034)     | 0.014<br>(-0.019 - 0.046)   | -0.031**<br>(-0.055 - -0.006)  | 0.010<br>(-0.032 - 0.052)   |
|                                               | 0.033                       | 0.041                         | 0.000                          | 0.936                          | 0.414                       | 0.016                          | 0.649                       |
| Metastatic cancer                             | 0.074***<br>(0.055 - 0.093) | -0.018<br>(-0.041 - 0.006)    | 0.024<br>(-0.011 - 0.060)      | -0.074***<br>(-0.109 - -0.038) | 0.099***<br>(0.064 - 0.133) | -0.012<br>(-0.038 - 0.014)     | 0.095***<br>(0.054 - 0.136) |
|                                               | 0.000                       | 0.139                         | 0.182                          | 0.000                          | 0.000                       | 0.358                          | 0.000                       |
| Solid tumor without metastasis, in situ       | -0.002<br>(-0.008 - 0.003)  | -0.014**<br>(-0.026 - -0.001) | 0.022***<br>(0.010 - 0.035)    | -0.004<br>(-0.020 - 0.013)     | -0.014*<br>(-0.029 - 0.001) | -0.012*<br>(-0.025 - 0.002)    | -0.015<br>(-0.034 - 0.005)  |
|                                               | 0.388                       | 0.028                         | 0.000                          | 0.677                          | 0.061                       | 0.086                          | 0.134                       |
| Solid tumor without metastasis, malignant     | 0.009***<br>(0.005 - 0.014) | -0.006<br>(-0.015 - 0.003)    | 0.027***<br>(0.018 - 0.036)    | -0.012*<br>(-0.024 - 0.001)    | 0.023***<br>(0.011 - 0.035) | -0.007<br>(-0.017 - 0.002)     | 0.038***<br>(0.023 - 0.053) |
|                                               | 0.000                       | 0.213                         | 0.000                          | 0.063                          | 0.000                       | 0.135                          | 0.000                       |
| Cerebrovascular disease - Primary             | 0.003*<br>(-0.000 - 0.006)  | 0.002<br>(-0.003 - 0.007)     | 0.020***<br>(0.014 - 0.026)    | -0.001<br>(-0.009 - 0.007)     | 0.033***<br>(0.026 - 0.040) | 0.006*<br>(-0.000 - 0.011)     | 0.046***<br>(0.037 - 0.055) |
|                                               | 0.054                       | 0.518                         | 0.000                          | 0.810                          | 0.000                       | 0.051                          | 0.000                       |
| Cerebrovascular disease - Sequela             | -0.001<br>(-0.008 - 0.006)  | 0.002<br>(-0.013 - 0.017)     | -0.021<br>(-0.048 - 0.007)     | -0.009<br>(-0.031 - 0.014)     | -0.004<br>(-0.022 - 0.015)  | -0.002<br>(-0.017 - 0.014)     | 0.014<br>(-0.012 - 0.039)   |
|                                               | 0.755                       | 0.797                         | 0.140                          | 0.445                          | 0.700                       | 0.829                          | 0.288                       |
| Coagulopathy                                  | 0.015***<br>(0.009 - 0.022) | -0.001<br>(-0.011 - 0.009)    | 0.020**<br>(0.004 - 0.037)     | 0.010<br>(-0.007 - 0.028)      | 0.051***<br>(0.035 - 0.066) | 0.011**<br>(0.000 - 0.023)     | 0.049***<br>(0.029 - 0.070) |
|                                               | 0.000                       | 0.815                         | 0.015                          | 0.252                          | 0.000                       | 0.042                          | 0.000                       |
| Dementia                                      | 0.012***<br>(0.006 - 0.017) | -0.001<br>(-0.012 - 0.010)    | -0.027***<br>(-0.046 - -0.009) | 0.000<br>(-0.016 - 0.016)      | 0.013*<br>(-0.001 - 0.027)  | 0.009<br>(-0.003 - 0.020)      | 0.005<br>(-0.014 - 0.023)   |
|                                               | 0.000                       | 0.795                         | 0.004                          | 0.981                          | 0.071                       | 0.148                          | 0.613                       |
| Depression                                    | -0.002<br>(-0.005 - 0.000)  | 0.016***<br>(0.012 - 0.020)   | 0.028***<br>(0.024 - 0.031)    | 0.070***<br>(0.064 - 0.076)    | 0.011***<br>(0.005 - 0.017) | 0.004*<br>(-0.001 - 0.008)     | 0.029***<br>(0.022 - 0.036) |
|                                               | 0.101                       | 0.000                         | 0.000                          | 0.000                          | 0.000                       | 0.098                          | 0.000                       |
| Diabetes with chronic complications           | 0.007***<br>(0.003 - 0.011) | -0.002<br>(-0.010 - 0.005)    | 0.004<br>(-0.005 - 0.013)      | -0.005<br>(-0.015 - 0.006)     | 0.023***<br>(0.013 - 0.032) | -0.002<br>(-0.010 - 0.005)     | 0.038***<br>(0.026 - 0.050) |
|                                               | 0.001                       | 0.519                         | 0.362                          | 0.382                          | 0.000                       | 0.527                          | 0.000                       |
| Diabetes without chronic complications        | -0.001                      | 0.001                         | 0.028***                       | -0.000                         | 0.006                       | 0.005                          | 0.009                       |

|                                               |                   |                   |                  |                   |                  |                   |                  |
|-----------------------------------------------|-------------------|-------------------|------------------|-------------------|------------------|-------------------|------------------|
|                                               | (-0.004 - 0.003)  | (-0.006 - 0.007)  | (0.022 - 0.034)  | (-0.009 - 0.009)  | (-0.003 - 0.014) | (-0.003 - 0.012)  | (-0.002 - 0.019) |
|                                               | 0.657             | 0.830             | 0.000            | 0.990             | 0.183            | 0.213             | 0.105            |
| Drug use disorder                             | 0.001             | 0.009***          | 0.008***         | 0.036***          | 0.048***         | 0.032***          | 0.051***         |
|                                               | (-0.003 - 0.004)  | (0.004 - 0.013)   | (0.002 - 0.014)  | (0.027 - 0.044)   | (0.041 - 0.055)  | (0.027 - 0.038)   | (0.042 - 0.059)  |
|                                               | 0.755             | 0.000             | 0.007            | 0.000             | 0.000            | 0.000             | 0.000            |
| Fluid and electrolyte disorders               | 0.009***          | 0.008***          | -0.003           | 0.004             | 0.079***         | 0.018***          | 0.103***         |
|                                               | (0.005 - 0.013)   | (0.003 - 0.014)   | (-0.013 - 0.008) | (-0.007 - 0.014)  | (0.069 - 0.088)  | (0.012 - 0.025)   | (0.092 - 0.115)  |
|                                               | 0.000             | 0.005             | 0.630            | 0.492             | 0.000            | 0.000             | 0.000            |
| Heart failure                                 | 0.021***          | -0.006            | 0.003            | -0.024***         | 0.038***         | -0.013***         | 0.017**          |
|                                               | (0.016 - 0.026)   | (-0.015 - 0.002)  | (-0.011 - 0.016) | (-0.037 - -0.011) | (0.027 - 0.050)  | (-0.021 - -0.004) | (0.003 - 0.032)  |
|                                               | 0.000             | 0.150             | 0.699            | 0.000             | 0.000            | 0.005             | 0.021            |
| Homeless                                      | 0.003             | 0.008***          | -0.003           | 0.039***          | 0.046***         | 0.031***          | 0.063***         |
|                                               | (-0.001 - 0.007)  | (0.003 - 0.012)   | (-0.008 - 0.003) | (0.031 - 0.048)   | (0.039 - 0.053)  | (0.026 - 0.036)   | (0.054 - 0.072)  |
|                                               | 0.127             | 0.001             | 0.381            | 0.000             | 0.000            | 0.000             | 0.000            |
| Hypertension, complicated                     | 0.001             | 0.006             | 0.002            | -0.011*           | 0.028***         | 0.002             | 0.029***         |
|                                               | (-0.003 - 0.005)  | (-0.002 - 0.015)  | (-0.009 - 0.013) | (-0.022 - 0.001)  | (0.018 - 0.039)  | (-0.007 - 0.010)  | (0.016 - 0.042)  |
|                                               | 0.622             | 0.147             | 0.712            | 0.073             | 0.000            | 0.671             | 0.000            |
| Hypertension, uncomplicated                   | -0.003*           | 0.004*            | 0.038***         | 0.006*            | 0.017***         | 0.001             | 0.030***         |
|                                               | (-0.005 - 0.000)  | (-0.000 - 0.008)  | (0.035 - 0.042)  | (-0.000 - 0.013)  | (0.011 - 0.023)  | (-0.004 - 0.005)  | (0.023 - 0.038)  |
|                                               | 0.087             | 0.054             | 0.000            | 0.054             | 0.000            | 0.794             | 0.000            |
| Liver disease, mild                           | 0.008***          | -0.001            | 0.027***         | 0.013**           | 0.040***         | 0.014***          | 0.048***         |
|                                               | (0.003 - 0.012)   | (-0.007 - 0.005)  | (0.020 - 0.035)  | (0.003 - 0.023)   | (0.031 - 0.048)  | (0.007 - 0.020)   | (0.037 - 0.059)  |
|                                               | 0.000             | 0.702             | 0.000            | 0.013             | 0.000            | 0.000             | 0.000            |
| Liver disease and failure, moderate to severe | 0.018***          | -0.009            | -0.003           | -0.025            | 0.019            | -0.017**          | 0.002            |
|                                               | (0.007 - 0.030)   | (-0.025 - 0.008)  | (-0.051 - 0.045) | (-0.057 - 0.008)  | (-0.006 - 0.044) | (-0.033 - -0.001) | (-0.033 - 0.037) |
|                                               | 0.002             | 0.298             | 0.911            | 0.134             | 0.134            | 0.039             | 0.900            |
| Liver disease                                 | 0.004             | -0.027*           |                  | -0.024            | 0.087**          | 0.008             | 0.112*           |
|                                               | (-0.019 - 0.026)  | (-0.058 - 0.004)  |                  | (-0.113 - 0.064)  | (0.005 - 0.169)  | (-0.034 - 0.051)  | (-0.001 - 0.226) |
|                                               | 0.746             | 0.091             |                  | 0.588             | 0.037            | 0.710             | 0.053            |
| Chronic pulmonary disease                     | 0.005***          | 0.005**           | 0.028***         | 0.010***          | 0.012***         | 0.005*            | 0.031***         |
|                                               | (0.002 - 0.008)   | (0.000 - 0.010)   | (0.023 - 0.033)  | (0.003 - 0.018)   | (0.005 - 0.018)  | (-0.000 - 0.010)  | (0.023 - 0.040)  |
|                                               | 0.001             | 0.049             | 0.000            | 0.007             | 0.000            | 0.076             | 0.000            |
| Neurological disorders affecting movement     | 0.001             | 0.018***          | 0.012*           | 0.031***          | 0.016**          | 0.021***          | 0.028***         |
|                                               | (-0.005 - 0.006)  | (0.008 - 0.028)   | (-0.002 - 0.026) | (0.016 - 0.046)   | (0.003 - 0.029)  | (0.010 - 0.031)   | (0.011 - 0.045)  |
|                                               | 0.761             | 0.000             | 0.081            | 0.000             | 0.014            | 0.000             | 0.001            |
| Other neurological disorders                  | 0.000             | -0.007**          | 0.018***         | 0.022***          | 0.011**          | -0.005            | 0.025***         |
|                                               | (-0.004 - 0.004)  | (-0.014 - -0.000) | (0.008 - 0.028)  | (0.010 - 0.034)   | (0.001 - 0.021)  | (-0.012 - 0.002)  | (0.012 - 0.038)  |
|                                               | 0.977             | 0.047             | 0.001            | 0.000             | 0.031            | 0.185             | 0.000            |
| Seizures and epilepsy                         | 0.009***          | 0.012***          | 0.014**          | -0.006            | 0.020***         | 0.002             | 0.023***         |
|                                               | (0.003 - 0.016)   | (0.004 - 0.021)   | (0.002 - 0.027)  | (-0.022 - 0.010)  | (0.008 - 0.032)  | (-0.006 - 0.011)  | (0.007 - 0.039)  |
|                                               | 0.004             | 0.004             | 0.019            | 0.473             | 0.002            | 0.594             | 0.006            |
| Obesity                                       | -0.005***         | -0.003            | 0.027***         | 0.020***          | 0.006*           | 0.002             | 0.032***         |
|                                               | (-0.008 - -0.002) | (-0.007 - 0.002)  | (0.022 - 0.032)  | (0.013 - 0.027)   | (-0.000 - 0.012) | (-0.003 - 0.007)  | (0.025 - 0.040)  |
|                                               | 0.001             | 0.233             | 0.000            | 0.000             | 0.062            | 0.386             | 0.000            |
| Paralysis                                     | 0.006             | 0.006             | 0.000            | -0.040***         | 0.024**          | -0.008            | 0.006            |
|                                               | (-0.003 - 0.015)  | (-0.011 - 0.022)  | (-0.025 - 0.025) | (-0.066 - -0.015) | (0.003 - 0.046)  | (-0.024 - 0.008)  | (-0.022 - 0.034) |
|                                               | 0.215             | 0.508             | 0.998            | 0.002             | 0.027            | 0.341             | 0.654            |

|                                              |                                |                               |                               |                               |                             |                                |                             |
|----------------------------------------------|--------------------------------|-------------------------------|-------------------------------|-------------------------------|-----------------------------|--------------------------------|-----------------------------|
| Peripheral vascular disease                  | 0.005***<br>(0.001 - 0.009)    | -0.006<br>(-0.013 - 0.002)    | 0.028***<br>(0.020 - 0.036)   | -0.005<br>(-0.015 - 0.006)    | 0.023***<br>(0.013 - 0.032) | -0.008**<br>(-0.016 - -0.001)  | 0.039***<br>(0.027 - 0.051) |
|                                              | 0.007                          | 0.125                         | 0.000                         | 0.360                         | 0.000                       | 0.035                          | 0.000                       |
| Psychoses                                    | -0.000<br>(-0.004 - 0.003)     | 0.014***<br>(0.010 - 0.018)   | 0.019***<br>(0.014 - 0.023)   | 0.075***<br>(0.068 - 0.082)   | 0.045***<br>(0.039 - 0.051) | 0.051***<br>(0.047 - 0.056)    | 0.050***<br>(0.042 - 0.057) |
|                                              | 0.794                          | 0.000                         | 0.000                         | 0.000                         | 0.000                       | 0.000                          | 0.000                       |
| Pulmonary circulation disease                | 0.007*<br>(-0.000 - 0.013)     | 0.004<br>(-0.010 - 0.018)     | 0.021*<br>(-0.001 - 0.043)    | 0.016<br>(-0.005 - 0.036)     | 0.047***<br>(0.029 - 0.066) | 0.008<br>(-0.006 - 0.023)      | 0.060***<br>(0.035 - 0.085) |
|                                              | 0.061                          | 0.573                         | 0.056                         | 0.132                         | 0.000                       | 0.267                          | 0.000                       |
| Renal (kidney) failure and disease, moderate | 0.004*<br>(-0.000 - 0.009)     | -0.002<br>(-0.011 - 0.007)    | 0.011**<br>(0.000 - 0.023)    | -0.006<br>(-0.019 - 0.006)    | -0.001<br>(-0.011 - 0.010)  | -0.005<br>(-0.015 - 0.004)     | 0.001<br>(-0.014 - 0.015)   |
|                                              | 0.056                          | 0.691                         | 0.047                         | 0.316                         | 0.919                       | 0.270                          | 0.942                       |
| Renal (kidney) failure and disease, severe   | 0.039***<br>(0.028 - 0.050)    | -0.021**<br>(-0.037 - -0.004) | -0.036**<br>(-0.067 - -0.005) | -0.029**<br>(-0.052 - -0.005) | 0.027**<br>(0.006 - 0.049)  | -0.037***<br>(-0.053 - -0.021) | -0.005<br>(-0.032 - 0.023)  |
|                                              | 0.000                          | 0.012                         | 0.023                         | 0.017                         | 0.012                       | 0.000                          | 0.741                       |
| Renal failure                                | -0.009***<br>(-0.015 - -0.004) | -0.009<br>(-0.023 - 0.006)    | 0.033***<br>(0.014 - 0.053)   | -0.001<br>(-0.022 - 0.021)    | -0.008<br>(-0.026 - 0.009)  | -0.002<br>(-0.018 - 0.013)     | 0.011<br>(-0.014 - 0.036)   |
|                                              | 0.001                          | 0.242                         | 0.001                         | 0.938                         | 0.362                       | 0.779                          | 0.384                       |
| Hypothyroidism                               | 0.001<br>(-0.003 - 0.005)      | 0.008**<br>(0.001 - 0.015)    | 0.031***<br>(0.024 - 0.038)   | 0.011**<br>(0.000 - 0.022)    | 0.010**<br>(0.001 - 0.020)  | 0.011***<br>(0.003 - 0.019)    | 0.009<br>(-0.003 - 0.020)   |
|                                              | 0.769                          | 0.028                         | 0.000                         | 0.042                         | 0.031                       | 0.006                          | 0.154                       |
| Other thyroid disorders                      | -0.006*<br>(-0.013 - 0.001)    | -0.006<br>(-0.018 - 0.006)    | 0.032***<br>(0.016 - 0.047)   | 0.008<br>(-0.012 - 0.027)     | -0.010<br>(-0.026 - 0.006)  | -0.019***<br>(-0.031 - -0.007) | 0.036***<br>(0.014 - 0.057) |
|                                              | 0.085                          | 0.332                         | 0.000                         | 0.446                         | 0.203                       | 0.002                          | 0.001                       |
| Peptic ulcer with bleeding                   | 0.004<br>(-0.005 - 0.014)      | 0.013<br>(-0.004 - 0.029)     | 0.002<br>(-0.027 - 0.031)     | 0.002<br>(-0.026 - 0.030)     | 0.041***<br>(0.018 - 0.065) | 0.015*<br>(-0.002 - 0.033)     | 0.039**<br>(0.007 - 0.070)  |
|                                              | 0.352                          | 0.145                         | 0.896                         | 0.910                         | 0.001                       | 0.091                          | 0.015                       |
| Valvular disease                             | 0.001<br>(-0.004 - 0.006)      | 0.001<br>(-0.011 - 0.013)     | 0.020**<br>(0.005 - 0.036)    | -0.012<br>(-0.028 - 0.005)    | 0.027***<br>(0.012 - 0.042) | 0.002<br>(-0.011 - 0.014)      | 0.036***<br>(0.017 - 0.056) |
|                                              | 0.644                          | 0.835                         | 0.011                         | 0.171                         | 0.000                       | 0.799                          | 0.000                       |
| Weight loss                                  | 0.011***<br>(0.006 - 0.016)    | 0.014***<br>(0.006 - 0.023)   | 0.020***<br>(0.008 - 0.031)   | -0.001<br>(-0.015 - 0.012)    | 0.023***<br>(0.012 - 0.034) | 0.002<br>(-0.007 - 0.010)      | 0.023***<br>(0.008 - 0.038) |
|                                              | 0.000                          | 0.001                         | 0.001                         | 0.872                         | 0.000                       | 0.701                          | 0.003                       |
| Observations                                 | 92,625                         | 92,664                        | 92,434                        | 92,664                        | 92,664                      | 92,664                         | 92,664                      |

Notes: DyDx incremental effects with 95% CI in parentheses, followed by p-value; \*\*\* p<0.01, \*\* p<0.05, \* p<0.1. Incremental effects calculated after logistic regression of outcomes on the covariates listed above and station fixed effects. We dropped age at separation missing (N=1,646) and recoded branch missing to other due to small cell size. Model observation numbers vary because some variable categories were dropped because there were no outcomes by group. Since logistic regression is fit by maximum likelihood, the maximum likelihood estimate is infinite, and it does not converge. Stata's solution is to omit that variable. All-cause mortality: one station (checklist 59) omitted (39 obs.). Any outpatient use: liver\_unk omitted (106 obs.), checklist 59 omitted (39 obs.), checklist 139 omitted (85 obs.).



**eTable 6.** Average Incremental Effects from Logistic Regressions of Association between Outcomes and Caring Letters Signatory in Sensitivity Analysis (Excluding deaths 15-30 days after scheduled mail date and opt outs)

| VARIABLES                                 | All-Cause Mortality            | Suicide Attempt                | Outpatient Care                | Outpatient Mental Health Care  | Inpatient Care                 | Inpatient Mental Health Care   | Emergency Department Use       |
|-------------------------------------------|--------------------------------|--------------------------------|--------------------------------|--------------------------------|--------------------------------|--------------------------------|--------------------------------|
| Randomization type (ref. Peer)            | -0.000<br>(-0.003 - 0.002)     | 0.001<br>(-0.002 - 0.005)      | 0.001<br>(-0.002 - 0.003)      | -0.004<br>(-0.009 - 0.001)     | 0.001<br>(-0.003 - 0.006)      | 0.001<br>(-0.003 - 0.005)      | -0.002<br>(-0.008 - 0.004)     |
|                                           | 0.684                          | 0.372                          | 0.692                          | 0.112                          | 0.604                          | 0.622                          | 0.464                          |
| Age in years                              | 0.002***<br>(0.001 - 0.002)    | -0.002***<br>(-0.002 - -0.001) | -0.000***<br>(-0.001 - -0.000) | -0.005***<br>(-0.006 - -0.005) | -0.000***<br>(-0.001 - -0.000) | -0.001***<br>(-0.001 - -0.001) | -0.002***<br>(-0.002 - -0.002) |
|                                           | 0.000                          | 0.000                          | 0.000                          | 0.000                          | 0.000                          | 0.000                          | 0.000                          |
| Female sex                                | -0.014***<br>(-0.018 - -0.011) | -0.004*<br>(-0.008 - 0.001)    | 0.008***<br>(0.004 - 0.012)    | 0.034***<br>(0.026 - 0.042)    | -0.031***<br>(-0.037 - -0.024) | -0.018***<br>(-0.023 - -0.013) | -0.007*<br>(-0.015 - 0.001)    |
|                                           | 0.000                          | 0.084                          | 0.000                          | 0.000                          | 0.000                          | 0.000                          | 0.093                          |
| Race (ref. White)                         |                                |                                |                                |                                |                                |                                |                                |
| Black                                     | -0.011***<br>(-0.014 - -0.008) | -0.011***<br>(-0.015 - -0.007) | 0.007***<br>(0.003 - 0.010)    | 0.013***<br>(0.006 - 0.020)    | -0.002<br>(-0.008 - 0.004)     | 0.002<br>(-0.002 - 0.007)      | 0.054***<br>(0.046 - 0.061)    |
|                                           | 0.000                          | 0.000                          | 0.000                          | 0.000                          | 0.472                          | 0.303                          | 0.000                          |
| Asian                                     | -0.015**<br>(-0.026 - -0.003)  | 0.000<br>(-0.015 - 0.015)      | 0.015***<br>(0.004 - 0.025)    | -0.024*<br>(-0.049 - 0.000)    | -0.020*<br>(-0.043 - 0.004)    | -0.005<br>(-0.023 - 0.013)     | -0.005<br>(-0.032 - 0.022)     |
|                                           | 0.011                          | 0.975                          | 0.006                          | 0.052                          | 0.097                          | 0.590                          | 0.716                          |
| More Than One Race                        | -0.017***<br>(-0.026 - -0.008) | -0.009<br>(-0.021 - 0.003)     | 0.002<br>(-0.009 - 0.013)      | -0.000<br>(-0.022 - 0.021)     | -0.008<br>(-0.028 - 0.011)     | -0.007<br>(-0.021 - 0.007)     | 0.012<br>(-0.011 - 0.036)      |
|                                           | 0.000                          | 0.131                          | 0.732                          | 0.975                          | 0.395                          | 0.326                          | 0.304                          |
| American Indian or Alaska Native          | 0.006<br>(-0.008 - 0.019)      | 0.007<br>(-0.008 - 0.022)      | -0.002<br>(-0.015 - 0.012)     | -0.009<br>(-0.035 - 0.016)     | 0.016<br>(-0.007 - 0.040)      | -0.009<br>(-0.025 - 0.007)     | 0.008<br>(-0.019 - 0.036)      |
|                                           | 0.423                          | 0.338                          | 0.809                          | 0.470                          | 0.170                          | 0.291                          | 0.557                          |
| Native Hawaiian or Other Pacific Islander | -0.012**<br>(-0.022 - -0.001)  | 0.001<br>(-0.015 - 0.017)      | 0.018***<br>(0.006 - 0.030)    | 0.028**<br>(0.003 - 0.053)     | -0.014<br>(-0.038 - 0.010)     | -0.004<br>(-0.023 - 0.014)     | 0.019<br>(-0.010 - 0.049)      |
|                                           | 0.031                          | 0.917                          | 0.003                          | 0.026                          | 0.257                          | 0.650                          | 0.197                          |
| Race Unknown                              | -0.001<br>(-0.006 - 0.005)     | -0.006*<br>(-0.012 - 0.000)    | -0.014***<br>(-0.019 - -0.009) | -0.016***<br>(-0.026 - -0.005) | -0.007<br>(-0.017 - 0.003)     | -0.003<br>(-0.011 - 0.005)     | 0.002<br>(-0.010 - 0.014)      |
|                                           | 0.779                          | 0.061                          | 0.000                          | 0.003                          | 0.160                          | 0.441                          | 0.724                          |
| Ethnicity (ref. Not Hispanic)             |                                |                                |                                |                                |                                |                                |                                |
| Hispanic                                  | -0.006**<br>(-0.011 - -0.001)  | 0.004<br>(-0.003 - 0.010)      | 0.009***<br>(0.004 - 0.014)    | 0.012**<br>(0.001 - 0.023)     | -0.008<br>(-0.018 - 0.002)     | -0.008**<br>(-0.015 - -0.000)  | 0.022***<br>(0.010 - 0.034)    |
|                                           | 0.015                          | 0.244                          | 0.001                          | 0.026                          | 0.103                          | 0.037                          | 0.000                          |
| Ethnicity Unknown                         | 0.004<br>(-0.003 - 0.010)      | 0.007*<br>(-0.001 - 0.014)     | -0.012***<br>(-0.017 - -0.007) | 0.004<br>(-0.006 - 0.015)      | 0.003<br>(-0.008 - 0.015)      | 0.005<br>(-0.004 - 0.014)      | -0.010<br>(-0.023 - 0.004)     |
|                                           | 0.261                          | 0.084                          | 0.000                          | 0.428                          | 0.584                          | 0.249                          | 0.160                          |

|                                              |                                      |                                     |                                         |                                        |                                         |                                         |                                         |  |
|----------------------------------------------|--------------------------------------|-------------------------------------|-----------------------------------------|----------------------------------------|-----------------------------------------|-----------------------------------------|-----------------------------------------|--|
| Marital Status (ref. Married)                |                                      |                                     |                                         |                                        |                                         |                                         |                                         |  |
| Single/Never Married                         | 0.008***<br>(0.004 - 0.011)          | -0.003<br>(-0.007 - 0.002)          | -0.006***<br>(-0.009 - -0.002)          | -0.013***<br>(-0.020 - -0.006)         | 0.030***<br>(0.023 - 0.036)             | 0.011***<br>(0.006 - 0.016)             | 0.046***<br>(0.038 - 0.054)             |  |
| Divorced/Separated/<br>Widowed               | 0.000<br>0.007***<br>(0.005 - 0.010) | 0.207<br>0.002<br>(-0.002 - 0.006)  | 0.004<br>0.000<br>(-0.003 - 0.004)      | 0.001<br>-0.001<br>(-0.007 - 0.005)    | 0.000<br>0.033***<br>(0.027 - 0.038)    | 0.000<br>0.011***<br>(0.007 - 0.016)    | 0.000<br>0.049***<br>(0.042 - 0.055)    |  |
| Marital Status Unknown                       | 0.000<br>-0.000<br>(-0.011 - 0.011)  | 0.285<br>-0.004<br>(-0.017 - 0.008) | 0.932<br>-0.033***<br>(-0.042 - -0.024) | 0.826<br>-0.070***<br>(-0.089 - 0.051) | 0.000<br>-0.063***<br>(-0.082 - -0.044) | 0.000<br>-0.036***<br>(-0.050 - -0.022) | 0.000<br>-0.108***<br>(-0.131 - -0.085) |  |
|                                              | 0.996                                | 0.476                               | 0.000                                   | 0.000                                  | 0.000                                   | 0.000                                   | 0.000                                   |  |
| Age at Separation Quartile (ref. quartile 1) |                                      |                                     |                                         |                                        |                                         |                                         |                                         |  |
| Quartile 2                                   | 0.001<br>(-0.002 - 0.004)            | -0.003<br>(-0.008 - 0.002)          | 0.001<br>(-0.003 - 0.005)               | -0.001<br>(-0.008 - 0.006)             | 0.001<br>(-0.005 - 0.008)               | -0.002<br>(-0.008 - 0.003)              | -0.007*<br>(-0.016 - 0.001)             |  |
| Quartile 3                                   | 0.444<br>-0.001<br>(-0.004 - 0.003)  | 0.231<br>-0.003<br>(-0.008 - 0.001) | 0.757<br>0.001<br>(-0.003 - 0.006)      | 0.765<br>0.008**<br>(0.001 - 0.016)    | 0.701<br>0.003<br>(-0.004 - 0.010)      | 0.346<br>-0.000<br>(-0.006 - 0.005)     | 0.072<br>-0.002<br>(-0.010 - 0.006)     |  |
| Quartile 4                                   | 0.685<br>-0.001<br>(-0.004 - 0.003)  | 0.149<br>-0.003<br>(-0.008 - 0.002) | 0.473<br>0.009***<br>(0.005 - 0.013)    | 0.027<br>0.029***<br>(0.021 - 0.036)   | 0.398<br>-0.002<br>(-0.009 - 0.005)     | 0.885<br>-0.000<br>(-0.006 - 0.005)     | 0.648<br>-0.013***<br>(-0.021 - -0.004) |  |
|                                              | 0.673                                | 0.226                               | 0.000                                   | 0.000                                  | 0.565                                   | 0.918                                   | 0.004                                   |  |
| Military Branch (ref. Army)                  |                                      |                                     |                                         |                                        |                                         |                                         |                                         |  |
| Air Force                                    | -0.001<br>(-0.004 - 0.003)           | 0.002<br>(-0.003 - 0.007)           | 0.001<br>(-0.003 - 0.006)               | 0.009**<br>(0.002 - 0.017)             | -0.006*<br>(-0.014 - 0.001)             | -0.000<br>(-0.006 - 0.006)              | -0.001<br>(-0.010 - 0.008)              |  |
| Navy                                         | 0.595<br>-0.002<br>(-0.005 - 0.001)  | 0.512<br>0.003<br>(-0.002 - 0.007)  | 0.540<br>-0.002<br>(-0.006 - 0.002)     | 0.019<br>0.011***<br>(0.004 - 0.017)   | 0.096<br>0.002<br>(-0.004 - 0.009)      | 0.998<br>0.001<br>(-0.004 - 0.006)      | 0.864<br>0.005<br>(-0.003 - 0.012)      |  |
| Marine Corps                                 | 0.120<br>-0.001<br>(-0.005 - 0.002)  | 0.207<br>0.002<br>(-0.003 - 0.007)  | 0.272<br>0.002<br>(-0.002 - 0.006)      | 0.002<br>0.003<br>(-0.005 - 0.011)     | 0.458<br>0.001<br>(-0.006 - 0.008)      | 0.765<br>-0.001<br>(-0.006 - 0.005)     | 0.212<br>-0.006<br>(-0.015 - 0.003)     |  |
| Other or missing                             | 0.487<br>-0.003<br>(-0.013 - 0.007)  | 0.430<br>0.001<br>(-0.015 - 0.016)  | 0.336<br>-0.003<br>(-0.015 - 0.010)     | 0.480<br>0.016<br>(-0.008 - 0.039)     | 0.819<br>0.002<br>(-0.020 - 0.025)      | 0.798<br>-0.002<br>(-0.019 - 0.016)     | 0.214<br>-0.002<br>(-0.030 - 0.025)     |  |
|                                              | 0.584                                | 0.935                               | 0.694                                   | 0.186                                  | 0.846                                   | 0.856                                   | 0.864                                   |  |
| Discharge Type (ref. Honorable)              |                                      |                                     |                                         |                                        |                                         |                                         |                                         |  |
| Dishonorable                                 | 0.009<br>(-0.008 - 0.027)            | 0.006<br>(-0.014 - 0.026)           | -0.014**<br>(-0.025 - -0.003)           | -0.021<br>(-0.049 - 0.008)             | 0.010<br>(-0.022 - 0.041)               | 0.010<br>(-0.014 - 0.033)               | 0.031<br>(-0.007 - 0.069)               |  |
| Other                                        | 0.296<br>0.008**<br>(0.002 - 0.014)  | 0.554<br>0.006**<br>(0.001 - 0.012) | 0.010<br>-0.008***<br>(-0.013 - -0.003) | 0.153<br>-0.005<br>(-0.015 - 0.006)    | 0.558<br>0.013***<br>(0.004 - 0.023)    | 0.415<br>0.010***<br>(0.003 - 0.016)    | 0.110<br>0.014**<br>(0.003 - 0.025)     |  |

|                                                     |                                         |                                        |                                         |                                        |                                      |                                        |                                      |
|-----------------------------------------------------|-----------------------------------------|----------------------------------------|-----------------------------------------|----------------------------------------|--------------------------------------|----------------------------------------|--------------------------------------|
| Unknown                                             | 0.010<br>0.008<br>(-0.005 - 0.022)      | 0.030<br>0.008<br>(-0.010 - 0.026)     | 0.003<br>0.001<br>(-0.012 - 0.014)      | 0.392<br>-0.003<br>(-0.029 - 0.023)    | 0.004<br>-0.004<br>(-0.029 - 0.021)  | 0.004<br>-0.001<br>(-0.021 - 0.018)    | 0.013<br>0.011<br>(-0.020 - 0.041)   |
| Any inpatient mental health stay in the past year   | 0.232<br>0.001<br>(-0.004 - 0.007)      | 0.387<br>0.024***<br>(0.018 - 0.031)   | 0.887<br>-0.023***<br>(-0.040 - -0.007) | 0.833<br>0.055***<br>(0.038 - 0.071)   | 0.775<br>0.115***<br>(0.104 - 0.127) | 0.900<br>0.110***<br>(0.101 - 0.119)   | 0.494<br>0.104***<br>(0.090 - 0.118) |
| Any outpatient mental health visit in the past year | 0.587<br>-0.006***<br>(-0.009 - -0.003) | 0.000<br>0.012***<br>(0.008 - 0.016)   | 0.005<br>0.048***<br>(0.045 - 0.052)    | 0.000<br>0.214***<br>(0.207 - 0.221)   | 0.000<br>0.019***<br>(0.013 - 0.025) | 0.000<br>0.024***<br>(0.019 - 0.029)   | 0.000<br>0.059***<br>(0.052 - 0.066) |
| Any SRE in the past year                            | 0.000<br>0.001<br>(-0.005 - 0.007)      | 0.000<br>0.197***<br>(0.186 - 0.207)   | 0.000<br>0.041***<br>(0.036 - 0.046)    | 0.000<br>0.147***<br>(0.135 - 0.160)   | 0.000<br>0.103***<br>(0.092 - 0.114) | 0.000<br>0.076***<br>(0.068 - 0.084)   | 0.000<br>0.061***<br>(0.048 - 0.074) |
| Elixhauser comorbidities                            |                                         |                                        |                                         |                                        |                                      |                                        |                                      |
| Acquired immune deficiency syndrome                 | -0.011**<br>(-0.020 - -0.001)           | 0.010<br>(-0.007 - 0.026)              | 0.030***<br>(0.013 - 0.046)             | 0.005<br>(-0.024 - 0.034)              | 0.023*<br>(-0.000 - 0.046)           | 0.010<br>(-0.007 - 0.027)              | 0.074***<br>(0.043 - 0.105)          |
| Alcohol disorder                                    | 0.030<br>0.009***<br>(0.005 - 0.013)    | 0.244<br>0.016***<br>(0.011 - 0.020)   | 0.001<br>0.008***<br>(0.003 - 0.013)    | 0.724<br>0.026***<br>(0.018 - 0.033)   | 0.051<br>0.067***<br>(0.061 - 0.074) | 0.230<br>0.028***<br>(0.024 - 0.033)   | 0.000<br>0.031***<br>(0.024 - 0.039) |
| Anemias due to other nutritional deficiencies       | 0.000<br>0.003*<br>(-0.000 - 0.007)     | 0.000<br>-0.000<br>(-0.006 - 0.006)    | 0.001<br>0.018***<br>(0.011 - 0.026)    | 0.000<br>-0.008*<br>(-0.018 - 0.001)   | 0.000<br>0.016***<br>(0.008 - 0.024) | 0.000<br>-0.004<br>(-0.010 - 0.002)    | 0.000<br>0.020***<br>(0.009 - 0.030) |
| Autoimmune conditions                               | 0.062<br>-0.003<br>(-0.009 - 0.004)     | 0.979<br>0.000<br>(-0.010 - 0.010)     | 0.000<br>0.027***<br>(0.015 - 0.040)    | 0.093<br>0.014*<br>(-0.003 - 0.031)    | 0.000<br>0.020***<br>(0.005 - 0.035) | 0.213<br>-0.003<br>(-0.014 - 0.008)    | 0.000<br>0.059***<br>(0.040 - 0.078) |
| Chronic blood loss (iron deficiency)                | 0.425<br>0.007<br>(-0.002 - 0.017)      | 0.999<br>-0.003<br>(-0.021 - 0.014)    | 0.000<br>-0.007<br>(-0.043 - 0.029)     | 0.099<br>-0.001<br>(-0.030 - 0.029)    | 0.009<br>0.020<br>(-0.005 - 0.045)   | 0.596<br>-0.010<br>(-0.028 - 0.009)    | 0.000<br>0.015<br>(-0.017 - 0.048)   |
| Leukemia                                            | 0.142<br>0.014<br>(-0.003 - 0.032)      | 0.732<br>-0.026<br>(-0.057 - 0.006)    | 0.716<br>0.026<br>(-0.007 - 0.060)      | 0.971<br>-0.004<br>(-0.048 - 0.041)    | 0.112<br>0.007<br>(-0.035 - 0.049)   | 0.300<br>-0.040**<br>(-0.070 - -0.009) | 0.357<br>0.035<br>(-0.020 - 0.089)   |
| Lymphoma                                            | 0.104<br>0.015**<br>(0.001 - 0.029)     | 0.113<br>-0.024**<br>(-0.048 - -0.001) | 0.117<br>0.045***<br>(0.024 - 0.066)    | 0.875<br>-0.001<br>(-0.037 - 0.034)    | 0.742<br>0.015<br>(-0.018 - 0.048)   | 0.012<br>-0.030**<br>(-0.055 - -0.005) | 0.212<br>0.012<br>(-0.030 - 0.055)   |
| Metastatic cancer                                   | 0.031<br>0.069***<br>(0.050 - 0.088)    | 0.043<br>-0.017<br>(-0.041 - 0.007)    | 0.000<br>0.023<br>(-0.014 - 0.060)      | 0.940<br>-0.070***<br>(-0.105 - 0.034) | 0.367<br>0.098***<br>(0.063 - 0.133) | 0.017<br>-0.012<br>(-0.038 - 0.014)    | 0.573<br>0.097***<br>(0.055 - 0.138) |
| Solid tumor without metastasis, in situ             | 0.000<br>-0.002                         | 0.154<br>-0.014**                      | 0.220<br>0.021***                       | 0.000<br>-0.003                        | 0.000<br>-0.015**                    | 0.381<br>-0.012*                       | 0.000<br>-0.015                      |

|                                           |                                      |                                      |                                         |                                        |                                      |                                         |                                      |
|-------------------------------------------|--------------------------------------|--------------------------------------|-----------------------------------------|----------------------------------------|--------------------------------------|-----------------------------------------|--------------------------------------|
|                                           | (-0.008 - 0.003)                     | (-0.026 - -0.001)                    | (0.009 - 0.034)                         | (-0.020 - 0.013)                       | (-0.030 - -0.001)                    | (-0.025 - 0.002)                        | (-0.035 - 0.004)                     |
| Solid tumor without metastasis, malignant | 0.373<br>0.009***<br>(0.004 - 0.014) | 0.031<br>-0.006<br>(-0.015 - 0.003)  | 0.001<br>0.028***<br>(0.019 - 0.037)    | 0.705<br>-0.012*<br>(-0.024 - 0.001)   | 0.042<br>0.023***<br>(0.011 - 0.035) | 0.087<br>-0.007<br>(-0.017 - 0.002)     | 0.117<br>0.038***<br>(0.023 - 0.053) |
| Cerebrovascular disease - Primary         | 0.000<br>0.003*<br>(-0.000 - 0.006)  | 0.207<br>0.002<br>(-0.003 - 0.007)   | 0.000<br>0.020***<br>(0.014 - 0.026)    | 0.063<br>-0.001<br>(-0.009 - 0.007)    | 0.000<br>0.033***<br>(0.026 - 0.040) | 0.131<br>0.005*<br>(-0.000 - 0.011)     | 0.000<br>0.047***<br>(0.037 - 0.056) |
| Cerebrovascular disease - Sequela         | 0.068<br>-0.001<br>(-0.008 - 0.006)  | 0.502<br>0.001<br>(-0.014 - 0.016)   | 0.000<br>-0.022<br>(-0.050 - 0.005)     | 0.803<br>-0.008<br>(-0.031 - 0.014)    | 0.000<br>-0.003<br>(-0.022 - 0.015)  | 0.056<br>-0.001<br>(-0.017 - 0.014)     | 0.000<br>0.013<br>(-0.013 - 0.038)   |
| Coagulopathy                              | 0.782<br>0.015***<br>(0.009 - 0.022) | 0.863<br>-0.001<br>(-0.011 - 0.009)  | 0.115<br>0.022***<br>(0.006 - 0.038)    | 0.481<br>0.012<br>(-0.006 - 0.029)     | 0.713<br>0.051***<br>(0.035 - 0.066) | 0.880<br>0.012**<br>(0.001 - 0.023)     | 0.328<br>0.049***<br>(0.029 - 0.069) |
| Dementia                                  | 0.000<br>0.010***<br>(0.004 - 0.015) | 0.859<br>-0.002<br>(-0.013 - 0.009)  | 0.008<br>-0.026***<br>(-0.044 - -0.007) | 0.197<br>0.000<br>(-0.016 - 0.016)     | 0.000<br>0.013*<br>(-0.001 - 0.027)  | 0.036<br>0.009<br>(-0.003 - 0.021)      | 0.000<br>0.006<br>(-0.013 - 0.024)   |
| Depression                                | 0.001<br>-0.002<br>(-0.005 - 0.001)  | 0.683<br>0.016***<br>(0.012 - 0.019) | 0.007<br>0.028***<br>(0.024 - 0.031)    | 0.961<br>0.070***<br>(0.064 - 0.077)   | 0.070<br>0.011***<br>(0.005 - 0.016) | 0.141<br>0.004<br>(-0.001 - 0.008)      | 0.557<br>0.029***<br>(0.022 - 0.036) |
| Diabetes with chronic complications       | 0.152<br>0.007***<br>(0.003 - 0.012) | 0.000<br>-0.002<br>(-0.010 - 0.005)  | 0.000<br>0.005<br>(-0.005 - 0.014)      | 0.000<br>-0.005<br>(-0.015 - 0.006)    | 0.000<br>0.022***<br>(0.013 - 0.032) | 0.104<br>-0.002<br>(-0.010 - 0.005)     | 0.000<br>0.038***<br>(0.026 - 0.050) |
| Diabetes without chronic complications    | 0.001<br>-0.001<br>(-0.004 - 0.003)  | 0.542<br>0.001<br>(-0.006 - 0.007)   | 0.331<br>0.028***<br>(0.022 - 0.034)    | 0.374<br>-0.000<br>(-0.009 - 0.009)    | 0.000<br>0.006<br>(-0.003 - 0.014)   | 0.527<br>0.005<br>(-0.002 - 0.012)      | 0.000<br>0.009<br>(-0.002 - 0.019)   |
| Drug use disorder                         | 0.707<br>0.000<br>(-0.003 - 0.004)   | 0.812<br>0.009***<br>(0.004 - 0.013) | 0.000<br>0.008***<br>(0.002 - 0.014)    | 0.969<br>0.036***<br>(0.028 - 0.045)   | 0.167<br>0.048***<br>(0.041 - 0.055) | 0.190<br>0.032***<br>(0.027 - 0.038)    | 0.105<br>0.051***<br>(0.042 - 0.059) |
| Fluid and electrolyte disorders           | 0.944<br>0.008***<br>(0.005 - 0.012) | 0.000<br>0.008***<br>(0.002 - 0.014) | 0.007<br>-0.003<br>(-0.013 - 0.008)     | 0.000<br>0.005<br>(-0.006 - 0.015)     | 0.000<br>0.079***<br>(0.070 - 0.088) | 0.000<br>0.018***<br>(0.012 - 0.025)    | 0.000<br>0.104***<br>(0.092 - 0.115) |
| Heart failure                             | 0.000<br>0.019***<br>(0.014 - 0.024) | 0.005<br>-0.006<br>(-0.015 - 0.002)  | 0.643<br>0.006<br>(-0.007 - 0.019)      | 0.394<br>-0.023***<br>(-0.036 - 0.010) | 0.000<br>0.038***<br>(0.027 - 0.050) | 0.000<br>-0.013***<br>(-0.021 - -0.004) | 0.000<br>0.019**<br>(0.004 - 0.033)  |
| Homeless                                  | 0.000<br>0.003<br>(-0.001 - 0.006)   | 0.156<br>0.008***<br>(0.003 - 0.012) | 0.357<br>-0.003<br>(-0.008 - 0.003)     | 0.000<br>0.039***<br>(0.030 - 0.048)   | 0.000<br>0.047***<br>(0.039 - 0.054) | 0.004<br>0.031***<br>(0.026 - 0.036)    | 0.011<br>0.063***<br>(0.054 - 0.072) |

|                                               |                   |                   |                  |                  |                  |                   |                  |
|-----------------------------------------------|-------------------|-------------------|------------------|------------------|------------------|-------------------|------------------|
| Hypertension, complicated                     | 0.153             | 0.001             | 0.391            | 0.000            | 0.000            | 0.000             | 0.000            |
|                                               | 0.002             | 0.006             | 0.002            | -0.011*          | 0.028***         | 0.002             | 0.029***         |
|                                               | (-0.002 - 0.006)  | (-0.002 - 0.015)  | (-0.009 - 0.013) | (-0.023 - 0.000) | (0.018 - 0.039)  | (-0.007 - 0.010)  | (0.016 - 0.043)  |
| Hypertension, uncomplicated                   | 0.350             | 0.135             | 0.737            | 0.055            | 0.000            | 0.698             | 0.000            |
|                                               | -0.002            | 0.004*            | 0.038***         | 0.006*           | 0.017***         | 0.000             | 0.030***         |
|                                               | (-0.005 - 0.001)  | (-0.000 - 0.008)  | (0.035 - 0.042)  | (-0.000 - 0.013) | (0.011 - 0.023)  | (-0.004 - 0.005)  | (0.023 - 0.038)  |
| Liver disease, mild                           | 0.118             | 0.059             | 0.000            | 0.057            | 0.000            | 0.844             | 0.000            |
|                                               | 0.007***          | -0.001            | 0.027***         | 0.013**          | 0.040***         | 0.014***          | 0.048***         |
|                                               | (0.003 - 0.012)   | (-0.007 - 0.005)  | (0.019 - 0.035)  | (0.002 - 0.023)  | (0.031 - 0.049)  | (0.007 - 0.020)   | (0.036 - 0.059)  |
| Liver disease and failure, moderate to severe | 0.001             | 0.719             | 0.000            | 0.016            | 0.000            | 0.000             | 0.000            |
|                                               | 0.016***          | -0.008            | -0.004           | -0.025           | 0.019            | -0.016**          | 0.003            |
|                                               | (0.005 - 0.027)   | (-0.024 - 0.008)  | (-0.053 - 0.045) | (-0.057 - 0.007) | (-0.006 - 0.044) | (-0.032 - -0.000) | (-0.032 - 0.038) |
| Liver disease                                 | 0.004             | 0.323             | 0.877            | 0.130            | 0.141            | 0.045             | 0.874            |
|                                               | 0.003             | -0.027*           |                  | -0.032           | 0.085**          | 0.008             | 0.109*           |
|                                               | (-0.019 - 0.025)  | (-0.058 - 0.004)  |                  | (-0.122 - 0.057) | (0.003 - 0.166)  | (-0.034 - 0.051)  | (-0.004 - 0.223) |
| Chronic pulmonary disease                     | 0.786             | 0.092             |                  | 0.479            | 0.041            | 0.710             | 0.059            |
|                                               | 0.005***          | 0.005**           | 0.028***         | 0.010***         | 0.012***         | 0.005*            | 0.031***         |
|                                               | (0.002 - 0.008)   | (0.000 - 0.010)   | (0.023 - 0.033)  | (0.003 - 0.018)  | (0.006 - 0.019)  | (-0.000 - 0.010)  | (0.023 - 0.039)  |
| Neurological disorders affecting movement     | 0.001             | 0.044             | 0.000            | 0.007            | 0.000            | 0.069             | 0.000            |
|                                               | 0.001             | 0.019***          | 0.011            | 0.031***         | 0.017**          | 0.021***          | 0.028***         |
|                                               | (-0.004 - 0.007)  | (0.009 - 0.029)   | (-0.002 - 0.025) | (0.016 - 0.046)  | (0.004 - 0.030)  | (0.011 - 0.032)   | (0.011 - 0.045)  |
| Other neurological disorders                  | 0.710             | 0.000             | 0.100            | 0.000            | 0.011            | 0.000             | 0.001            |
|                                               | 0.000             | -0.007**          | 0.017***         | 0.022***         | 0.011**          | -0.005            | 0.025***         |
|                                               | (-0.004 - 0.005)  | (-0.014 - -0.000) | (0.007 - 0.028)  | (0.010 - 0.034)  | (0.001 - 0.021)  | (-0.012 - 0.002)  | (0.012 - 0.039)  |
| Seizures and epilepsy                         | 0.818             | 0.046             | 0.001            | 0.000            | 0.025            | 0.183             | 0.000            |
|                                               | 0.010***          | 0.013***          | 0.014**          | -0.007           | 0.019***         | 0.002             | 0.023***         |
|                                               | (0.003 - 0.016)   | (0.004 - 0.021)   | (0.002 - 0.026)  | (-0.023 - 0.009) | (0.007 - 0.031)  | (-0.006 - 0.011)  | (0.007 - 0.039)  |
| Obesity                                       | 0.003             | 0.003             | 0.024            | 0.407            | 0.002            | 0.610             | 0.006            |
|                                               | -0.005***         | -0.003            | 0.027***         | 0.020***         | 0.006*           | 0.002             | 0.033***         |
|                                               | (-0.008 - -0.002) | (-0.007 - 0.002)  | (0.022 - 0.032)  | (0.013 - 0.027)  | (-0.000 - 0.012) | (-0.003 - 0.007)  | (0.025 - 0.040)  |
| Paralysis                                     | 0.001             | 0.235             | 0.000            | 0.000            | 0.060            | 0.370             | 0.000            |
|                                               | 0.005             | 0.006             | -0.000           | -0.041***        | 0.023**          | -0.008            | 0.005            |
|                                               | (-0.004 - 0.014)  | (-0.010 - 0.023)  | (-0.025 - 0.024) | (-0.066 - 0.015) | (0.002 - 0.045)  | (-0.024 - 0.008)  | (-0.023 - 0.033) |
| Peripheral vascular disease                   | 0.265             | 0.452             | 0.981            | 0.002            | 0.035            | 0.304             | 0.716            |
|                                               | 0.005**           | -0.006            | 0.028***         | -0.004           | 0.023***         | -0.008**          | 0.039***         |
|                                               | (0.001 - 0.008)   | (-0.013 - 0.002)  | (0.020 - 0.036)  | (-0.014 - 0.007) | (0.013 - 0.032)  | (-0.015 - -0.000) | (0.027 - 0.051)  |
| Psychoses                                     | 0.011             | 0.129             | 0.000            | 0.472            | 0.000            | 0.041             | 0.000            |
|                                               | -0.000            | 0.014***          | 0.019***         | 0.075***         | 0.045***         | 0.052***          | 0.050***         |
|                                               | (-0.003 - 0.003)  | (0.010 - 0.018)   | (0.014 - 0.023)  | (0.068 - 0.082)  | (0.039 - 0.051)  | (0.047 - 0.056)   | (0.043 - 0.057)  |
|                                               | 0.826             | 0.000             | 0.000            | 0.000            | 0.000            | 0.000             | 0.000            |

|                                              |                                         |                                        |                                      |                                       |                                      |                                         |                                      |
|----------------------------------------------|-----------------------------------------|----------------------------------------|--------------------------------------|---------------------------------------|--------------------------------------|-----------------------------------------|--------------------------------------|
| Pulmonary circulation disease                | 0.006*<br>(-0.000 - 0.013)              | 0.004<br>(-0.010 - 0.018)              | 0.020*<br>(-0.002 - 0.042)           | 0.016<br>(-0.005 - 0.036)             | 0.048***<br>(0.029 - 0.067)          | 0.007<br>(-0.007 - 0.022)               | 0.062***<br>(0.036 - 0.087)          |
| Renal (kidney) failure and disease, moderate | 0.069<br>0.004*<br>(-0.001 - 0.008)     | 0.553<br>-0.002<br>(-0.011 - 0.007)    | 0.074<br>0.012**<br>(0.001 - 0.024)  | 0.135<br>-0.006<br>(-0.018 - 0.006)   | 0.000<br>-0.000<br>(-0.011 - 0.011)  | 0.330<br>-0.005<br>(-0.015 - 0.004)     | 0.000<br>0.001<br>(-0.014 - 0.015)   |
| Renal (kidney) failure and disease, severe   | 0.096<br>0.036***<br>(0.025 - 0.046)    | 0.658<br>-0.020**<br>(-0.037 - -0.004) | 0.038<br>-0.029*<br>(-0.060 - 0.002) | 0.351<br>-0.029**<br>(-0.053 - 0.006) | 0.968<br>0.026**<br>(0.004 - 0.047)  | 0.278<br>-0.038***<br>(-0.054 - -0.023) | 0.944<br>-0.006<br>(-0.034 - 0.022)  |
| Renal failure                                | 0.000<br>-0.009***<br>(-0.014 - -0.003) | 0.016<br>-0.008<br>(-0.023 - 0.006)    | 0.070<br>0.033***<br>(0.013 - 0.053) | 0.015<br>-0.002<br>(-0.023 - 0.020)   | 0.019<br>-0.007<br>(-0.025 - 0.010)  | 0.000<br>-0.002<br>(-0.017 - 0.014)     | 0.673<br>0.011<br>(-0.014 - 0.036)   |
| Hypothyroidism                               | 0.003<br>0.000<br>(-0.004 - 0.004)      | 0.250<br>0.008**<br>(0.001 - 0.015)    | 0.001<br>0.031***<br>(0.023 - 0.038) | 0.864<br>0.011**<br>(0.000 - 0.022)   | 0.412<br>0.011**<br>(0.001 - 0.020)  | 0.817<br>0.011***<br>(0.003 - 0.019)    | 0.392<br>0.009<br>(-0.003 - 0.021)   |
| Other thyroid disorders                      | 0.960<br>-0.006*<br>(-0.013 - 0.001)    | 0.023<br>-0.006<br>(-0.018 - 0.005)    | 0.000<br>0.031***<br>(0.016 - 0.047) | 0.041<br>0.008<br>(-0.012 - 0.027)    | 0.025<br>-0.011<br>(-0.027 - 0.005)  | 0.005<br>-0.019***<br>(-0.031 - -0.007) | 0.132<br>0.035***<br>(0.014 - 0.057) |
| Peptic ulcer with bleeding                   | 0.080<br>0.003<br>(-0.006 - 0.012)      | 0.289<br>0.013<br>(-0.004 - 0.030)     | 0.000<br>0.002<br>(-0.028 - 0.031)   | 0.443<br>0.003<br>(-0.025 - 0.031)    | 0.190<br>0.039***<br>(0.015 - 0.062) | 0.002<br>0.015*<br>(-0.002 - 0.033)     | 0.001<br>0.038**<br>(0.007 - 0.070)  |
| Valvular disease                             | 0.526<br>0.001<br>(-0.004 - 0.006)      | 0.132<br>0.001<br>(-0.011 - 0.013)     | 0.920<br>0.021***<br>(0.005 - 0.037) | 0.817<br>-0.011<br>(-0.028 - 0.006)   | 0.001<br>0.027***<br>(0.012 - 0.042) | 0.086<br>0.001<br>(-0.011 - 0.014)      | 0.016<br>0.036***<br>(0.016 - 0.055) |
| Weight loss                                  | 0.665<br>0.011***<br>(0.007 - 0.016)    | 0.886<br>0.014***<br>(0.005 - 0.022)   | 0.010<br>0.020***<br>(0.008 - 0.031) | 0.194<br>-0.002<br>(-0.015 - 0.012)   | 0.000<br>0.022***<br>(0.010 - 0.033) | 0.835<br>0.002<br>(-0.007 - 0.010)      | 0.000<br>0.021***<br>(0.006 - 0.036) |
| Observations                                 | 0.000<br>92,371                         | 0.002<br>92,410                        | 0.001<br>92,181                      | 0.825<br>92,410                       | 0.000<br>92,410                      | 0.705<br>92,410                         | 0.005<br>92,410                      |

Notes: DyDx incremental effects with 95% CI in parentheses, followed by p-value; \*\*\* p<0.01, \*\* p<0.05, \* p<0.1. Incremental effects calculated after logistic regression of outcomes on the covariates listed above and station fixed effects. We dropped age at separation missing (N=1,641) and recoded branch missing to other due to small cell size. Model observation numbers vary because some variable categories were dropped because there were no outcomes by group.

**eTable 7. Descriptive Statistics by Caring letters Receipt**

|                                               | Caring Letters Received          |         |                              |         |                      |         | Std. diff. |
|-----------------------------------------------|----------------------------------|---------|------------------------------|---------|----------------------|---------|------------|
|                                               | No Caring Letters<br>(N=139,576) |         | Caring Letters<br>(N=87,926) |         | Total<br>(N=227,502) |         |            |
| Age in years                                  | 53.12                            | (16.81) | 54.44                        | (17.20) | 53.63                | (16.97) | -0.077     |
| Age at separation in years                    | 25.97                            | (6.70)  | 26.25                        | (6.69)  | 26.08                | (6.70)  | -0.041     |
| Age group                                     |                                  |         |                              |         |                      |         | -0.074     |
| Less than 40                                  | 38,690                           | (27.72) | 22,883                       | (26.03) | 61,573               | (27.06) |            |
| 40-54                                         | 31,477                           | (22.55) | 18,957                       | (21.56) | 50,434               | (22.17) |            |
| 55-64                                         | 30,956                           | (22.18) | 18,302                       | (20.82) | 49,258               | (21.65) |            |
| 65-79                                         | 31,040                           | (22.24) | 22,345                       | (25.41) | 53,385               | (23.47) |            |
| 80+                                           | 7,413                            | (5.31)  | 5,439                        | (6.19)  | 12,852               | (5.65)  |            |
| Sex                                           |                                  |         |                              |         |                      |         | 0.009      |
| Female                                        | 21,644                           | (15.51) | 13,922                       | (15.83) | 35,566               | (15.63) |            |
| Male                                          | 117932                           | (84.49) | 74,004                       | (84.17) | 191936               | (84.37) |            |
| Race                                          |                                  |         |                              |         |                      |         | 0.004      |
| White                                         | 85,262                           | (61.09) | 53,018                       | (60.30) | 138280               | (60.78) |            |
| Black or African American                     | 37,358                           | (26.77) | 23,356                       | (26.56) | 60,714               | (26.69) |            |
| American Indian or Alaska Native              | 1,625                            | (1.16)  | 977                          | (1.11)  | 2,602                | (1.14)  |            |
| Asian                                         | 1,465                            | (1.05)  | 1,026                        | (1.17)  | 2,491                | (1.09)  |            |
| More than one race                            | 1,922                            | (1.38)  | 1,331                        | (1.51)  | 3,253                | (1.43)  |            |
| Native Hawaiian or Other Pacific Islander     | 1,388                            | (0.99)  | 919                          | (1.05)  | 2,307                | (1.01)  |            |
| Unknown                                       | 10,556                           | (7.56)  | 7,299                        | (8.30)  | 17,855               | (7.85)  |            |
| Ethnicity                                     |                                  |         |                              |         |                      |         | -0.027     |
| Hispanic or Latino                            | 10,745                           | (7.70)  | 6,980                        | (7.94)  | 17,725               | (7.79)  |            |
| Not Hispanic or Latino                        | 122289                           | (87.61) | 75,768                       | (86.17) | 198057               | (87.06) |            |
| Unknown                                       | 6,542                            | (4.69)  | 5,178                        | (5.89)  | 11,720               | (5.15)  |            |
| Marital status                                |                                  |         |                              |         |                      |         | 0.015      |
| Married                                       | 49,804                           | (35.68) | 31,837                       | (36.21) | 81,641               | (35.89) |            |
| Single/Never married                          | 32,904                           | (23.57) | 21,181                       | (24.09) | 54,085               | (23.77) |            |
| Divorced/Separated/Widowed                    | 55,032                           | (39.43) | 33,567                       | (38.18) | 88,599               | (38.94) |            |
| Unknown                                       | 1,836                            | (1.32)  | 1,341                        | (1.53)  | 3,177                | (1.40)  |            |
| Branch of service                             |                                  |         |                              |         |                      |         | 0.000      |
| Air Force                                     | 17,321                           | (12.41) | 11,285                       | (12.83) | 28,606               | (12.57) |            |
| Army                                          | 74,551                           | (53.41) | 46,307                       | (52.67) | 120858               | (53.12) |            |
| Navy                                          | 27,129                           | (19.44) | 17,290                       | (19.66) | 44,419               | (19.52) |            |
| Marine Corps                                  | 17,867                           | (12.80) | 11,338                       | (12.89) | 29,205               | (12.84) |            |
| Other and missing                             | 2,708                            | (1.94)  | 1,706                        | (1.94)  | 4,414                | (1.94)  |            |
| Discharge type                                |                                  |         |                              |         |                      |         | 0.004      |
| Honorable                                     | 126,070                          | (90.32) | 79,548                       | (90.47) | 205,618              | (90.38) |            |
| Dishonorable                                  | 974                              | (0.70)  | 543                          | (0.62)  | 1,517                | (0.67)  |            |
| Other                                         | 10,115                           | (7.25)  | 6,326                        | (7.19)  | 16,441               | (7.23)  |            |
| Unknown                                       | 2,417                            | (1.73)  | 1,509                        | (1.72)  | 3,926                | (1.73)  |            |
| Past suicide-related event                    | 8,925                            | (6.39)  | 5,805                        | (6.60)  | 14,730               | (6.47)  | -0.008     |
| Past inpatient mental health stay             | 12,443                           | (8.91)  | 6,489                        | (7.38)  | 18,932               | (8.32)  | 0.056      |
| Past outpatient mental health visit           | 90,593                           | (64.91) | 51,398                       | (58.46) | 141991               | (62.41) | 0.133      |
| Acquired immune deficiency syndrome           | 1,279                            | (0.92)  | 872                          | (0.99)  | 2,151                | (0.95)  | -0.008     |
| Alcohol disorder                              | 37,586                           | (26.93) | 24,317                       | (27.66) | 61,903               | (27.21) | -0.016     |
| Anemias due to other nutritional deficiencies | 14,541                           | (10.42) | 10,271                       | (11.68) | 24,812               | (10.91) | -0.040     |
| Autoimmune conditions                         | 3,462                            | (2.48)  | 2,342                        | (2.66)  | 5,804                | (2.55)  | -0.012     |
| Chronic blood loss (iron deficiency)          | 1,088                            | (0.78)  | 794                          | (0.90)  | 1,882                | (0.83)  | -0.014     |
| Leukemia                                      | 375                              | (0.27)  | 276                          | (0.31)  | 651                  | (0.29)  | -0.008     |
| Lymphoma                                      | 641                              | (0.46)  | 441                          | (0.50)  | 1,082                | (0.48)  | -0.006     |
| Metastatic cancer                             | 850                              | (0.61)  | 592                          | (0.67)  | 1,442                | (0.63)  | -0.008     |
| Solid tumor without metastasis, in situ       | 3,417                            | (2.45)  | 2,480                        | (2.82)  | 5,897                | (2.59)  | -0.023     |
| Solid tumor without metastasis, malignant     | 6,981                            | (5.00)  | 4,974                        | (5.66)  | 11,955               | (5.25)  | -0.029     |
| Cerebrovascular disease - Primary             | 22,784                           | (16.32) | 15,194                       | (17.28) | 37,978               | (16.69) | -0.026     |
| Cerebrovascular disease - Sequela             | 2,588                            | (1.85)  | 1,732                        | (1.97)  | 4,320                | (1.90)  | -0.008     |
| Coagulopathy                                  | 4,058                            | (2.91)  | 2,563                        | (2.91)  | 6,621                | (2.91)  | -0.000     |

|                                               |        |         |        |         |         |         |        |
|-----------------------------------------------|--------|---------|--------|---------|---------|---------|--------|
| Dementia                                      | 4,225  | (3.03)  | 2,649  | (3.01)  | 6,874   | (3.02)  | 0.000  |
| Depression                                    | 74,801 | (53.59) | 49,590 | (56.40) | 124,391 | (54.68) | -0.056 |
| Diabetes with chronic complications           | 18,835 | (13.49) | 12,825 | (14.59) | 31,660  | (13.92) | -0.031 |
| Diabetes without chronic complications        | 24,365 | (17.46) | 16,843 | (19.16) | 41,208  | (18.11) | -0.044 |
| Drug use disorder                             | 31,056 | (22.25) | 19,920 | (22.66) | 50,976  | (22.41) | -0.010 |
| Fluid and electrolyte disorders               | 15,377 | (11.02) | 9,715  | (11.05) | 25,092  | (11.03) | -0.001 |
| Heart failure                                 | 8,028  | (5.75)  | 5,532  | (6.29)  | 13,560  | (5.96)  | -0.023 |
| Homeless                                      | 24,238 | (17.37) | 15,071 | (17.14) | 39,309  | (17.28) | 0.006  |
| Hypertension, complicated                     | 11,417 | (8.18)  | 7,504  | (8.53)  | 18,921  | (8.32)  | -0.013 |
| Hypertension, uncomplicated                   | 57,541 | (41.23) | 38,882 | (44.22) | 96,423  | (42.38) | -0.061 |
| Liver disease, mild                           | 13,013 | (9.32)  | 8,233  | (9.36)  | 21,246  | (9.34)  | -0.001 |
| Liver disease and failure, moderate to severe | 1,211  | (0.87)  | 785    | (0.89)  | 1,996   | (0.88)  | -0.003 |
| Liver disease                                 | 167    | (0.12)  | 108    | (0.12)  | 275     | (0.12)  | -0.001 |
| Chronic pulmonary disease                     | 23,783 | (17.04) | 15,532 | (17.66) | 39,315  | (17.28) | -0.017 |
| Neurological disorders affecting movement     | 4,052  | (2.90)  | 2,900  | (3.30)  | 6,952   | (3.06)  | -0.023 |
| Other neurological disorders                  | 8,413  | (6.03)  | 5,538  | (6.30)  | 13,951  | (6.13)  | -0.011 |
| Seizures and epilepsy                         | 5,586  | (4.00)  | 3,304  | (3.76)  | 8,890   | (3.91)  | 0.013  |
| Obesity                                       | 27,694 | (19.84) | 18,416 | (20.94) | 46,110  | (20.27) | -0.028 |
| Paralysis                                     | 2,279  | (1.63)  | 1,387  | (1.58)  | 3,666   | (1.61)  | 0.004  |
| Peripheral vascular disease                   | 9,848  | (7.06)  | 6,736  | (7.66)  | 16,584  | (7.29)  | -0.023 |
| Psychoses                                     | 36,343 | (26.04) | 24,655 | (28.04) | 60,998  | (26.81) | -0.045 |
| Pulmonary circulation disease                 | 2,224  | (1.59)  | 1,548  | (1.76)  | 3,772   | (1.66)  | -0.013 |
| Renal (kidney) failure and disease, moderate  | 7,271  | (5.21)  | 5,406  | (6.15)  | 12,677  | (5.57)  | -0.041 |
| Renal (kidney) failure and disease, severe    | 1,712  | (1.23)  | 1,178  | (1.34)  | 2,890   | (1.27)  | -0.010 |
| Renal failure                                 | 1,804  | (1.29)  | 1,404  | (1.60)  | 3,208   | (1.41)  | -0.026 |
| Hypothyroidism                                | 9,045  | (6.48)  | 6,199  | (7.05)  | 15,244  | (6.70)  | -0.023 |
| Other thyroid disorders                       | 2,382  | (1.71)  | 1,716  | (1.95)  | 4,098   | (1.80)  | -0.018 |
| Peptic ulcer with bleeding                    | 1,494  | (1.07)  | 906    | (1.03)  | 2,400   | (1.05)  | 0.004  |
| Valvular disease                              | 3,720  | (2.67)  | 2,435  | (2.77)  | 6,155   | (2.71)  | -0.006 |
| Weight loss                                   | 5,868  | (4.20)  | 4,062  | (4.62)  | 9,930   | (4.36)  | -0.020 |



**eTable 8.** Rates of All Outcomes for Letters vs No Letters Comparison

| <b>Outcome (one year forward)</b>                             | <b>Total Sample<br/>(N=227,502)</b> | <b>No Caring Letters<br/>(N=139,576)</b> | <b>Caring Letters<br/>(N=87,926)</b> | <b>P-value<sup>+</sup></b> |
|---------------------------------------------------------------|-------------------------------------|------------------------------------------|--------------------------------------|----------------------------|
| <b>Any Nonfatal suicide attempt and intentional self-harm</b> |                                     |                                          |                                      |                            |
| At least one event, n (%)                                     | 17,703 (7.78)                       | 10,905 (7.81)                            | 6,798 (7.73)                         | 0.480                      |
| Frequency, Mean (std. dev)                                    | 0.22 (1.55)                         | 0.22 (1.55)                              | 0.22 (1.55)                          | 0.509                      |
| <b>All-cause mortality</b>                                    |                                     |                                          |                                      |                            |
| All-cause mortality, n (%)                                    | 9,477 (4.17)                        | 5,607 (4.02)                             | 3,870 (4.40)                         | 0.000                      |
| <b>Any outpatient utilization</b>                             |                                     |                                          |                                      |                            |
| At least one visit, n (%)                                     | 217,095 (95.43)                     | 132,777 (95.13)                          | 84,318 (95.90)                       | 0.000                      |
| Visit count, mean (std. dev)                                  | 22.74 (22.66)                       | 22.34 (22.44)                            | 23.38 (23.00)                        | 0.000                      |
| <b>Outpatient mental health utilization</b>                   |                                     |                                          |                                      |                            |
| At least one visit, n (%)                                     | 167,191 (73.49)                     | 104,816 (75.10)                          | 62,375 (70.94)                       | 0.000                      |
| Visit count, mean (std. dev)                                  | 9.50 (15.70)                        | 9.76 (15.78)                             | 9.09 (15.56)                         | 0.000                      |
| <b>Any inpatient utilization</b>                              |                                     |                                          |                                      |                            |
| At least one visit, n (%)                                     | 51,059 (22.44)                      | 32,173 (23.05)                           | 18,886 (21.48)                       | 0.000                      |
| Visit count, mean (std. dev)                                  | 0.50 (1.38)                         | 0.51 (1.39)                              | 0.48 (1.37)                          | 0.000                      |
| <b>Inpatient mental health utilization</b>                    |                                     |                                          |                                      |                            |
| At least one visit, n (%)                                     | 26,590 (11.69)                      | 17,042 (12.21)                           | 9,548 (10.86)                        | 0.000                      |
| Visit count, mean (std. dev)                                  | 0.20 (0.74)                         | 0.20 (0.75)                              | 0.19 (0.72)                          | 0.000                      |
| <b>Emergency department utilization</b>                       |                                     |                                          |                                      |                            |
| At least one visit, n (%)                                     | 90,735 (39.88)                      | 56,183 (40.25)                           | 34,552 (39.30)                       | 0.000                      |
| Visit count, mean (std. dev)                                  | 2.38 (5.29)                         | 2.81 (5.99)                              | 1.71 (3.84)                          | 0.000                      |

**Notes:** <sup>+</sup>Chi-squared test was used for categorical variables, Wilcoxon rank-sum test was used for frequencies.

**eTable 9.** Hazard Ratios from Time-to-Event Analyses of Association between Outcomes and Caring Letters Receipt, Full Sample

| VARIABLES                      | All-Cause Mortality                          | Suicide Attempt                             | Inpatient                                   | Inpatient Mental Health                     | Outpatient                                  | Outpatient Mental Health Care               | Emergency Department Use                    |
|--------------------------------|----------------------------------------------|---------------------------------------------|---------------------------------------------|---------------------------------------------|---------------------------------------------|---------------------------------------------|---------------------------------------------|
| <b>Caring Letters Received</b> | 1.067<br>(0.962 - 1.184)                     | 1.016<br>(0.946 - 1.091)                    | <b>1.127***</b><br><b>(1.079 - 1.177)</b>   | <b>1.137***</b><br><b>(1.072 - 1.206)</b>   | <b>1.105***</b><br><b>(1.084 - 1.127)</b>   | <b>1.195***</b><br><b>(1.168 - 1.223)</b>   | <b>1.107***</b><br><b>(1.072 - 1.144)</b>   |
| Call during COVID Period       | 0.219<br>0.873*<br>(0.761 - 1.001)           | 0.670<br>0.892**<br>(0.809 - 0.983)         | <b>0.000</b><br>0.903***<br>(0.852 - 0.957) | <b>0.000</b><br>0.932*<br>(0.860 - 1.011)   | <b>0.000</b><br>0.799***<br>(0.778 - 0.821) | <b>0.000</b><br>0.707***<br>(0.685 - 0.731) | <b>0.000</b><br>1.023<br>(0.979 - 1.069)    |
| Call within prior year         | 0.051<br><b>1.138***</b><br>(1.075 - 1.204)  | 0.021<br><b>1.082***</b><br>(1.043 - 1.122) | 0.001<br><b>1.093***</b><br>(1.069 - 1.117) | 0.089<br><b>1.093***</b><br>(1.062 - 1.125) | 0.000<br><b>0.968***</b><br>(0.957 - 0.979) | 0.000<br><b>1.006</b><br>(0.993 - 1.018)    | 0.310<br><b>1.105***</b><br>(1.086 - 1.124) |
| Age 40-54                      | 0.000<br><b>1.703***</b><br>(1.526 - 1.901)  | 0.000<br><b>0.851***</b><br>(0.816 - 0.887) | 0.000<br><b>1.081***</b><br>(1.050 - 1.113) | 0.000<br>0.972<br>(0.938 - 1.007)           | 0.000<br><b>1.019***</b><br>(1.006 - 1.033) | 0.380<br><b>0.962***</b><br>(0.948 - 0.975) | 0.000<br>0.986<br>(0.966 - 1.006)           |
| Age 55-64                      | 0.000<br><b>3.005***</b><br>(2.714 - 3.327)  | 0.000<br><b>0.696***</b><br>(0.663 - 0.731) | 0.000<br><b>1.046***</b><br>(1.015 - 1.079) | 0.121<br><b>0.896***</b><br>(0.862 - 0.931) | 0.004<br>0.994<br>(0.980 - 1.008)           | 0.000<br><b>0.835***</b><br>(0.822 - 0.848) | 0.177<br><b>0.932***</b><br>(0.911 - 0.953) |
| Age 65-79                      | 0.000<br><b>4.488***</b><br>(4.056 - 4.965)  | 0.000<br><b>0.466***</b><br>(0.438 - 0.495) | 0.060<br><b>0.969*</b><br>(0.937 - 1.001)   | 0.000<br><b>0.675***</b><br>(0.643 - 0.707) | 0.000<br><b>0.955***</b><br>(0.941 - 0.969) | 0.000<br><b>0.630***</b><br>(0.619 - 0.641) | 0.000<br><b>0.826***</b><br>(0.805 - 0.847) |
| Age over 80                    | 0.000<br><b>9.265***</b><br>(8.286 - 10.360) | 0.000<br><b>0.210***</b><br>(0.179 - 0.246) | 0.000<br><b>0.928***</b><br>(0.880 - 0.979) | 0.000<br><b>0.234***</b><br>(0.202 - 0.271) | 0.000<br><b>0.903***</b><br>(0.884 - 0.923) | 0.000<br><b>0.304***</b><br>(0.294 - 0.316) | 0.000<br><b>0.736***</b><br>(0.707 - 0.766) |
| Female                         | 0.000<br><b>0.564***</b><br>(0.511 - 0.622)  | 0.000<br><b>0.970</b><br>(0.929 - 1.013)    | 0.006<br><b>0.808***</b><br>(0.785 - 0.832) | 0.000<br><b>0.824***</b><br>(0.793 - 0.856) | 0.000<br><b>1.083***</b><br>(1.070 - 1.097) | 0.000<br><b>1.078***</b><br>(1.064 - 1.093) | 0.000<br><b>0.999</b><br>(0.980 - 1.020)    |
| American Indian                | 0.000<br>1.071<br>(0.876 - 1.310)            | 0.175<br>1.037<br>(0.916 - 1.173)           | 0.000<br>0.999<br>(0.919 - 1.086)           | 0.000<br>0.907<br>(0.806 - 1.020)           | 0.000<br><b>0.943***</b><br>(0.905 - 0.982) | 0.000<br><b>0.957*</b><br>(0.915 - 1.002)   | 0.959<br>0.953<br>(0.891 - 1.019)           |
| Asian                          | 0.501<br><b>0.726**</b><br>(0.546 - 0.965)   | 0.569<br>1.039<br>(0.906 - 1.191)           | 0.987<br><b>0.833***</b><br>(0.747 - 0.928) | 0.105<br>0.987<br>(0.864 - 1.129)           | 0.005<br>0.986<br>(0.947 - 1.026)           | 0.059<br><b>0.938***</b><br>(0.894 - 0.985) | 0.156<br><b>0.924**</b><br>(0.860 - 0.992)  |
| Black                          | 0.028<br><b>0.641***</b><br>(0.604 - 0.681)  | 0.584<br><b>0.822***</b><br>(0.788 - 0.858) | 0.001<br><b>0.960***</b><br>(0.937 - 0.982) | 0.854<br>0.998<br>(0.966 - 1.030)           | 0.481<br>0.998<br>(0.988 - 1.009)           | 0.010<br><b>1.011*</b><br>(0.999 - 1.024)   | 0.030<br><b>1.172***</b><br>(1.152 - 1.192) |
| More than one race             | 0.000<br><b>0.706***</b><br>(0.559 - 0.893)  | 0.000<br>0.921<br>(0.815 - 1.040)           | 0.001<br><b>0.926*</b><br>(0.854 - 1.004)   | 0.887<br>0.937<br>(0.842 - 1.042)           | 0.744<br>0.998<br>(0.963 - 1.034)           | 0.076<br><b>1.016</b><br>(0.975 - 1.058)    | 0.000<br><b>1.034</b><br>(0.975 - 1.096)    |
|                                | 0.004                                        | 0.184                                       | 0.063                                       | 0.227                                       | 0.903                                       | 0.455                                       | 0.262                                       |

|                            |                 |                 |                 |                 |                 |                 |                 |
|----------------------------|-----------------|-----------------|-----------------|-----------------|-----------------|-----------------|-----------------|
| Native Hawaiian            | 0.755**         | 0.996           | 0.924           | 0.934           | 1.047**         | 0.983           | 0.980           |
|                            | (0.591 - 0.965) | (0.860 - 1.153) | (0.831 - 1.027) | (0.816 - 1.070) | (1.005 - 1.091) | (0.937 - 1.031) | (0.909 - 1.055) |
| Unknown race               | 0.025           | 0.957           | 0.141           | 0.325           | 0.029           | 0.479           | 0.585           |
|                            | 0.919*          | 0.933**         | 0.947**         | 0.952*          | 0.936***        | 0.930***        | 1.004           |
| Non-Hispanic               | (0.838 - 1.008) | (0.873 - 0.996) | (0.908 - 0.987) | (0.899 - 1.008) | (0.919 - 0.953) | (0.911 - 0.950) | (0.974 - 1.036) |
|                            | 0.073           | 0.037           | 0.010           | 0.093           | 0.000           | 0.000           | 0.790           |
| Unknown Ethnicity          | 1.145***        | 0.956           | 1.044**         | 1.060**         | 0.982**         | 0.967***        | 0.940***        |
|                            | (1.035 - 1.268) | (0.903 - 1.013) | (1.004 - 1.085) | (1.006 - 1.117) | (0.966 - 0.999) | (0.948 - 0.986) | (0.914 - 0.966) |
| Never Married              | 0.009           | 0.127           | 0.029           | 0.028           | 0.038           | 0.001           | 0.000           |
|                            | 1.258***        | 1.020           | 0.992           | 1.075*          | 0.860***        | 0.930***        | 0.860***        |
| Divorced/Separated/Widowed | (1.090 - 1.453) | (0.930 - 1.120) | (0.933 - 1.056) | (0.989 - 1.169) | (0.837 - 0.884) | (0.902 - 0.959) | (0.822 - 0.900) |
|                            | 0.002           | 0.670           | 0.810           | 0.091           | 0.000           | 0.000           | 0.000           |
| Marital Status Missing     | 1.220***        | 0.979           | 1.183***        | 1.172***        | 0.980***        | 0.981***        | 1.165***        |
|                            | (1.142 - 1.304) | (0.939 - 1.021) | (1.152 - 1.214) | (1.132 - 1.214) | (0.969 - 0.992) | (0.968 - 0.994) | (1.143 - 1.188) |
| Army                       | 0.000           | 0.325           | 0.000           | 0.000           | 0.001           | 0.005           | 0.000           |
|                            | 1.209***        | 1.027           | 1.195***        | 1.151***        | 0.995           | 0.984***        | 1.167***        |
| Navy                       | (1.152 - 1.269) | (0.989 - 1.067) | (1.168 - 1.222) | (1.115 - 1.189) | (0.985 - 1.005) | (0.973 - 0.996) | (1.148 - 1.187) |
|                            | 0.000           | 0.159           | 0.000           | 0.000           | 0.300           | 0.008           | 0.000           |
| Marine Corps               | 1.338**         | 0.973           | 0.647***        | 0.668***        | 0.787***        | 0.903***        | 0.656***        |
|                            | (1.054 - 1.698) | (0.837 - 1.132) | (0.565 - 0.741) | (0.560 - 0.796) | (0.753 - 0.824) | (0.858 - 0.950) | (0.600 - 0.717) |
| Others and missing         | 0.017           | 0.723           | 0.000           | 0.000           | 0.000           | 0.000           | 0.000           |
|                            | 1.001           | 0.972           | 0.996           | 1.003           | 0.972***        | 0.958***        | 0.993           |
| Age at separation (Q2)     | (0.940 - 1.067) | (0.924 - 1.022) | (0.968 - 1.025) | (0.963 - 1.045) | (0.960 - 0.985) | (0.943 - 0.973) | (0.971 - 1.014) |
|                            | 0.963           | 0.264           | 0.806           | 0.882           | 0.000           | 0.000           | 0.510           |
| Age at separation (Q3)     | 0.996           | 0.996           | 0.983           | 0.980           | 0.983**         | 0.976***        | 0.992           |
|                            | (0.926 - 1.071) | (0.941 - 1.055) | (0.951 - 1.016) | (0.936 - 1.027) | (0.968 - 0.998) | (0.959 - 0.994) | (0.968 - 1.017) |
| Age at separation (Q4)     | 0.919           | 0.893           | 0.298           | 0.401           | 0.025           | 0.007           | 0.525           |
|                            | 0.979           | 1.024           | 0.995           | 0.993           | 0.962***        | 0.965***        | 0.976*          |
| Age at separation (Q1)     | (0.900 - 1.064) | (0.963 - 1.089) | (0.959 - 1.032) | (0.943 - 1.045) | (0.946 - 0.979) | (0.946 - 0.984) | (0.950 - 1.004) |
|                            | 0.617           | 0.454           | 0.779           | 0.775           | 0.000           | 0.000           | 0.088           |
| Age at separation (Q4)     | 1.089           | 0.954           | 0.978           | 0.993           | 0.955**         | 0.982           | 0.992           |
|                            | (0.896 - 1.322) | (0.822 - 1.107) | (0.894 - 1.070) | (0.879 - 1.122) | (0.917 - 0.995) | (0.937 - 1.030) | (0.926 - 1.063) |
| Age at separation (Q2)     | 0.391           | 0.532           | 0.631           | 0.911           | 0.027           | 0.455           | 0.823           |
|                            | 1.044           | 0.949**         | 0.996           | 0.985           | 1.008           | 1.005           | 0.970***        |
| Age at separation (Q3)     | (0.989 - 1.102) | (0.909 - 0.992) | (0.972 - 1.021) | (0.951 - 1.019) | (0.996 - 1.020) | (0.991 - 1.019) | (0.951 - 0.988) |
|                            | 0.122           | 0.021           | 0.777           | 0.384           | 0.179           | 0.520           | 0.001           |
| Age at separation (Q4)     | 1.027           | 0.957*          | 0.998           | 0.991           | 1.016**         | 1.009           | 0.963***        |
|                            | (0.968 - 1.090) | (0.916 - 1.001) | (0.973 - 1.024) | (0.956 - 1.026) | (1.004 - 1.028) | (0.995 - 1.024) | (0.945 - 0.982) |
| Age at separation (Q1)     | 0.377           | 0.053           | 0.908           | 0.604           | 0.010           | 0.202           | 0.000           |
|                            | 0.986           | 0.917***        | 0.940***        | 0.949***        | 1.029***        | 1.036***        | 0.912***        |

|                                               |                 |                 |                 |                 |                 |                 |                 |
|-----------------------------------------------|-----------------|-----------------|-----------------|-----------------|-----------------|-----------------|-----------------|
|                                               | (0.925 - 1.052) | (0.875 - 0.961) | (0.915 - 0.967) | (0.913 - 0.986) | (1.016 - 1.042) | (1.021 - 1.051) | (0.893 - 0.930) |
|                                               | 0.676           | 0.000           | 0.000           | 0.007           | 0.000           | 0.000           | 0.000           |
| Dishonorable                                  | 1.027           | 1.136           | 0.985           | 1.039           | 0.784***        | 0.879***        | 1.109**         |
|                                               | (0.746 - 1.413) | (0.942 - 1.370) | (0.869 - 1.117) | (0.894 - 1.207) | (0.736 - 0.835) | (0.823 - 0.940) | (1.010 - 1.217) |
|                                               | 0.872           | 0.180           | 0.811           | 0.620           | 0.000           | 0.000           | 0.029           |
| Other discharge                               | 1.075           | 1.137***        | 1.089***        | 1.101***        | 0.974***        | 0.998           | 1.052***        |
|                                               | (0.974 - 1.185) | (1.080 - 1.197) | (1.053 - 1.127) | (1.056 - 1.148) | (0.957 - 0.990) | (0.980 - 1.016) | (1.025 - 1.080) |
|                                               | 0.150           | 0.000           | 0.000           | 0.000           | 0.002           | 0.817           | 0.000           |
| Unknown discharge                             | 0.976           | 1.044           | 0.931           | 0.929           | 0.966           | 0.981           | 0.941           |
|                                               | (0.777 - 1.224) | (0.892 - 1.222) | (0.839 - 1.034) | (0.804 - 1.074) | (0.925 - 1.009) | (0.932 - 1.033) | (0.874 - 1.013) |
|                                               | 0.832           | 0.589           | 0.180           | 0.321           | 0.121           | 0.463           | 0.107           |
| Acquired immune deficiency syndrome           | 0.880           | 1.229***        | 1.135***        | 1.161***        | 1.119***        | 1.008           | 1.236***        |
|                                               | (0.707 - 1.095) | (1.083 - 1.396) | (1.054 - 1.222) | (1.054 - 1.278) | (1.076 - 1.164) | (0.962 - 1.056) | (1.167 - 1.310) |
|                                               | 0.251           | 0.001           | 0.001           | 0.002           | 0.000           | 0.746           | 0.000           |
| Alcohol disorder                              | 1.246***        | 1.207***        | 1.441***        | 1.321***        | 1.018***        | 1.047***        | 1.096***        |
|                                               | (1.177 - 1.319) | (1.163 - 1.253) | (1.410 - 1.474) | (1.281 - 1.362) | (1.007 - 1.030) | (1.034 - 1.060) | (1.077 - 1.115) |
|                                               | 0.000           | 0.000           | 0.000           | 0.000           | 0.001           | 0.000           | 0.000           |
| Anemias due to other nutritional deficiencies | 1.184***        | 1.042           | 1.123***        | 1.028           | 1.037***        | 0.989           | 1.087***        |
|                                               | (1.118 - 1.254) | (0.988 - 1.100) | (1.093 - 1.154) | (0.988 - 1.070) | (1.023 - 1.052) | (0.972 - 1.006) | (1.063 - 1.111) |
|                                               | 0.000           | 0.133           | 0.000           | 0.171           | 0.000           | 0.192           | 0.000           |
| Autoimmune conditions                         | 0.980           | 1.019           | 1.083***        | 0.937*          | 1.153***        | 1.028*          | 1.163***        |
|                                               | (0.873 - 1.100) | (0.926 - 1.121) | (1.031 - 1.139) | (0.866 - 1.013) | (1.126 - 1.180) | (0.998 - 1.058) | (1.119 - 1.210) |
|                                               | 0.736           | 0.706           | 0.002           | 0.099           | 0.000           | 0.070           | 0.000           |
| Chronic blood loss (iron deficiency)          | 1.099           | 0.895           | 1.076*          | 0.966           | 0.998           | 0.982           | 1.022           |
|                                               | (0.952 - 1.267) | (0.748 - 1.070) | (0.997 - 1.162) | (0.849 - 1.098) | (0.955 - 1.043) | (0.932 - 1.036) | (0.958 - 1.090) |
|                                               | 0.197           | 0.223           | 0.060           | 0.595           | 0.925           | 0.507           | 0.515           |
| Leukemia                                      | 1.339**         | 0.683*          | 1.059           | 0.604***        | 1.036           | 1.051           | 1.018           |
|                                               | (1.069 - 1.678) | (0.442 - 1.056) | (0.910 - 1.233) | (0.441 - 0.827) | (0.959 - 1.120) | (0.955 - 1.158) | (0.902 - 1.148) |
|                                               | 0.011           | 0.086           | 0.458           | 0.002           | 0.364           | 0.309           | 0.778           |
| Lymphoma                                      | 1.365***        | 0.741*          | 1.147**         | 0.791**         | 1.099***        | 0.930*          | 1.153***        |
|                                               | (1.136 - 1.639) | (0.548 - 1.003) | (1.027 - 1.282) | (0.638 - 0.980) | (1.039 - 1.163) | (0.862 - 1.003) | (1.056 - 1.259) |
|                                               | 0.001           | 0.053           | 0.015           | 0.032           | 0.001           | 0.061           | 0.002           |
| Metastatic cancer                             | 3.190***        | 0.923           | 1.372***        | 0.854           | 1.149***        | 0.858***        | 1.249***        |
|                                               | (2.828 - 3.597) | (0.705 - 1.209) | (1.242 - 1.516) | (0.694 - 1.051) | (1.091 - 1.211) | (0.798 - 0.922) | (1.153 - 1.354) |
|                                               | 0.000           | 0.562           | 0.000           | 0.137           | 0.000           | 0.000           | 0.000           |
| Solid tumor without metastasis, in situ       | 1.048           | 0.944           | 0.988           | 0.961           | 1.065***        | 0.987           | 0.998           |
|                                               | (0.954 - 1.151) | (0.823 - 1.083) | (0.932 - 1.047) | (0.869 - 1.064) | (1.037 - 1.094) | (0.953 - 1.022) | (0.954 - 1.044) |
|                                               | 0.328           | 0.414           | 0.682           | 0.447           | 0.000           | 0.465           | 0.926           |
| Solid tumor without metastasis, malignant     | 1.334***        | 0.871***        | 1.153***        | 0.946           | 1.112***        | 0.972**         | 1.165***        |
|                                               | (1.244 - 1.431) | (0.790 - 0.960) | (1.107 - 1.201) | (0.882 - 1.014) | (1.091 - 1.134) | (0.947 - 0.998) | (1.128 - 1.203) |

|                                        |                 |                 |                 |                 |                 |                 |                 |
|----------------------------------------|-----------------|-----------------|-----------------|-----------------|-----------------|-----------------|-----------------|
|                                        | 0.000           | 0.006           | 0.000           | 0.114           | 0.000           | 0.032           | 0.000           |
| Cerebrovascular disease - Primary      | 1.132***        | 1.021           | 1.183***        | 1.059***        | 1.081***        | 0.991           | 1.160***        |
|                                        | (1.074 - 1.194) | (0.976 - 1.068) | (1.155 - 1.212) | (1.023 - 1.096) | (1.068 - 1.094) | (0.977 - 1.006) | (1.138 - 1.182) |
|                                        | 0.000           | 0.372           | 0.000           | 0.001           | 0.000           | 0.241           | 0.000           |
| Cerebrovascular disease - Sequela      | 0.944           | 0.977           | 0.969           | 0.984           | 0.986           | 1.036*          | 1.012           |
|                                        | (0.828 - 1.077) | (0.855 - 1.117) | (0.907 - 1.035) | (0.887 - 1.091) | (0.952 - 1.021) | (0.994 - 1.081) | (0.960 - 1.068) |
|                                        | 0.393           | 0.738           | 0.351           | 0.759           | 0.433           | 0.097           | 0.649           |
| Coagulopathy                           | 1.276***        | 0.946           | 1.218***        | 1.062*          | 1.043***        | 0.993           | 1.134***        |
|                                        | (1.174 - 1.388) | (0.864 - 1.036) | (1.168 - 1.269) | (0.996 - 1.132) | (1.017 - 1.069) | (0.964 - 1.022) | (1.093 - 1.176) |
|                                        | 0.000           | 0.235           | 0.000           | 0.067           | 0.001           | 0.621           | 0.000           |
| Dementia                               | 1.224***        | 1.035           | 1.092***        | 1.164***        | 0.945***        | 1.039**         | 1.036*          |
|                                        | (1.128 - 1.328) | (0.936 - 1.144) | (1.043 - 1.143) | (1.086 - 1.248) | (0.921 - 0.969) | (1.008 - 1.070) | (0.996 - 1.076) |
|                                        | 0.000           | 0.503           | 0.000           | 0.000           | 0.000           | 0.014           | 0.075           |
| Depression                             | 0.891***        | 1.225***        | 1.040***        | 1.003           | 1.102***        | 1.162***        | 1.066***        |
|                                        | (0.848 - 0.936) | (1.179 - 1.273) | (1.018 - 1.063) | (0.972 - 1.035) | (1.092 - 1.113) | (1.149 - 1.175) | (1.049 - 1.083) |
|                                        | 0.000           | 0.000           | 0.000           | 0.836           | 0.000           | 0.000           | 0.000           |
| Diabetes with chronic complications    | 1.261***        | 1.045           | 1.135***        | 0.990           | 1.071***        | 0.980**         | 1.134***        |
|                                        | (1.175 - 1.353) | (0.976 - 1.119) | (1.097 - 1.174) | (0.940 - 1.044) | (1.054 - 1.088) | (0.961 - 0.999) | (1.105 - 1.164) |
|                                        | 0.000           | 0.209           | 0.000           | 0.717           | 0.000           | 0.042           | 0.000           |
| Diabetes without chronic complications | 1.000           | 0.973           | 1.007           | 0.987           | 1.047***        | 0.998           | 1.012           |
|                                        | (0.935 - 1.069) | (0.915 - 1.034) | (0.976 - 1.039) | (0.942 - 1.034) | (1.032 - 1.061) | (0.980 - 1.015) | (0.988 - 1.036) |
|                                        | 0.999           | 0.375           | 0.643           | 0.585           | 0.000           | 0.792           | 0.345           |
| Drug use disorder                      | 1.025           | 1.127***        | 1.356***        | 1.418***        | 1.055***        | 1.065***        | 1.215***        |
|                                        | (0.962 - 1.092) | (1.083 - 1.173) | (1.325 - 1.388) | (1.373 - 1.465) | (1.042 - 1.067) | (1.051 - 1.079) | (1.193 - 1.237) |
|                                        | 0.441           | 0.000           | 0.000           | 0.000           | 0.000           | 0.000           | 0.000           |
| Fluid and electrolyte disorders        | 1.280***        | 1.101***        | 1.400***        | 1.154***        | 1.033***        | 1.009           | 1.347***        |
|                                        | (1.206 - 1.358) | (1.049 - 1.156) | (1.365 - 1.437) | (1.113 - 1.196) | (1.018 - 1.048) | (0.992 - 1.026) | (1.319 - 1.376) |
|                                        | 0.000           | 0.000           | 0.000           | 0.000           | 0.000           | 0.312           | 0.000           |
| Heart failure                          | 1.573***        | 1.040           | 1.216***        | 0.945*          | 1.028***        | 0.949***        | 1.094***        |
|                                        | (1.472 - 1.681) | (0.955 - 1.132) | (1.172 - 1.261) | (0.887 - 1.007) | (1.008 - 1.048) | (0.925 - 0.973) | (1.061 - 1.128) |
|                                        | 0.000           | 0.367           | 0.000           | 0.082           | 0.006           | 0.000           | 0.000           |
| Homeless                               | 1.054           | 1.030           | 1.235***        | 1.279***        | 0.974***        | 1.061***        | 1.185***        |
|                                        | (0.989 - 1.124) | (0.991 - 1.071) | (1.207 - 1.264) | (1.241 - 1.318) | (0.962 - 0.986) | (1.047 - 1.076) | (1.164 - 1.207) |
|                                        | 0.108           | 0.137           | 0.000           | 0.000           | 0.000           | 0.000           | 0.000           |
| Hypertension, complicated              | 0.995           | 1.071*          | 1.128***        | 1.042           | 1.020**         | 0.998           | 1.071***        |
|                                        | (0.929 - 1.066) | (0.996 - 1.151) | (1.090 - 1.167) | (0.988 - 1.099) | (1.002 - 1.038) | (0.977 - 1.021) | (1.041 - 1.101) |
|                                        | 0.886           | 0.065           | 0.000           | 0.132           | 0.028           | 0.878           | 0.000           |
| Hypertension, uncomplicated            | 1.003           | 0.958**         | 1.083***        | 0.971*          | 1.106***        | 0.984***        | 1.074***        |
|                                        | (0.952 - 1.057) | (0.921 - 0.995) | (1.059 - 1.107) | (0.942 - 1.001) | (1.095 - 1.118) | (0.972 - 0.996) | (1.056 - 1.092) |
|                                        | 0.906           | 0.028           | 0.000           | 0.060           | 0.000           | 0.008           | 0.000           |

|                                               |                             |                             |                             |                             |                             |                             |                             |
|-----------------------------------------------|-----------------------------|-----------------------------|-----------------------------|-----------------------------|-----------------------------|-----------------------------|-----------------------------|
| Liver disease, mild                           | 1.258***<br>(1.180 - 1.341) | 1.019<br>(0.967 - 1.074)    | 1.201***<br>(1.169 - 1.234) | 1.098***<br>(1.057 - 1.139) | 1.057***<br>(1.042 - 1.073) | 1.025***<br>(1.008 - 1.043) | 1.167***<br>(1.141 - 1.193) |
|                                               | 0.000                       | 0.472                       | 0.000                       | 0.000                       | 0.000                       | 0.004                       | 0.000                       |
| Liver disease and failure, moderate to severe | 1.717***<br>(1.510 - 1.952) | 0.888<br>(0.755 - 1.045)    | 1.035<br>(0.964 - 1.111)    | 0.905*<br>(0.807 - 1.015)   | 0.991<br>(0.947 - 1.037)    | 0.916***<br>(0.869 - 0.966) | 1.024<br>(0.961 - 1.091)    |
|                                               | 0.000                       | 0.153                       | 0.347                       | 0.087                       | 0.692                       | 0.001                       | 0.468                       |
| Liver disease                                 | 1.284*<br>(0.954 - 1.728)   | 0.866<br>(0.613 - 1.224)    | 1.032<br>(0.872 - 1.220)    | 0.873<br>(0.670 - 1.138)    | 0.923<br>(0.826 - 1.031)    | 0.908<br>(0.807 - 1.020)    | 0.964<br>(0.825 - 1.127)    |
|                                               | 0.099                       | 0.415                       | 0.716                       | 0.317                       | 0.157                       | 0.105                       | 0.647                       |
| Chronic pulmonary disease                     | 1.239***<br>(1.180 - 1.301) | 1.063***<br>(1.019 - 1.109) | 1.079***<br>(1.055 - 1.104) | 1.025<br>(0.992 - 1.059)    | 1.083***<br>(1.071 - 1.095) | 1.026***<br>(1.012 - 1.040) | 1.131***<br>(1.111 - 1.151) |
|                                               | 0.000                       | 0.005                       | 0.000                       | 0.136                       | 0.000                       | 0.000                       | 0.000                       |
| Neurological disorders affecting movement     | 0.994<br>(0.903 - 1.096)    | 1.077*<br>(0.993 - 1.168)   | 1.092***<br>(1.044 - 1.142) | 1.178***<br>(1.108 - 1.253) | 1.071***<br>(1.047 - 1.096) | 1.095***<br>(1.066 - 1.124) | 1.095***<br>(1.055 - 1.136) |
|                                               | 0.911                       | 0.073                       | 0.000                       | 0.000                       | 0.000                       | 0.000                       | 0.000                       |
| Other neurological disorders                  | 1.037<br>(0.966 - 1.113)    | 1.016<br>(0.954 - 1.082)    | 1.028*<br>(0.995 - 1.063)   | 1.005<br>(0.958 - 1.055)    | 1.044***<br>(1.026 - 1.063) | 1.041***<br>(1.020 - 1.063) | 1.078***<br>(1.049 - 1.107) |
|                                               | 0.318                       | 0.630                       | 0.098                       | 0.833                       | 0.000                       | 0.000                       | 0.000                       |
| Seizures and epilepsy                         | 1.206***<br>(1.102 - 1.320) | 1.087**<br>(1.018 - 1.160)  | 1.066***<br>(1.027 - 1.107) | 1.014<br>(0.964 - 1.067)    | 1.040***<br>(1.019 - 1.062) | 0.978*<br>(0.955 - 1.001)   | 1.041**<br>(1.008 - 1.075)  |
|                                               | 0.000                       | 0.013                       | 0.001                       | 0.583                       | 0.000                       | 0.064                       | 0.014                       |
| Obesity                                       | 0.833***<br>(0.788 - 0.880) | 0.972<br>(0.935 - 1.010)    | 0.995<br>(0.973 - 1.017)    | 0.987<br>(0.957 - 1.018)    | 1.111***<br>(1.100 - 1.123) | 1.067***<br>(1.055 - 1.080) | 1.086***<br>(1.068 - 1.104) |
|                                               | 0.000                       | 0.151                       | 0.668                       | 0.397                       | 0.000                       | 0.000                       | 0.000                       |
| Paralysis                                     | 1.142*<br>(0.990 - 1.317)   | 1.060<br>(0.927 - 1.211)    | 1.113***<br>(1.038 - 1.193) | 0.857***<br>(0.769 - 0.956) | 1.012<br>(0.973 - 1.052)    | 0.863***<br>(0.825 - 0.903) | 1.030<br>(0.974 - 1.090)    |
|                                               | 0.068                       | 0.395                       | 0.003                       | 0.005                       | 0.561                       | 0.000                       | 0.304                       |
| Peripheral vascular disease                   | 1.131***<br>(1.066 - 1.200) | 0.952<br>(0.886 - 1.022)    | 1.122***<br>(1.088 - 1.158) | 0.902***<br>(0.855 - 0.952) | 1.105***<br>(1.088 - 1.123) | 0.994<br>(0.974 - 1.014)    | 1.129***<br>(1.101 - 1.159) |
|                                               | 0.000                       | 0.175                       | 0.000                       | 0.000                       | 0.000                       | 0.547                       | 0.000                       |
| Psychoses                                     | 1.008<br>(0.954 - 1.064)    | 1.187***<br>(1.146 - 1.229) | 1.216***<br>(1.191 - 1.242) | 1.539***<br>(1.496 - 1.584) | 1.070***<br>(1.059 - 1.081) | 1.184***<br>(1.171 - 1.197) | 1.141***<br>(1.123 - 1.160) |
|                                               | 0.780                       | 0.000                       | 0.000                       | 0.000                       | 0.000                       | 0.000                       | 0.000                       |
| Pulmonary circulation disease                 | 1.260***<br>(1.143 - 1.389) | 1.081<br>(0.958 - 1.220)    | 1.149***<br>(1.087 - 1.214) | 1.001<br>(0.912 - 1.099)    | 1.063***<br>(1.030 - 1.097) | 1.023<br>(0.985 - 1.063)    | 1.136***<br>(1.084 - 1.190) |
|                                               | 0.000                       | 0.205                       | 0.000                       | 0.982                       | 0.000                       | 0.232                       | 0.000                       |
| Renal (kidney) failure and disease, moderate  | 1.023<br>(0.951 - 1.102)    | 0.948<br>(0.867 - 1.037)    | 1.027<br>(0.987 - 1.068)    | 0.986<br>(0.923 - 1.053)    | 1.028***<br>(1.009 - 1.048) | 0.999<br>(0.975 - 1.025)    | 1.010<br>(0.978 - 1.042)    |
|                                               | 0.540                       | 0.245                       | 0.188                       | 0.672                       | 0.005                       | 0.962                       | 0.547                       |
| Renal (kidney) failure and                    | 1.983***                    | 0.645***                    | 1.249***                    | 0.654***                    | 1.061***                    | 0.903***                    | 1.078***                    |

|                                             |                 |                 |                 |                 |                 |                 |                 |
|---------------------------------------------|-----------------|-----------------|-----------------|-----------------|-----------------|-----------------|-----------------|
| disease, severe                             | (1.789 - 2.198) | (0.521 - 0.798) | (1.170 - 1.332) | (0.558 - 0.765) | (1.020 - 1.104) | (0.859 - 0.950) | (1.020 - 1.140) |
|                                             | 0.000           | 0.000           | 0.000           | 0.000           | 0.003           | 0.000           | 0.008           |
| Renal failure                               | 0.896*          | 1.019           | 0.976           | 0.995           | 1.031*          | 1.020           | 1.036           |
|                                             | (0.792 - 1.014) | (0.883 - 1.176) | (0.916 - 1.039) | (0.897 - 1.105) | (0.996 - 1.066) | (0.978 - 1.063) | (0.984 - 1.090) |
|                                             | 0.082           | 0.799           | 0.445           | 0.931           | 0.081           | 0.356           | 0.176           |
| Hypothyroidism                              | 0.990           | 1.057*          | 1.045***        | 1.076***        | 1.053***        | 1.035***        | 1.014           |
|                                             | (0.924 - 1.060) | (0.993 - 1.124) | (1.011 - 1.080) | (1.025 - 1.130) | (1.037 - 1.070) | (1.015 - 1.055) | (0.987 - 1.041) |
|                                             | 0.768           | 0.080           | 0.010           | 0.003           | 0.000           | 0.001           | 0.308           |
| Other thyroid disorders                     | 0.892           | 0.909           | 1.014           | 0.873***        | 1.070***        | 1.014           | 1.114***        |
|                                             | (0.775 - 1.028) | (0.804 - 1.026) | (0.955 - 1.076) | (0.796 - 0.958) | (1.039 - 1.103) | (0.979 - 1.050) | (1.065 - 1.166) |
|                                             | 0.114           | 0.123           | 0.651           | 0.004           | 0.000           | 0.442           | 0.000           |
| Peptic ulcer with bleeding                  | 1.124*          | 1.262***        | 1.093**         | 1.080           | 1.023           | 1.020           | 1.137***        |
|                                             | (0.982 - 1.287) | (1.115 - 1.427) | (1.021 - 1.170) | (0.980 - 1.189) | (0.984 - 1.064) | (0.976 - 1.067) | (1.074 - 1.203) |
|                                             | 0.090           | 0.000           | 0.010           | 0.121           | 0.251           | 0.380           | 0.000           |
| Valvular disease                            | 1.119***        | 0.957           | 1.069***        | 0.962           | 1.058***        | 0.975           | 1.072***        |
|                                             | (1.032 - 1.213) | (0.858 - 1.068) | (1.020 - 1.121) | (0.886 - 1.044) | (1.031 - 1.085) | (0.944 - 1.006) | (1.030 - 1.114) |
|                                             | 0.007           | 0.438           | 0.006           | 0.348           | 0.000           | 0.116           | 0.001           |
| Weight loss                                 | 1.388***        | 1.085**         | 1.114***        | 1.028           | 1.051***        | 0.997           | 1.081***        |
|                                             | (1.295 - 1.488) | (1.010 - 1.166) | (1.075 - 1.154) | (0.975 - 1.084) | (1.030 - 1.072) | (0.974 - 1.021) | (1.049 - 1.115) |
|                                             | 0.000           | 0.026           | 0.000           | 0.309           | 0.000           | 0.826           | 0.000           |
| Past-year inpatient mental health care use  | 0.877***        | 1.325***        | 1.643***        | 2.296***        | 1.047***        | 1.135***        | 1.387***        |
|                                             | (0.802 - 0.959) | (1.265 - 1.388) | (1.598 - 1.690) | (2.218 - 2.378) | (1.029 - 1.065) | (1.115 - 1.156) | (1.355 - 1.420) |
|                                             | 0.004           | 0.000           | 0.000           | 0.000           | 0.000           | 0.000           | 0.000           |
| Past-year outpatient mental health care use | 0.856***        | 1.215***        | 1.197***        | 1.411***        | 1.435***        | 2.065***        | 1.268***        |
|                                             | (0.811 - 0.903) | (1.162 - 1.270) | (1.167 - 1.228) | (1.356 - 1.469) | (1.420 - 1.451) | (2.038 - 2.093) | (1.245 - 1.292) |
|                                             | 0.000           | 0.000           | 0.000           | 0.000           | 0.000           | 0.000           | 0.000           |
| Past-year suicide attempt                   | 1.042           | 4.737***        | 1.501***        | 1.704***        | 1.266***        | 1.392***        | 1.198***        |
|                                             | (0.942 - 1.152) | (4.551 - 4.931) | (1.455 - 1.548) | (1.642 - 1.767) | (1.243 - 1.289) | (1.366 - 1.418) | (1.168 - 1.229) |
|                                             | 0.426           | 0.000           | 0.000           | 0.000           | 0.000           | 0.000           | 0.000           |
| 2019                                        | 0.952           | 1.064**         | 0.885***        | 0.898***        | 0.989           | 0.929***        | 0.876***        |
|                                             | (0.886 - 1.024) | (1.011 - 1.120) | (0.860 - 0.912) | (0.863 - 0.935) | (0.974 - 1.003) | (0.914 - 0.944) | (0.857 - 0.896) |
|                                             | 0.186           | 0.018           | 0.000           | 0.000           | 0.123           | 0.000           | 0.000           |
| 2020                                        | 1.047           | 1.166***        | 0.787***        | 0.781***        | 0.957***        | 0.823***        | 0.750***        |
|                                             | (0.912 - 1.203) | (1.058 - 1.286) | (0.743 - 0.834) | (0.721 - 0.845) | (0.931 - 0.985) | (0.797 - 0.851) | (0.718 - 0.783) |
|                                             | 0.513           | 0.002           | 0.000           | 0.000           | 0.002           | 0.000           | 0.000           |
| 2021                                        | 1.053           | 1.215***        | 0.801***        | 0.763***        | 1.108***        | 0.926***        | 0.744***        |
|                                             | (0.866 - 1.280) | (1.058 - 1.395) | (0.738 - 0.870) | (0.681 - 0.854) | (1.065 - 1.153) | (0.884 - 0.969) | (0.700 - 0.792) |
|                                             | 0.606           | 0.006           | 0.000           | 0.000           | 0.000           | 0.001           | 0.000           |
| February                                    | 1.119**         | 1.052           | 1.002           | 0.974           | 1.027**         | 1.018           | 1.020           |

|              |                 |                 |                 |                 |                 |                 |                 |
|--------------|-----------------|-----------------|-----------------|-----------------|-----------------|-----------------|-----------------|
|              | (1.008 - 1.242) | (0.976 - 1.134) | (0.959 - 1.048) | (0.916 - 1.035) | (1.005 - 1.048) | (0.993 - 1.043) | (0.987 - 1.054) |
|              | 0.035           | 0.188           | 0.918           | 0.396           | 0.013           | 0.162           | 0.247           |
| March        | 1.112*          | 1.029           | 1.016           | 0.984           | 1.032***        | 1.074***        | 0.974           |
|              | (0.993 - 1.244) | (0.947 - 1.118) | (0.968 - 1.065) | (0.921 - 1.052) | (1.010 - 1.055) | (1.047 - 1.102) | (0.940 - 1.009) |
|              | 0.066           | 0.502           | 0.520           | 0.643           | 0.005           | 0.000           | 0.146           |
| April        | 1.100           | 1.068           | 1.028           | 0.993           | 1.018           | 1.050***        | 1.011           |
|              | (0.980 - 1.234) | (0.983 - 1.161) | (0.979 - 1.078) | (0.929 - 1.062) | (0.995 - 1.041) | (1.023 - 1.078) | (0.975 - 1.048) |
|              | 0.107           | 0.121           | 0.267           | 0.847           | 0.126           | 0.000           | 0.554           |
| May          | 1.136**         | 1.084*          | 1.057**         | 1.017           | 1.022*          | 1.092***        | 1.039**         |
|              | (1.013 - 1.274) | (0.998 - 1.177) | (1.008 - 1.109) | (0.952 - 1.086) | (1.000 - 1.045) | (1.065 - 1.121) | (1.003 - 1.076) |
|              | 0.029           | 0.055           | 0.021           | 0.618           | 0.050           | 0.000           | 0.035           |
| June         | 1.164***        | 1.045           | 0.962           | 0.924**         | 1.005           | 1.011           | 0.949***        |
|              | (1.038 - 1.306) | (0.962 - 1.135) | (0.916 - 1.010) | (0.865 - 0.988) | (0.983 - 1.028) | (0.984 - 1.037) | (0.915 - 0.984) |
|              | 0.009           | 0.295           | 0.115           | 0.021           | 0.649           | 0.434           | 0.005           |
| July         | 1.114*          | 1.056           | 0.931***        | 0.893***        | 1.011           | 0.979           | 0.934***        |
|              | (0.986 - 1.258) | (0.968 - 1.152) | (0.885 - 0.979) | (0.833 - 0.957) | (0.987 - 1.036) | (0.952 - 1.006) | (0.899 - 0.970) |
|              | 0.083           | 0.217           | 0.005           | 0.001           | 0.368           | 0.129           | 0.000           |
| August       | 1.051           | 1.061           | 0.924***        | 0.914**         | 1.001           | 0.969**         | 0.934***        |
|              | (0.929 - 1.188) | (0.972 - 1.157) | (0.878 - 0.972) | (0.853 - 0.979) | (0.977 - 1.025) | (0.943 - 0.997) | (0.900 - 0.970) |
|              | 0.429           | 0.183           | 0.002           | 0.011           | 0.930           | 0.028           | 0.000           |
| September    | 1.075           | 1.056           | 0.931***        | 0.905***        | 1.023*          | 0.981           | 0.916***        |
|              | (0.950 - 1.217) | (0.967 - 1.153) | (0.885 - 0.980) | (0.844 - 0.971) | (0.998 - 1.048) | (0.954 - 1.009) | (0.882 - 0.952) |
|              | 0.252           | 0.227           | 0.007           | 0.005           | 0.069           | 0.181           | 0.000           |
| October      | 1.146**         | 1.079*          | 0.908***        | 0.882***        | 1.012           | 0.975*          | 0.898***        |
|              | (1.015 - 1.294) | (0.989 - 1.178) | (0.863 - 0.956) | (0.822 - 0.946) | (0.988 - 1.036) | (0.948 - 1.003) | (0.864 - 0.933) |
|              | 0.028           | 0.086           | 0.000           | 0.000           | 0.349           | 0.078           | 0.000           |
| November     | 1.147**         | 1.023           | 0.912***        | 0.871***        | 1.003           | 0.960***        | 0.915***        |
|              | (1.013 - 1.298) | (0.935 - 1.119) | (0.865 - 0.960) | (0.811 - 0.936) | (0.979 - 1.028) | (0.933 - 0.987) | (0.880 - 0.952) |
|              | 0.031           | 0.619           | 0.001           | 0.000           | 0.798           | 0.004           | 0.000           |
| December     | 1.064           | 1.081*          | 0.909***        | 0.840***        | 0.978*          | 0.933***        | 0.917***        |
|              | (0.938 - 1.207) | (0.990 - 1.182) | (0.862 - 0.957) | (0.781 - 0.902) | (0.954 - 1.002) | (0.907 - 0.960) | (0.882 - 0.953) |
|              | 0.332           | 0.084           | 0.000           | 0.000           | 0.071           | 0.000           | 0.000           |
| Observations | 225,609         | 225,609         | 225,609         | 225,609         | 225,609         | 225,609         | 225,609         |
| AIC          | 215994          | 415385          | 1.204e+06       | 621335          | 4.929e+06       | 3.863e+06       | 2.146e+06       |
| BIC          | 218741          | 418132          | 1.207e+06       | 624071          | 4.932e+06       | 3.866e+06       | 2.148e+06       |

Notes: \*\*\* p<0.01, \*\* p<0.05, \* p<0.1; Coefficients are hazard ratios with 95% CI in parentheses, followed by p-value; Standard errors were clustered on patient level to account for multiple observations per individual; Excluded those with age at separation missing due to small cell size.



**eTable 10.** Hazard Ratios from Time-to-Event Analyses of Association Between Outcomes and Caring Letters Receipt, Presumed Completers

| VARIABLES                      | All-Cause Mortality          | Suicide Attempt             | Inpatient                                 | Inpatient Mental Health                   | Outpatient                                | Outpatient Mental Health Care             | Emergency Department Use                  |
|--------------------------------|------------------------------|-----------------------------|-------------------------------------------|-------------------------------------------|-------------------------------------------|-------------------------------------------|-------------------------------------------|
| <b>Caring Letters Received</b> | 1.018<br>(0.908 - 1.141)     | 0.996<br>(0.926 - 1.071)    | <b>1.107***</b><br><b>(1.059 - 1.157)</b> | <b>1.095***</b><br><b>(1.031 - 1.163)</b> | <b>1.111***</b><br><b>(1.089 - 1.133)</b> | <b>1.198***</b><br><b>(1.171 - 1.227)</b> | <b>1.094***</b><br><b>(1.059 - 1.130)</b> |
| Call during COVID Period       | 0.759<br>(0.759 - 1.028)     | 0.915<br>(0.806 - 0.983)    | <b>0.000</b><br><b>(0.854 - 0.962)</b>    | <b>0.003</b><br><b>(0.862 - 1.016)</b>    | <b>0.000</b><br><b>(0.779 - 0.823)</b>    | <b>0.000</b><br><b>(0.685 - 0.731)</b>    | <b>0.000</b><br><b>(0.978 - 1.069)</b>    |
| Call within prior year         | 0.883<br>(1.101 - 1.249)     | 0.890**<br>(1.042 - 1.122)  | 0.907***<br>(1.073 - 1.122)               | 0.936<br>(1.061 - 1.125)                  | 0.801***<br>(0.958 - 0.980)               | 0.707***<br>(0.993 - 1.019)               | 1.023<br>(1.086 - 1.125)                  |
| Age 40-54                      | 0.108<br>(1.537 - 1.964)     | 0.021<br>(0.809 - 0.882)    | 0.001<br>(1.050 - 1.114)                  | 0.112<br>(0.934 - 1.005)                  | 0.000<br>(1.009 - 1.036)                  | 0.000<br>(0.949 - 0.976)                  | 0.321<br>(0.967 - 1.009)                  |
| Age 55-64                      | 1.173***<br>(1.101 - 1.249)  | 1.081***<br>(1.042 - 1.122) | 1.097***<br>(1.073 - 1.122)               | 1.093***<br>(1.061 - 1.125)               | 0.969***<br>(0.958 - 0.980)               | 1.006<br>(0.993 - 1.019)                  | 1.106***<br>(1.086 - 1.125)               |
| Age 65-79                      | 0.000<br>(2.661 - 3.346)     | 0.000<br>(0.656 - 0.724)    | 0.000<br>(1.010 - 1.074)                  | 0.000<br>(0.854 - 0.925)                  | 0.000<br>(0.981 - 1.009)                  | 0.350<br>(0.821 - 0.847)                  | 0.000<br>(0.911 - 0.953)                  |
| Age over 80                    | 1.738***<br>(4.089 - 5.133)  | 0.845***<br>(0.430 - 0.487) | 1.081***<br>(0.930 - 0.995)               | 0.969*<br>(0.633 - 0.698)                 | 1.023***<br>(0.943 - 0.972)               | 0.962***<br>(0.618 - 0.640)               | 0.988<br>(0.803 - 0.845)                  |
| Female                         | 2.984***<br>(8.679 - 11.147) | 0.689***<br>(0.165 - 0.230) | 1.042**<br>(0.870 - 0.971)                | 0.889***<br>(0.202 - 0.271)               | 0.995<br>(0.882 - 0.922)                  | 0.834***<br>(0.292 - 0.314)               | 0.932***<br>(0.704 - 0.764)               |
| American Indian                | 0.000<br>(0.510 - 0.636)     | 0.000<br>(0.941 - 1.028)    | 0.002<br>(0.785 - 0.833)                  | 0.000<br>(0.791 - 0.856)                  | 0.000<br>(1.069 - 1.096)                  | 0.000<br>(1.062 - 1.091)                  | 0.000<br>(0.980 - 1.021)                  |
| Asian                          | 0.569***<br>(0.793 - 1.261)  | 0.983<br>(0.929 - 1.197)    | 0.808***<br>(0.910 - 1.080)               | 0.823***<br>(0.800 - 1.020)               | 1.083***<br>(0.903 - 0.981)               | 1.077***<br>(0.914 - 1.002)               | 1.000<br>(0.887 - 1.017)                  |
| Black                          | 1.000<br>(0.517 - 0.979)     | 1.055<br>(0.917 - 1.210)    | 0.991<br>(0.746 - 0.931)                  | 0.903<br>(0.853 - 1.121)                  | 0.941***<br>(0.944 - 1.024)               | 0.957*<br>(0.897 - 0.989)                 | 0.950<br>(0.860 - 0.995)                  |
| More than one race             | 0.712**<br>(0.606 - 0.693)   | 1.053<br>(0.787 - 0.859)    | 0.834***<br>(0.934 - 0.981)               | 0.978<br>(0.958 - 1.023)                  | 0.983<br>(0.987 - 1.009)                  | 0.942**<br>(0.998 - 1.024)                | 0.925**<br>(1.154 - 1.196)                |
| Native Hawaiian                | 0.037<br>(0.574 - 0.957)     | 0.465<br>(0.804 - 1.035)    | 0.001<br>(0.844 - 0.996)                  | 0.745<br>(0.842 - 1.046)                  | 0.409<br>(0.965 - 1.038)                  | 0.017<br>(0.975 - 1.059)                  | 0.036<br>(0.968 - 1.091)                  |
| Unknown race                   | 0.648***<br>(0.575 - 0.989)  | 0.822***<br>(0.877 - 1.181) | 0.957***<br>(0.825 - 1.013)               | 0.990<br>(0.780 - 1.037)                  | 0.998<br>(1.004 - 1.091)                  | 1.011*<br>(0.935 - 1.031)                 | 1.175***<br>(0.899 - 1.046)               |
| Non-Hispanic                   | 0.000<br>(0.022 - 0.041)     | 0.000<br>(0.015 - 0.018)    | 0.000<br>(0.040 - 0.087)                  | 0.531<br>(0.145 - 0.145)                  | 0.679<br>(0.033 - 0.033)                  | 0.091<br>(0.464 - 0.464)                  | 0.000<br>(0.424 - 0.424)                  |

|                                     |                 |                 |                 |                 |                 |                 |                 |
|-------------------------------------|-----------------|-----------------|-----------------|-----------------|-----------------|-----------------|-----------------|
|                                     | (1.020 - 1.274) | (0.901 - 1.014) | (1.001 - 1.083) | (1.000 - 1.112) | (0.965 - 0.999) | (0.948 - 0.986) | (0.912 - 0.965) |
|                                     | 0.021           | 0.133           | 0.042           | 0.051           | 0.038           | 0.001           | 0.000           |
| Unknown Ethnicity                   | 1.222**         | 1.023           | 0.967           | 1.050           | 0.855***        | 0.924***        | 0.852***        |
|                                     | (1.042 - 1.432) | (0.929 - 1.126) | (0.907 - 1.031) | (0.963 - 1.144) | (0.832 - 0.879) | (0.896 - 0.954) | (0.814 - 0.892) |
|                                     | 0.014           | 0.649           | 0.305           | 0.272           | 0.000           | 0.000           | 0.000           |
| Never Married                       | 1.240***        | 0.973           | 1.172***        | 1.159***        | 0.983***        | 0.981***        | 1.165***        |
|                                     | (1.151 - 1.335) | (0.932 - 1.016) | (1.141 - 1.204) | (1.118 - 1.202) | (0.971 - 0.994) | (0.967 - 0.994) | (1.143 - 1.188) |
|                                     | 0.000           | 0.218           | 0.000           | 0.000           | 0.004           | 0.005           | 0.000           |
| Divorced/Separated/Widowed          | 1.214***        | 1.027           | 1.192***        | 1.148***        | 0.996           | 0.987**         | 1.168***        |
|                                     | (1.150 - 1.281) | (0.989 - 1.068) | (1.165 - 1.219) | (1.111 - 1.186) | (0.986 - 1.006) | (0.975 - 0.998) | (1.148 - 1.188) |
|                                     | 0.000           | 0.168           | 0.000           | 0.000           | 0.424           | 0.024           | 0.000           |
| Marital Status Missing              | 1.359**         | 0.942           | 0.633***        | 0.647***        | 0.789***        | 0.906***        | 0.653***        |
|                                     | (1.041 - 1.773) | (0.805 - 1.101) | (0.550 - 0.729) | (0.539 - 0.776) | (0.753 - 0.825) | (0.861 - 0.954) | (0.596 - 0.715) |
|                                     | 0.024           | 0.452           | 0.000           | 0.000           | 0.000           | 0.000           | 0.000           |
| Army                                | 1.017           | 0.982           | 0.998           | 0.999           | 0.973***        | 0.959***        | 0.996           |
|                                     | (0.948 - 1.091) | (0.932 - 1.034) | (0.969 - 1.027) | (0.958 - 1.042) | (0.961 - 0.986) | (0.944 - 0.974) | (0.974 - 1.018) |
|                                     | 0.638           | 0.489           | 0.877           | 0.973           | 0.000           | 0.000           | 0.696           |
| Navy                                | 1.004           | 1.004           | 0.984           | 0.974           | 0.983**         | 0.977**         | 0.994           |
|                                     | (0.926 - 1.089) | (0.946 - 1.064) | (0.951 - 1.017) | (0.929 - 1.022) | (0.968 - 0.998) | (0.960 - 0.995) | (0.969 - 1.019) |
|                                     | 0.923           | 0.901           | 0.343           | 0.285           | 0.024           | 0.012           | 0.635           |
| Marine Corps                        | 0.982           | 1.032           | 0.998           | 0.988           | 0.962***        | 0.964***        | 0.981           |
|                                     | (0.894 - 1.077) | (0.969 - 1.100) | (0.961 - 1.035) | (0.938 - 1.041) | (0.946 - 0.979) | (0.945 - 0.983) | (0.954 - 1.009) |
|                                     | 0.695           | 0.323           | 0.900           | 0.652           | 0.000           | 0.000           | 0.174           |
| Others and missing                  | 1.094           | 0.954           | 0.970           | 0.985           | 0.953**         | 0.977           | 0.994           |
|                                     | (0.882 - 1.357) | (0.818 - 1.112) | (0.885 - 1.063) | (0.870 - 1.115) | (0.914 - 0.993) | (0.931 - 1.026) | (0.927 - 1.066) |
|                                     | 0.413           | 0.547           | 0.509           | 0.815           | 0.022           | 0.353           | 0.871           |
| Age at separation (Q2)              | 1.060*          | 0.944**         | 0.992           | 0.981           | 1.011*          | 1.006           | 0.972***        |
|                                     | (0.997 - 1.126) | (0.902 - 0.988) | (0.967 - 1.017) | (0.946 - 1.016) | (0.999 - 1.023) | (0.992 - 1.021) | (0.953 - 0.991) |
|                                     | 0.061           | 0.013           | 0.521           | 0.283           | 0.076           | 0.393           | 0.004           |
| Age at separation (Q3)              | 1.019           | 0.956**         | 0.997           | 0.990           | 1.018***        | 1.012           | 0.965***        |
|                                     | (0.955 - 1.088) | (0.913 - 1.000) | (0.972 - 1.023) | (0.955 - 1.026) | (1.006 - 1.031) | (0.997 - 1.026) | (0.947 - 0.985) |
|                                     | 0.567           | 0.049           | 0.828           | 0.566           | 0.003           | 0.108           | 0.000           |
| Age at separation (Q4)              | 0.974           | 0.915***        | 0.938***        | 0.944***        | 1.030***        | 1.037***        | 0.912***        |
|                                     | (0.907 - 1.047) | (0.872 - 0.960) | (0.912 - 0.964) | (0.908 - 0.982) | (1.017 - 1.043) | (1.022 - 1.053) | (0.893 - 0.932) |
|                                     | 0.477           | 0.000           | 0.000           | 0.004           | 0.000           | 0.000           | 0.000           |
| Dishonorable                        | 1.041           | 1.144           | 0.985           | 1.043           | 0.783***        | 0.881***        | 1.107**         |
|                                     | (0.733 - 1.481) | (0.942 - 1.389) | (0.865 - 1.121) | (0.892 - 1.219) | (0.734 - 0.836) | (0.823 - 0.944) | (1.006 - 1.218) |
|                                     | 0.821           | 0.176           | 0.817           | 0.598           | 0.000           | 0.000           | 0.037           |
| Other discharge                     | 1.115**         | 1.123***        | 1.090***        | 1.101***        | 0.972***        | 0.996           | 1.056***        |
|                                     | (1.000 - 1.242) | (1.064 - 1.184) | (1.053 - 1.129) | (1.055 - 1.150) | (0.955 - 0.989) | (0.978 - 1.016) | (1.028 - 1.085) |
|                                     | 0.049           | 0.000           | 0.000           | 0.000           | 0.001           | 0.716           | 0.000           |
| Unknown discharge                   | 0.935           | 1.033           | 0.936           | 0.938           | 0.969           | 0.978           | 0.945           |
|                                     | (0.723 - 1.210) | (0.878 - 1.216) | (0.842 - 1.041) | (0.809 - 1.088) | (0.927 - 1.013) | (0.929 - 1.031) | (0.876 - 1.018) |
|                                     | 0.611           | 0.696           | 0.222           | 0.399           | 0.160           | 0.413           | 0.137           |
| Acquired immune deficiency syndrome | 0.883           | 1.237***        | 1.125***        | 1.159***        | 1.120***        | 1.011           | 1.233***        |
|                                     | (0.695 - 1.123) | (1.083 - 1.414) | (1.042 - 1.216) | (1.048 - 1.281) | (1.075 - 1.167) | (0.963 - 1.061) | (1.161 - 1.309) |
|                                     | 0.312           | 0.002           | 0.003           | 0.004           | 0.000           | 0.656           | 0.000           |

|                                                  |                                      |                                      |                                      |                                      |                                      |                                      |                                      |
|--------------------------------------------------|--------------------------------------|--------------------------------------|--------------------------------------|--------------------------------------|--------------------------------------|--------------------------------------|--------------------------------------|
| Alcohol disorder                                 | 1.264***<br>(1.187 - 1.346)<br>0.000 | 1.206***<br>(1.161 - 1.253)<br>0.000 | 1.441***<br>(1.409 - 1.474)<br>0.000 | 1.318***<br>(1.277 - 1.360)<br>0.000 | 1.017***<br>(1.006 - 1.029)<br>0.002 | 1.045***<br>(1.032 - 1.058)<br>0.000 | 1.093***<br>(1.074 - 1.112)<br>0.000 |
| Anemias due to other<br>nutritional deficiencies | 1.198***<br>(1.124 - 1.276)<br>0.000 | 1.036<br>(0.980 - 1.096)<br>0.210    | 1.124***<br>(1.093 - 1.155)<br>0.000 | 1.028<br>(0.986 - 1.070)<br>0.193    | 1.037***<br>(1.022 - 1.052)<br>0.000 | 0.987<br>(0.970 - 1.004)<br>0.140    | 1.087***<br>(1.063 - 1.112)<br>0.000 |
| Autoimmune conditions                            | 0.904<br>(0.792 - 1.032)<br>0.134    | 1.015<br>(0.920 - 1.119)<br>0.771    | 1.085***<br>(1.031 - 1.141)<br>0.002 | 0.937<br>(0.865 - 1.015)<br>0.112    | 1.155***<br>(1.128 - 1.183)<br>0.000 | 1.029*<br>(0.999 - 1.060)<br>0.060   | 1.165***<br>(1.120 - 1.212)<br>0.000 |
| Chronic blood loss (iron<br>deficiency)          | 1.111<br>(0.947 - 1.303)<br>0.197    | 0.865<br>(0.720 - 1.040)<br>0.123    | 1.092**<br>(1.011 - 1.180)<br>0.025  | 0.970<br>(0.848 - 1.110)<br>0.658    | 0.997<br>(0.953 - 1.043)<br>0.893    | 0.984<br>(0.932 - 1.038)<br>0.549    | 1.018<br>(0.953 - 1.088)<br>0.590    |
| Leukemia                                         | 1.329**<br>(1.035 - 1.706)<br>0.026  | 0.624*<br>(0.388 - 1.004)<br>0.052   | 1.074<br>(0.920 - 1.254)<br>0.367    | 0.609***<br>(0.440 - 0.843)<br>0.003 | 1.036<br>(0.957 - 1.122)<br>0.377    | 1.069<br>(0.971 - 1.177)<br>0.174    | 1.025<br>(0.906 - 1.159)<br>0.695    |
| Lymphoma                                         | 1.327***<br>(1.080 - 1.629)<br>0.007 | 0.705**<br>(0.513 - 0.969)<br>0.031  | 1.130**<br>(1.008 - 1.267)<br>0.036  | 0.769**<br>(0.614 - 0.963)<br>0.022  | 1.098***<br>(1.037 - 1.163)<br>0.001 | 0.934*<br>(0.865 - 1.008)<br>0.080   | 1.147***<br>(1.048 - 1.256)<br>0.003 |
| Metastatic cancer                                | 2.927***<br>(2.549 - 3.362)<br>0.000 | 0.928<br>(0.705 - 1.222)<br>0.595    | 1.336***<br>(1.204 - 1.482)<br>0.000 | 0.850<br>(0.687 - 1.051)<br>0.132    | 1.158***<br>(1.096 - 1.223)<br>0.000 | 0.870***<br>(0.808 - 0.937)<br>0.000 | 1.234***<br>(1.136 - 1.340)<br>0.000 |
| Solid tumor without<br>metastasis, in situ       | 1.034<br>(0.930 - 1.149)<br>0.536    | 0.963<br>(0.837 - 1.108)<br>0.598    | 0.988<br>(0.931 - 1.048)<br>0.681    | 0.971<br>(0.875 - 1.077)<br>0.575    | 1.066***<br>(1.037 - 1.095)<br>0.000 | 0.991<br>(0.956 - 1.027)<br>0.618    | 0.999<br>(0.955 - 1.046)<br>0.982    |
| Solid tumor without<br>metastasis, malignant     | 1.301***<br>(1.203 - 1.407)<br>0.000 | 0.863***<br>(0.780 - 0.954)<br>0.004 | 1.155***<br>(1.109 - 1.204)<br>0.000 | 0.942*<br>(0.877 - 1.011)<br>0.098   | 1.110***<br>(1.088 - 1.132)<br>0.000 | 0.973**<br>(0.948 - 0.999)<br>0.039  | 1.168***<br>(1.130 - 1.206)<br>0.000 |
| Cerebrovascular disease -<br>Primary             | 1.136***<br>(1.071 - 1.204)<br>0.000 | 1.021<br>(0.975 - 1.070)<br>0.377    | 1.186***<br>(1.157 - 1.215)<br>0.000 | 1.063***<br>(1.025 - 1.101)<br>0.001 | 1.081***<br>(1.068 - 1.095)<br>0.000 | 0.990<br>(0.975 - 1.005)<br>0.176    | 1.161***<br>(1.138 - 1.183)<br>0.000 |
| Cerebrovascular disease -<br>Sequela             | 0.912<br>(0.789 - 1.055)<br>0.214    | 0.987<br>(0.861 - 1.133)<br>0.857    | 0.963<br>(0.900 - 1.030)<br>0.267    | 0.998<br>(0.898 - 1.110)<br>0.977    | 0.985<br>(0.950 - 1.022)<br>0.428    | 1.040*<br>(0.996 - 1.085)<br>0.073   | 1.010<br>(0.956 - 1.066)<br>0.726    |
| Coagulopathy                                     | 1.321***<br>(1.204 - 1.448)<br>0.000 | 0.959<br>(0.873 - 1.054)<br>0.387    | 1.226***<br>(1.176 - 1.279)<br>0.000 | 1.069**<br>(1.000 - 1.141)<br>0.048  | 1.040***<br>(1.014 - 1.066)<br>0.003 | 0.990<br>(0.960 - 1.020)<br>0.492    | 1.135***<br>(1.093 - 1.178)<br>0.000 |
| Dementia                                         | 1.266***<br>(1.158 - 1.384)<br>0.000 | 1.030<br>(0.930 - 1.142)<br>0.569    | 1.095***<br>(1.045 - 1.147)<br>0.000 | 1.171***<br>(1.090 - 1.257)<br>0.000 | 0.947***<br>(0.923 - 0.972)<br>0.000 | 1.043***<br>(1.012 - 1.075)<br>0.007 | 1.038*<br>(0.998 - 1.079)<br>0.066   |
| Depression                                       | 0.893***<br>(0.845 - 0.944)<br>0.000 | 1.217***<br>(1.170 - 1.266)<br>0.000 | 1.039***<br>(1.015 - 1.062)<br>0.001 | 1.000<br>(0.968 - 1.032)<br>0.982    | 1.100***<br>(1.089 - 1.111)<br>0.000 | 1.159***<br>(1.146 - 1.173)<br>0.000 | 1.066***<br>(1.048 - 1.083)<br>0.000 |
| Diabetes with chronic<br>complications           | 1.271***<br>(1.175 - 1.375)<br>0.000 | 1.044<br>(0.973 - 1.120)<br>0.231    | 1.135***<br>(1.097 - 1.175)<br>0.000 | 0.990<br>(0.938 - 1.045)<br>0.721    | 1.069***<br>(1.052 - 1.086)<br>0.000 | 0.980**<br>(0.961 - 1.000)<br>0.047  | 1.130***<br>(1.101 - 1.161)<br>0.000 |
| Diabetes without chronic<br>complications        | 1.008<br>(0.936 - 1.087)             | 0.971<br>(0.912 - 1.034)             | 1.006<br>(0.975 - 1.039)             | 0.979<br>(0.933 - 1.027)             | 1.046***<br>(1.031 - 1.061)          | 0.997<br>(0.980 - 1.015)             | 1.013<br>(0.989 - 1.038)             |

|                                                  |                 |                 |                 |                 |                 |                 |                 |
|--------------------------------------------------|-----------------|-----------------|-----------------|-----------------|-----------------|-----------------|-----------------|
|                                                  | 0.829           | 0.364           | 0.698           | 0.392           | 0.000           | 0.779           | 0.289           |
| Drug use disorder                                | 1.045           | 1.128***        | 1.356***        | 1.414***        | 1.054***        | 1.064***        | 1.214***        |
|                                                  | (0.974 - 1.121) | (1.083 - 1.175) | (1.324 - 1.389) | (1.369 - 1.462) | (1.041 - 1.067) | (1.050 - 1.079) | (1.192 - 1.237) |
|                                                  | 0.219           | 0.000           | 0.000           | 0.000           | 0.000           | 0.000           | 0.000           |
| Fluid and electrolyte disorders                  | 1.275***        | 1.117***        | 1.406***        | 1.160***        | 1.033***        | 1.012           | 1.350***        |
|                                                  | (1.194 - 1.363) | (1.062 - 1.174) | (1.370 - 1.443) | (1.118 - 1.205) | (1.018 - 1.048) | (0.995 - 1.029) | (1.321 - 1.380) |
|                                                  | 0.000           | 0.000           | 0.000           | 0.000           | 0.000           | 0.168           | 0.000           |
| Heart failure                                    | 1.544***        | 1.043           | 1.215***        | 0.948           | 1.034***        | 0.953***        | 1.097***        |
|                                                  | (1.434 - 1.663) | (0.956 - 1.139) | (1.171 - 1.261) | (0.888 - 1.012) | (1.013 - 1.054) | (0.929 - 0.978) | (1.064 - 1.132) |
|                                                  | 0.000           | 0.343           | 0.000           | 0.109           | 0.001           | 0.000           | 0.000           |
| Homeless                                         | 1.122***        | 1.015           | 1.222***        | 1.255***        | 0.976***        | 1.059***        | 1.173***        |
|                                                  | (1.045 - 1.205) | (0.974 - 1.057) | (1.194 - 1.251) | (1.217 - 1.294) | (0.963 - 0.988) | (1.045 - 1.074) | (1.151 - 1.195) |
|                                                  | 0.002           | 0.478           | 0.000           | 0.000           | 0.000           | 0.000           | 0.000           |
| Hypertension, complicated                        | 1.002           | 1.065*          | 1.134***        | 1.042           | 1.022**         | 0.996           | 1.074***        |
|                                                  | (0.928 - 1.082) | (0.989 - 1.148) | (1.096 - 1.174) | (0.987 - 1.101) | (1.004 - 1.041) | (0.974 - 1.019) | (1.044 - 1.105) |
|                                                  | 0.957           | 0.097           | 0.000           | 0.139           | 0.015           | 0.752           | 0.000           |
| Hypertension, uncomplicated                      | 1.005           | 0.957**         | 1.083***        | 0.972*          | 1.107***        | 0.983***        | 1.074***        |
|                                                  | (0.948 - 1.066) | (0.920 - 0.996) | (1.059 - 1.108) | (0.942 - 1.002) | (1.096 - 1.118) | (0.971 - 0.995) | (1.055 - 1.092) |
|                                                  | 0.864           | 0.031           | 0.000           | 0.071           | 0.000           | 0.006           | 0.000           |
| Liver disease, mild                              | 1.259***        | 1.022           | 1.208***        | 1.101***        | 1.055***        | 1.025***        | 1.166***        |
|                                                  | (1.174 - 1.351) | (0.968 - 1.079) | (1.175 - 1.241) | (1.060 - 1.145) | (1.039 - 1.071) | (1.007 - 1.043) | (1.140 - 1.193) |
|                                                  | 0.000           | 0.433           | 0.000           | 0.000           | 0.000           | 0.006           | 0.000           |
| Liver disease and failure,<br>moderate to severe | 1.672***        | 0.899           | 1.030           | 0.922           | 0.988           | 0.921***        | 1.026           |
|                                                  | (1.447 - 1.932) | (0.760 - 1.063) | (0.958 - 1.107) | (0.820 - 1.037) | (0.943 - 1.036) | (0.872 - 0.972) | (0.962 - 1.095) |
|                                                  | 0.000           | 0.214           | 0.432           | 0.175           | 0.619           | 0.003           | 0.432           |
| Liver disease                                    | 1.196           | 0.908           | 1.042           | 0.926           | 0.902*          | 0.921           | 0.959           |
|                                                  | (0.853 - 1.677) | (0.638 - 1.292) | (0.877 - 1.239) | (0.703 - 1.219) | (0.804 - 1.012) | (0.817 - 1.038) | (0.816 - 1.126) |
|                                                  | 0.299           | 0.590           | 0.639           | 0.583           | 0.078           | 0.178           | 0.606           |
| Chronic pulmonary disease                        | 1.253***        | 1.050**         | 1.075***        | 1.016           | 1.080***        | 1.023***        | 1.133***        |
|                                                  | (1.187 - 1.322) | (1.006 - 1.097) | (1.050 - 1.100) | (0.983 - 1.051) | (1.068 - 1.092) | (1.010 - 1.037) | (1.112 - 1.153) |
|                                                  | 0.000           | 0.027           | 0.000           | 0.345           | 0.000           | 0.001           | 0.000           |
| Neurological disorders affecting<br>movement     | 1.010           | 1.071           | 1.093***        | 1.172***        | 1.077***        | 1.098***        | 1.093***        |
|                                                  | (0.907 - 1.124) | (0.985 - 1.164) | (1.044 - 1.144) | (1.100 - 1.249) | (1.053 - 1.102) | (1.069 - 1.128) | (1.053 - 1.134) |
|                                                  | 0.859           | 0.109           | 0.000           | 0.000           | 0.000           | 0.000           | 0.000           |
| Other neurological disorders                     | 1.054           | 1.026           | 1.029*          | 1.010           | 1.044***        | 1.038***        | 1.078***        |
|                                                  | (0.975 - 1.140) | (0.961 - 1.094) | (0.995 - 1.065) | (0.961 - 1.061) | (1.025 - 1.063) | (1.016 - 1.060) | (1.048 - 1.108) |
|                                                  | 0.185           | 0.443           | 0.095           | 0.704           | 0.000           | 0.001           | 0.000           |
| Seizures and epilepsy                            | 1.234***        | 1.090**         | 1.069***        | 1.014           | 1.042***        | 0.979*          | 1.047***        |
|                                                  | (1.117 - 1.363) | (1.019 - 1.167) | (1.028 - 1.111) | (0.962 - 1.068) | (1.019 - 1.064) | (0.956 - 1.003) | (1.013 - 1.082) |
|                                                  | 0.000           | 0.012           | 0.001           | 0.601           | 0.000           | 0.088           | 0.006           |
| Obesity                                          | 0.832***        | 0.979           | 0.998           | 0.987           | 1.112***        | 1.067***        | 1.088***        |
|                                                  | (0.782 - 0.885) | (0.941 - 1.019) | (0.975 - 1.020) | (0.957 - 1.019) | (1.100 - 1.123) | (1.054 - 1.080) | (1.069 - 1.106) |
|                                                  | 0.000           | 0.300           | 0.832           | 0.426           | 0.000           | 0.000           | 0.000           |
| Paralysis                                        | 1.210**         | 1.052           | 1.133***        | 0.848***        | 1.018           | 0.863***        | 1.037           |
|                                                  | (1.035 - 1.416) | (0.916 - 1.209) | (1.056 - 1.216) | (0.757 - 0.949) | (0.978 - 1.060) | (0.824 - 0.904) | (0.979 - 1.099) |
|                                                  | 0.017           | 0.470           | 0.001           | 0.004           | 0.383           | 0.000           | 0.213           |
| Peripheral vascular disease                      | 1.144***        | 0.953           | 1.122***        | 0.904***        | 1.106***        | 0.996           | 1.127***        |

|                                              |                 |                 |                 |                 |                 |                 |                 |
|----------------------------------------------|-----------------|-----------------|-----------------|-----------------|-----------------|-----------------|-----------------|
|                                              | (1.072 - 1.221) | (0.886 - 1.026) | (1.086 - 1.158) | (0.856 - 0.956) | (1.088 - 1.124) | (0.976 - 1.017) | (1.098 - 1.157) |
|                                              | 0.000           | 0.203           | 0.000           | 0.000           | 0.000           | 0.707           | 0.000           |
| Psychoses                                    | 1.001           | 1.189***        | 1.218***        | 1.544***        | 1.070***        | 1.186***        | 1.139***        |
|                                              | (0.942 - 1.063) | (1.147 - 1.232) | (1.192 - 1.244) | (1.500 - 1.590) | (1.059 - 1.081) | (1.173 - 1.200) | (1.121 - 1.158) |
|                                              | 0.982           | 0.000           | 0.000           | 0.000           | 0.000           | 0.000           | 0.000           |
| Pulmonary circulation disease                | 1.205***        | 1.082           | 1.137***        | 1.002           | 1.066***        | 1.021           | 1.127***        |
|                                              | (1.080 - 1.345) | (0.955 - 1.226) | (1.074 - 1.203) | (0.910 - 1.103) | (1.032 - 1.101) | (0.983 - 1.061) | (1.074 - 1.183) |
|                                              | 0.001           | 0.217           | 0.000           | 0.975           | 0.000           | 0.287           | 0.000           |
| Renal (kidney) failure and disease, moderate | 1.053           | 0.933           | 1.030           | 0.992           | 1.030***        | 1.002           | 1.009           |
|                                              | (0.971 - 1.142) | (0.850 - 1.024) | (0.990 - 1.072) | (0.928 - 1.061) | (1.010 - 1.051) | (0.976 - 1.028) | (0.977 - 1.043) |
|                                              | 0.211           | 0.142           | 0.148           | 0.818           | 0.003           | 0.896           | 0.578           |
| Renal (kidney) failure and disease, severe   | 1.978***        | 0.669***        | 1.246***        | 0.641***        | 1.053**         | 0.897***        | 1.069**         |
|                                              | (1.764 - 2.218) | (0.539 - 0.831) | (1.166 - 1.330) | (0.545 - 0.753) | (1.012 - 1.097) | (0.852 - 0.944) | (1.010 - 1.131) |
|                                              | 0.000           | 0.000           | 0.000           | 0.000           | 0.012           | 0.000           | 0.022           |
| Renal failure                                | 0.826***        | 1.048           | 0.984           | 1.016           | 1.033*          | 1.017           | 1.037           |
|                                              | (0.717 - 0.951) | (0.904 - 1.213) | (0.923 - 1.050) | (0.913 - 1.131) | (0.997 - 1.070) | (0.974 - 1.061) | (0.985 - 1.093) |
|                                              | 0.008           | 0.535           | 0.626           | 0.766           | 0.071           | 0.439           | 0.166           |
| Hypothyroidism                               | 1.003           | 1.058*          | 1.044**         | 1.068***        | 1.053***        | 1.034***        | 1.015           |
|                                              | (0.930 - 1.082) | (0.993 - 1.127) | (1.009 - 1.080) | (1.016 - 1.122) | (1.036 - 1.070) | (1.014 - 1.055) | (0.988 - 1.043) |
|                                              | 0.931           | 0.081           | 0.013           | 0.010           | 0.000           | 0.001           | 0.271           |
| Other thyroid disorders                      | 0.833**         | 0.919           | 1.018           | 0.898**         | 1.074***        | 1.016           | 1.126***        |
|                                              | (0.710 - 0.979) | (0.811 - 1.041) | (0.958 - 1.082) | (0.817 - 0.987) | (1.042 - 1.107) | (0.981 - 1.053) | (1.075 - 1.179) |
|                                              | 0.026           | 0.184           | 0.561           | 0.026           | 0.000           | 0.378           | 0.000           |
| Peptic ulcer with bleeding                   | 1.054           | 1.298***        | 1.093**         | 1.092*          | 1.020           | 1.017           | 1.130***        |
|                                              | (0.904 - 1.228) | (1.143 - 1.473) | (1.019 - 1.172) | (0.988 - 1.207) | (0.980 - 1.062) | (0.972 - 1.064) | (1.066 - 1.198) |
|                                              | 0.501           | 0.000           | 0.012           | 0.085           | 0.325           | 0.471           | 0.000           |
| Valvular disease                             | 1.118**         | 0.961           | 1.073***        | 0.961           | 1.052***        | 0.969*          | 1.066***        |
|                                              | (1.022 - 1.224) | (0.858 - 1.076) | (1.023 - 1.125) | (0.883 - 1.045) | (1.024 - 1.080) | (0.938 - 1.001) | (1.025 - 1.110) |
|                                              | 0.015           | 0.490           | 0.004           | 0.350           | 0.000           | 0.056           | 0.002           |
| Weight loss                                  | 1.385***        | 1.076*          | 1.119***        | 1.034           | 1.048***        | 0.996           | 1.081***        |
|                                              | (1.281 - 1.497) | (0.998 - 1.160) | (1.079 - 1.161) | (0.978 - 1.092) | (1.026 - 1.069) | (0.972 - 1.021) | (1.048 - 1.116) |
|                                              | 0.000           | 0.055           | 0.000           | 0.236           | 0.000           | 0.752           | 0.000           |
| Past-year inpatient mental health use        | 0.878***        | 1.319***        | 1.642***        | 2.306***        | 1.051***        | 1.136***        | 1.383***        |
|                                              | (0.796 - 0.969) | (1.257 - 1.384) | (1.596 - 1.690) | (2.224 - 2.390) | (1.033 - 1.070) | (1.115 - 1.157) | (1.350 - 1.417) |
|                                              | 0.010           | 0.000           | 0.000           | 0.000           | 0.000           | 0.000           | 0.000           |
| Past-year outpatient mental health use       | 0.849***        | 1.221***        | 1.198***        | 1.415***        | 1.436***        | 2.069***        | 1.268***        |
|                                              | (0.799 - 0.901) | (1.166 - 1.278) | (1.167 - 1.229) | (1.358 - 1.475) | (1.420 - 1.451) | (2.041 - 2.098) | (1.245 - 1.292) |
|                                              | 0.000           | 0.000           | 0.000           | 0.000           | 0.000           | 0.000           | 0.000           |
| Past-year suicide attempt                    | 1.021           | 4.786***        | 1.502***        | 1.700***        | 1.265***        | 1.393***        | 1.199***        |
|                                              | (0.912 - 1.143) | (4.593 - 4.987) | (1.455 - 1.551) | (1.637 - 1.766) | (1.242 - 1.288) | (1.366 - 1.420) | (1.168 - 1.231) |
|                                              | 0.722           | 0.000           | 0.000           | 0.000           | 0.000           | 0.000           | 0.000           |
| 2019                                         | 0.970           | 1.064**         | 0.884***        | 0.896***        | 0.988           | 0.929***        | 0.875***        |
|                                              | (0.895 - 1.050) | (1.010 - 1.120) | (0.858 - 0.910) | (0.861 - 0.933) | (0.974 - 1.003) | (0.914 - 0.944) | (0.855 - 0.895) |
|                                              | 0.448           | 0.020           | 0.000           | 0.000           | 0.121           | 0.000           | 0.000           |
| 2020                                         | 1.136           | 1.171***        | 0.780***        | 0.776***        | 0.955***        | 0.822***        | 0.748***        |
|                                              | (0.974 - 1.325) | (1.061 - 1.293) | (0.736 - 0.827) | (0.716 - 0.841) | (0.928 - 0.982) | (0.796 - 0.850) | (0.715 - 0.781) |
|                                              | 0.105           | 0.002           | 0.000           | 0.000           | 0.001           | 0.000           | 0.000           |

|              |                             |                            |                             |                             |                             |                             |                             |
|--------------|-----------------------------|----------------------------|-----------------------------|-----------------------------|-----------------------------|-----------------------------|-----------------------------|
| 2021         | 1.184<br>(0.952 - 1.473)    | 1.197**<br>(1.039 - 1.379) | 0.772***<br>(0.710 - 0.840) | 0.735***<br>(0.655 - 0.825) | 1.112***<br>(1.069 - 1.157) | 0.923***<br>(0.881 - 0.966) | 0.734***<br>(0.689 - 0.781) |
|              | 0.129                       | 0.013                      | 0.000                       | 0.000                       | 0.000                       | 0.001                       | 0.000                       |
| February     | 1.134**<br>(1.009 - 1.276)  | 1.048<br>(0.969 - 1.132)   | 0.991<br>(0.947 - 1.038)    | 0.965<br>(0.906 - 1.029)    | 1.024**<br>(1.002 - 1.046)  | 1.015<br>(0.990 - 1.041)    | 1.012<br>(0.979 - 1.047)    |
|              | 0.035                       | 0.241                      | 0.714                       | 0.274                       | 0.031                       | 0.235                       | 0.477                       |
| March        | 1.157**<br>(1.020 - 1.313)  | 1.025<br>(0.940 - 1.118)   | 1.005<br>(0.956 - 1.055)    | 0.977<br>(0.911 - 1.047)    | 1.030**<br>(1.007 - 1.053)  | 1.078***<br>(1.050 - 1.107) | 0.972<br>(0.937 - 1.008)    |
|              | 0.023                       | 0.575                      | 0.858                       | 0.502                       | 0.011                       | 0.000                       | 0.126                       |
| April        | 1.180**<br>(1.037 - 1.342)  | 1.080*<br>(0.990 - 1.177)  | 1.019<br>(0.970 - 1.071)    | 0.988<br>(0.922 - 1.059)    | 1.014<br>(0.991 - 1.037)    | 1.050***<br>(1.023 - 1.079) | 1.007<br>(0.970 - 1.044)    |
|              | 0.012                       | 0.083                      | 0.454                       | 0.741                       | 0.240                       | 0.000                       | 0.728                       |
| May          | 1.142**<br>(1.004 - 1.299)  | 1.084*<br>(0.995 - 1.182)  | 1.051**<br>(1.001 - 1.104)  | 1.008<br>(0.941 - 1.080)    | 1.017<br>(0.995 - 1.040)    | 1.090***<br>(1.062 - 1.119) | 1.036*<br>(0.999 - 1.074)   |
|              | 0.044                       | 0.064                      | 0.048                       | 0.812                       | 0.134                       | 0.000                       | 0.059                       |
| June         | 1.239***<br>(1.089 - 1.409) | 1.039<br>(0.954 - 1.132)   | 0.951**<br>(0.904 - 0.999)  | 0.908***<br>(0.847 - 0.973) | 1.003<br>(0.981 - 1.027)    | 1.011<br>(0.984 - 1.038)    | 0.944***<br>(0.909 - 0.979) |
|              | 0.001                       | 0.383                      | 0.045                       | 0.006                       | 0.770                       | 0.430                       | 0.002                       |
| July         | 1.185**<br>(1.034 - 1.357)  | 1.051<br>(0.962 - 1.149)   | 0.926***<br>(0.879 - 0.975) | 0.886***<br>(0.825 - 0.951) | 1.006<br>(0.981 - 1.031)    | 0.977<br>(0.949 - 1.005)    | 0.931***<br>(0.896 - 0.968) |
|              | 0.015                       | 0.272                      | 0.003                       | 0.001                       | 0.646                       | 0.101                       | 0.000                       |
| August       | 1.094<br>(0.954 - 1.255)    | 1.061<br>(0.971 - 1.160)   | 0.916***<br>(0.870 - 0.965) | 0.915**<br>(0.852 - 0.982)  | 0.996<br>(0.972 - 1.021)    | 0.967**<br>(0.940 - 0.995)  | 0.934***<br>(0.899 - 0.971) |
|              | 0.200                       | 0.190                      | 0.001                       | 0.013                       | 0.763                       | 0.020                       | 0.001                       |
| September    | 1.156**<br>(1.008 - 1.327)  | 1.065<br>(0.973 - 1.165)   | 0.923***<br>(0.876 - 0.972) | 0.894***<br>(0.832 - 0.961) | 1.021*<br>(0.996 - 1.047)   | 0.979<br>(0.951 - 1.007)    | 0.914***<br>(0.879 - 0.951) |
|              | 0.039                       | 0.173                      | 0.003                       | 0.002                       | 0.099                       | 0.137                       | 0.000                       |
| October      | 1.236***<br>(1.079 - 1.415) | 1.071<br>(0.979 - 1.172)   | 0.895***<br>(0.850 - 0.943) | 0.866***<br>(0.806 - 0.930) | 1.009<br>(0.984 - 1.034)    | 0.972*<br>(0.945 - 1.000)   | 0.892***<br>(0.858 - 0.927) |
|              | 0.002                       | 0.133                      | 0.000                       | 0.000                       | 0.492                       | 0.052                       | 0.000                       |
| November     | 1.241***<br>(1.081 - 1.425) | 1.015<br>(0.926 - 1.113)   | 0.899**<br>(0.853 - 0.949)  | 0.862***<br>(0.801 - 0.928) | 1.000<br>(0.975 - 1.025)    | 0.958***<br>(0.931 - 0.986) | 0.908***<br>(0.873 - 0.945) |
|              | 0.002                       | 0.747                      | 0.000                       | 0.000                       | 0.970                       | 0.004                       | 0.000                       |
| December     | 1.151**<br>(1.000 - 1.324)  | 1.081*<br>(0.987 - 1.184)  | 0.894***<br>(0.847 - 0.943) | 0.822***<br>(0.764 - 0.885) | 0.976*<br>(0.952 - 1.001)   | 0.930***<br>(0.904 - 0.957) | 0.909***<br>(0.874 - 0.946) |
|              | 0.050                       | 0.094                      | 0.000                       | 0.000                       | 0.056                       | 0.000                       | 0.000                       |
| Observations | 217,747                     | 217,747                    | 217,747                     | 217,747                     | 217,747                     | 217,747                     | 217,747                     |
| AIC          | 174177                      | 390983                     | 1.144e+06                   | 586494                      | 4.757e+06                   | 3.731e+06                   | 2.060e+06                   |
| BIC          | 176914                      | 393721                     | 1.147e+06                   | 589232                      | 4.760e+06                   | 3.734e+06                   | 2.063e+06                   |

Notes: \*\*\* p<0.01, \*\* p<0.05, \* p<0.1; Coefficients are hazard ratios with 95% CI in parentheses, followed by p-value; Standard errors were clustered on patient level to account for multiple observations per individual; Excluded those with age at separation missing due to small cell size.

**eTable 11.** Hazard Ratios from Time-to-Event Analyses of Association between Outcomes and Caring Letters Receipt, Repeat Callers

| VARIABLES               | All-Cause Mortality | Suicide Attempt | Inpatient | Inpatient Mental Health | Outpatient | Outpatient Mental Health Care | Emergency Department Use |
|-------------------------|---------------------|-----------------|-----------|-------------------------|------------|-------------------------------|--------------------------|
| Caring Letters Received | 0.898               | 1.144*          | 1.133***  | 1.149**                 | 1.059***   | 1.132***                      | 1.103***                 |

|                          |                 |                 |                        |                        |                        |                        |                        |
|--------------------------|-----------------|-----------------|------------------------|------------------------|------------------------|------------------------|------------------------|
|                          | (0.725 - 1.112) | (0.997 - 1.313) | <b>(1.042 - 1.233)</b> | <b>(1.030 - 1.281)</b> | <b>(1.015 - 1.106)</b> | <b>(1.078 - 1.188)</b> | <b>(1.032 - 1.179)</b> |
|                          | 0.322           | 0.056           | <b>0.004</b>           | <b>0.013</b>           | <b>0.009</b>           | <b>0.000</b>           | <b>0.004</b>           |
| Call during COVID Period | 0.959           | 0.820**         | 0.885**                | 0.900                  | 0.814***               | 0.712***               | 1.058                  |
|                          | (0.717 - 1.283) | (0.683 - 0.983) | (0.792 - 0.989)        | (0.778 - 1.041)        | (0.767 - 0.864)        | (0.666 - 0.761)        | (0.968 - 1.157)        |
|                          | 0.777           | 0.032           | 0.031                  | 0.157                  | 0.000                  | 0.000                  | 0.215                  |
| Age 40-54                | 1.776***        | 0.835***        | 1.047*                 | 0.957                  | 1.015                  | 0.973*                 | 0.987                  |
|                          | (1.444 - 2.183) | (0.771 - 0.903) | (0.993 - 1.104)        | (0.896 - 1.021)        | (0.987 - 1.043)        | (0.945 - 1.002)        | (0.947 - 1.028)        |
|                          | 0.000           | 0.000           | 0.091                  | 0.181                  | 0.294                  | 0.068                  | 0.523                  |
| Age 55-64                | 2.451***        | 0.713***        | 1.048*                 | 0.922**                | 1.000                  | 0.891***               | 0.957**                |
|                          | (2.013 - 2.986) | (0.653 - 0.777) | (0.991 - 1.107)        | (0.861 - 0.988)        | (0.972 - 1.029)        | (0.864 - 0.920)        | (0.916 - 0.999)        |
|                          | 0.000           | 0.000           | 0.099                  | 0.022                  | 0.999                  | 0.000                  | 0.044                  |
| Age 65-79                | 3.555***        | 0.519***        | 0.988                  | 0.773***               | 0.962**                | 0.748***               | 0.902***               |
|                          | (2.914 - 4.337) | (0.463 - 0.581) | (0.928 - 1.053)        | (0.710 - 0.842)        | (0.932 - 0.994)        | (0.721 - 0.776)        | (0.858 - 0.948)        |
|                          | 0.000           | 0.000           | 0.719                  | 0.000                  | 0.021                  | 0.000                  | 0.000                  |
| Age over 80              | 7.513***        | 0.215***        | 0.976                  | 0.341***               | 1.021                  | 0.469***               | 0.827***               |
|                          | (5.886 - 9.589) | (0.145 - 0.317) | (0.861 - 1.106)        | (0.258 - 0.451)        | (0.963 - 1.083)        | (0.431 - 0.509)        | (0.750 - 0.913)        |
|                          | 0.000           | 0.000           | 0.704                  | 0.000                  | 0.484                  | 0.000                  | 0.000                  |
| Female                   | 0.559***        | 0.999           | 0.834***               | 0.863***               | 1.085***               | 1.089***               | 1.013                  |
|                          | (0.461 - 0.678) | (0.922 - 1.083) | (0.791 - 0.880)        | (0.806 - 0.924)        | (1.058 - 1.114)        | (1.059 - 1.120)        | (0.974 - 1.053)        |
|                          | 0.000           | 0.985           | 0.000                  | 0.000                  | 0.000                  | 0.000                  | 0.522                  |
| American Indian          | 0.903           | 1.137           | 1.068                  | 0.997                  | 0.950                  | 0.928*                 | 0.921                  |
|                          | (0.581 - 1.404) | (0.916 - 1.411) | (0.922 - 1.237)        | (0.815 - 1.219)        | (0.874 - 1.032)        | (0.849 - 1.014)        | (0.811 - 1.045)        |
|                          | 0.651           | 0.245           | 0.380                  | 0.977                  | 0.222                  | 0.100                  | 0.200                  |
| Asian                    | 0.441*          | 0.907           | 0.850                  | 1.002                  | 0.985                  | 0.988                  | 0.811***               |
|                          | (0.180 - 1.079) | (0.687 - 1.200) | (0.694 - 1.039)        | (0.792 - 1.267)        | (0.901 - 1.078)        | (0.890 - 1.098)        | (0.697 - 0.944)        |
|                          | 0.073           | 0.495           | 0.113                  | 0.988                  | 0.743                  | 0.826                  | 0.007                  |
| Black                    | 0.548***        | 0.856***        | 0.967                  | 1.016                  | 1.011                  | 1.020                  | 1.122***               |
|                          | (0.480 - 0.626) | (0.792 - 0.925) | (0.926 - 1.011)        | (0.960 - 1.074)        | (0.988 - 1.036)        | (0.994 - 1.047)        | (1.084 - 1.162)        |
|                          | 0.000           | 0.000           | 0.138                  | 0.592                  | 0.342                  | 0.141                  | 0.000                  |
| More than one race       | 0.745           | 0.832           | 0.833**                | 0.823*                 | 1.009                  | 1.051                  | 1.035                  |
|                          | (0.469 - 1.183) | (0.652 - 1.063) | (0.710 - 0.977)        | (0.672 - 1.008)        | (0.934 - 1.089)        | (0.963 - 1.148)        | (0.920 - 1.164)        |
|                          | 0.213           | 0.141           | 0.025                  | 0.059                  | 0.829                  | 0.265                  | 0.566                  |
| Native Hawaiian          | 0.817           | 1.044           | 1.012                  | 1.009                  | 1.009                  | 0.975                  | 0.949                  |
|                          | (0.471 - 1.418) | (0.776 - 1.403) | (0.823 - 1.244)        | (0.781 - 1.303)        | (0.918 - 1.109)        | (0.876 - 1.085)        | (0.813 - 1.108)        |
|                          | 0.473           | 0.778           | 0.913                  | 0.944                  | 0.858                  | 0.640                  | 0.510                  |
| Unknown race             | 0.770**         | 0.942           | 0.921*                 | 0.970                  | 0.929***               | 0.932***               | 0.976                  |
|                          | (0.623 - 0.951) | (0.830 - 1.070) | (0.848 - 1.000)        | (0.873 - 1.077)        | (0.892 - 0.969)        | (0.891 - 0.975)        | (0.916 - 1.039)        |
|                          | 0.015           | 0.361           | 0.051                  | 0.568                  | 0.001                  | 0.002                  | 0.443                  |
| Non-Hispanic             | 1.137           | 0.926           | 0.995                  | 0.968                  | 1.003                  | 0.993                  | 0.931**                |
|                          | (0.911 - 1.418) | (0.832 - 1.032) | (0.925 - 1.071)        | (0.882 - 1.061)        | (0.966 - 1.041)        | (0.953 - 1.035)        | (0.880 - 0.985)        |
|                          | 0.257           | 0.164           | 0.899                  | 0.485                  | 0.889                  | 0.731                  | 0.013                  |
| Unknown Ethnicity        | 1.058           | 0.990           | 0.955                  | 0.981                  | 0.863***               | 0.943*                 | 0.839***               |
|                          | (0.757 - 1.478) | (0.825 - 1.188) | (0.845 - 1.079)        | (0.842 - 1.144)        | (0.812 - 0.917)        | (0.882 - 1.007)        | (0.764 - 0.922)        |
|                          | 0.741           | 0.915           | 0.457                  | 0.811                  | 0.000                  | 0.081                  | 0.000                  |
| Never Married            | 1.116           | 0.945           | 1.149***               | 1.164***               | 0.991                  | 0.994                  | 1.106***               |
|                          | (0.968 - 1.287) | (0.873 - 1.023) | (1.094 - 1.207)        | (1.092 - 1.241)        | (0.966 - 1.017)        | (0.966 - 1.022)        | (1.065 - 1.149)        |
|                          | 0.131           | 0.162           | 0.000                  | 0.000                  | 0.494                  | 0.673                  | 0.000                  |

|                                               |                             |                             |                             |                             |                             |                             |                             |
|-----------------------------------------------|-----------------------------|-----------------------------|-----------------------------|-----------------------------|-----------------------------|-----------------------------|-----------------------------|
| Divorced/Separated/Widowed                    | 1.253***<br>(1.119 - 1.402) | 1.010<br>(0.939 - 1.085)    | 1.143***<br>(1.094 - 1.195) | 1.143***<br>(1.078 - 1.212) | 0.997<br>(0.975 - 1.019)    | 0.993<br>(0.969 - 1.019)    | 1.096***<br>(1.059 - 1.134) |
|                                               | 0.000                       | 0.794                       | 0.000                       | 0.000                       | 0.761                       | 0.611                       | 0.000                       |
| Marital Status Missing                        | 1.467<br>(0.892 - 2.413)    | 0.837<br>(0.607 - 1.155)    | 0.651***<br>(0.498 - 0.850) | 0.604***<br>(0.421 - 0.865) | 0.732***<br>(0.659 - 0.813) | 0.859***<br>(0.767 - 0.963) | 0.608***<br>(0.499 - 0.740) |
|                                               | 0.131                       | 0.279                       | 0.002                       | 0.006                       | 0.000                       | 0.009                       | 0.000                       |
| Army                                          | 0.951<br>(0.828 - 1.091)    | 0.934<br>(0.851 - 1.026)    | 1.033<br>(0.978 - 1.092)    | 1.002<br>(0.932 - 1.077)    | 0.980<br>(0.953 - 1.009)    | 0.959**<br>(0.929 - 0.990)  | 1.044*<br>(1.000 - 1.091)   |
|                                               | 0.472                       | 0.153                       | 0.241                       | 0.958                       | 0.174                       | 0.011                       | 0.052                       |
| Navy                                          | 0.941<br>(0.804 - 1.101)    | 1.022<br>(0.920 - 1.134)    | 1.030<br>(0.968 - 1.096)    | 1.000<br>(0.921 - 1.086)    | 0.991<br>(0.959 - 1.025)    | 0.989<br>(0.953 - 1.026)    | 1.039<br>(0.989 - 1.091)    |
|                                               | 0.448                       | 0.689                       | 0.353                       | 0.996                       | 0.611                       | 0.542                       | 0.132                       |
| Marine Corps                                  | 0.917<br>(0.766 - 1.097)    | 1.002<br>(0.893 - 1.125)    | 1.024<br>(0.955 - 1.098)    | 0.978<br>(0.892 - 1.072)    | 0.988<br>(0.952 - 1.024)    | 0.989<br>(0.950 - 1.030)    | 0.988<br>(0.934 - 1.045)    |
|                                               | 0.342                       | 0.969                       | 0.504                       | 0.628                       | 0.503                       | 0.596                       | 0.671                       |
| Others and missing                            | 1.153<br>(0.794 - 1.674)    | 0.957<br>(0.726 - 1.261)    | 1.132<br>(0.968 - 1.323)    | 0.957<br>(0.768 - 1.192)    | 1.001<br>(0.917 - 1.094)    | 0.977<br>(0.887 - 1.077)    | 1.078<br>(0.947 - 1.227)    |
|                                               | 0.454                       | 0.754                       | 0.121                       | 0.696                       | 0.976                       | 0.641                       | 0.256                       |
| Age at separation (Q2)                        | 0.914<br>(0.810 - 1.031)    | 0.928*<br>(0.856 - 1.006)   | 1.021<br>(0.974 - 1.071)    | 1.071**<br>(1.007 - 1.139)  | 1.015<br>(0.989 - 1.041)    | 1.006<br>(0.977 - 1.035)    | 0.979<br>(0.942 - 1.018)    |
|                                               | 0.143                       | 0.071                       | 0.381                       | 0.030                       | 0.263                       | 0.712                       | 0.290                       |
| Age at separation (Q3)                        | 0.930<br>(0.817 - 1.058)    | 0.902**<br>(0.831 - 0.979)  | 1.032<br>(0.983 - 1.083)    | 1.016<br>(0.954 - 1.083)    | 0.993<br>(0.967 - 1.020)    | 0.986<br>(0.957 - 1.016)    | 0.985<br>(0.947 - 1.024)    |
|                                               | 0.268                       | 0.013                       | 0.212                       | 0.618                       | 0.608                       | 0.350                       | 0.437                       |
| Age at separation (Q4)                        | 0.858**<br>(0.747 - 0.986)  | 0.868***<br>(0.797 - 0.946) | 0.942**<br>(0.894 - 0.993)  | 0.970<br>(0.906 - 1.038)    | 1.007<br>(0.980 - 1.034)    | 1.007<br>(0.977 - 1.038)    | 0.941***<br>(0.903 - 0.980) |
|                                               | 0.030                       | 0.001                       | 0.026                       | 0.374                       | 0.620                       | 0.656                       | 0.003                       |
| Dishonorable                                  | 0.956<br>(0.539 - 1.697)    | 1.123<br>(0.822 - 1.536)    | 1.012<br>(0.813 - 1.260)    | 1.107<br>(0.852 - 1.440)    | 0.870**<br>(0.781 - 0.971)  | 0.918<br>(0.809 - 1.041)    | 1.176*<br>(0.992 - 1.394)   |
|                                               | 0.879                       | 0.465                       | 0.913                       | 0.446                       | 0.013                       | 0.183                       | 0.062                       |
| Other discharge                               | 0.845<br>(0.686 - 1.040)    | 1.159***<br>(1.056 - 1.271) | 1.072**<br>(1.009 - 1.139)  | 1.132***<br>(1.053 - 1.217) | 0.948***<br>(0.916 - 0.981) | 0.976<br>(0.941 - 1.012)    | 1.053**<br>(1.002 - 1.106)  |
|                                               | 0.111                       | 0.002                       | 0.025                       | 0.001                       | 0.002                       | 0.184                       | 0.040                       |
| Unknown discharge                             | 0.716<br>(0.420 - 1.220)    | 0.955<br>(0.710 - 1.284)    | 0.937<br>(0.775 - 1.132)    | 0.931<br>(0.728 - 1.192)    | 0.991<br>(0.902 - 1.087)    | 0.947<br>(0.851 - 1.054)    | 0.944<br>(0.821 - 1.086)    |
|                                               | 0.219                       | 0.760                       | 0.497                       | 0.573                       | 0.843                       | 0.317                       | 0.419                       |
| Acquired immune deficiency syndrome           | 0.813<br>(0.521 - 1.268)    | 1.353***<br>(1.095 - 1.672) | 1.168**<br>(1.026 - 1.330)  | 1.195**<br>(1.013 - 1.410)  | 1.200***<br>(1.107 - 1.301) | 0.983<br>(0.893 - 1.082)    | 1.288***<br>(1.162 - 1.429) |
|                                               | 0.361                       | 0.005                       | 0.019                       | 0.035                       | 0.000                       | 0.721                       | 0.000                       |
| Alcohol disorder                              | 1.286***<br>(1.147 - 1.443) | 1.229***<br>(1.148 - 1.317) | 1.434***<br>(1.375 - 1.495) | 1.264***<br>(1.196 - 1.335) | 1.016<br>(0.993 - 1.039)    | 1.039***<br>(1.014 - 1.065) | 1.080***<br>(1.045 - 1.117) |
|                                               | 0.000                       | 0.000                       | 0.000                       | 0.000                       | 0.178                       | 0.002                       | 0.000                       |
| Anemias due to other nutritional deficiencies | 1.192***<br>(1.049 - 1.353) | 1.163***<br>(1.057 - 1.278) | 1.206***<br>(1.146 - 1.269) | 1.089**<br>(1.017 - 1.166)  | 1.026<br>(0.994 - 1.059)    | 1.008<br>(0.973 - 1.044)    | 1.144***<br>(1.095 - 1.195) |
|                                               | 0.007                       | 0.002                       | 0.000                       | 0.014                       | 0.108                       | 0.662                       | 0.000                       |
| Autoimmune conditions                         | 0.874<br>(0.659 - 1.159)    | 0.987<br>(0.820 - 1.188)    | 1.122**<br>(1.017 - 1.238)  | 0.972<br>(0.844 - 1.119)    | 1.157***<br>(1.095 - 1.221) | 1.031<br>(0.966 - 1.100)    | 1.140***<br>(1.050 - 1.237) |



|                                           |                 |                 |                 |                 |                 |                 |                 |
|-------------------------------------------|-----------------|-----------------|-----------------|-----------------|-----------------|-----------------|-----------------|
|                                           | 0.350           | 0.888           | 0.021           | 0.692           | 0.000           | 0.355           | 0.002           |
| Chronic blood loss (iron deficiency)      | 1.328*          | 1.201           | 0.940           | 0.992           | 0.977           | 0.990           | 0.952           |
|                                           | (0.979 - 1.802) | (0.909 - 1.586) | (0.811 - 1.089) | (0.795 - 1.239) | (0.890 - 1.073) | (0.885 - 1.107) | (0.834 - 1.086) |
|                                           | 0.068           | 0.198           | 0.409           | 0.946           | 0.628           | 0.857           | 0.461           |
| Leukemia                                  | 1.746**         | 1.034           | 1.088           | 0.666           | 1.018           | 1.016           | 0.966           |
|                                           | (1.068 - 2.855) | (0.496 - 2.157) | (0.761 - 1.556) | (0.349 - 1.274) | (0.835 - 1.241) | (0.811 - 1.272) | (0.717 - 1.302) |
|                                           | 0.026           | 0.929           | 0.645           | 0.219           | 0.858           | 0.892           | 0.821           |
| Lymphoma                                  | 0.569**         | 0.445**         | 0.952           | 0.770           | 1.002           | 0.881           | 1.132           |
|                                           | (0.328 - 0.987) | (0.210 - 0.942) | (0.761 - 1.191) | (0.519 - 1.142) | (0.873 - 1.151) | (0.746 - 1.040) | (0.951 - 1.348) |
|                                           | 0.045           | 0.034           | 0.668           | 0.193           | 0.975           | 0.134           | 0.164           |
| Metastatic cancer                         | 2.445***        | 0.704           | 1.325***        | 0.667*          | 1.108           | 0.834**         | 1.222**         |
|                                           | (1.779 - 3.361) | (0.389 - 1.273) | (1.074 - 1.634) | (0.441 - 1.008) | (0.967 - 1.271) | (0.704 - 0.989) | (1.025 - 1.456) |
|                                           | 0.000           | 0.246           | 0.008           | 0.055           | 0.141           | 0.037           | 0.025           |
| Solid tumor without metastasis, in situ   | 1.022           | 0.994           | 0.998           | 1.079           | 1.070**         | 0.962           | 1.032           |
|                                           | (0.807 - 1.293) | (0.761 - 1.298) | (0.877 - 1.135) | (0.896 - 1.299) | (1.003 - 1.142) | (0.887 - 1.043) | (0.928 - 1.148) |
|                                           | 0.859           | 0.965           | 0.971           | 0.422           | 0.041           | 0.349           | 0.558           |
| Solid tumor without metastasis, malignant | 1.398***        | 0.984           | 1.082*          | 0.962           | 1.089***        | 0.970           | 1.113***        |
|                                           | (1.185 - 1.649) | (0.817 - 1.186) | (0.993 - 1.179) | (0.848 - 1.090) | (1.039 - 1.140) | (0.914 - 1.028) | (1.035 - 1.197) |
|                                           | 0.000           | 0.869           | 0.073           | 0.542           | 0.000           | 0.304           | 0.004           |
| Cerebrovascular disease - Primary         | 1.210***        | 1.021           | 1.192***        | 1.109***        | 1.067***        | 1.008           | 1.135***        |
|                                           | (1.077 - 1.359) | (0.942 - 1.107) | (1.139 - 1.247) | (1.045 - 1.177) | (1.039 - 1.095) | (0.979 - 1.038) | (1.093 - 1.179) |
|                                           | 0.001           | 0.613           | 0.000           | 0.001           | 0.000           | 0.606           | 0.000           |
| Cerebrovascular disease - Sequela         | 0.889           | 0.845           | 0.975           | 1.086           | 0.997           | 1.045           | 1.030           |
|                                           | (0.661 - 1.196) | (0.653 - 1.094) | (0.856 - 1.111) | (0.900 - 1.312) | (0.919 - 1.081) | (0.955 - 1.145) | (0.921 - 1.151) |
|                                           | 0.437           | 0.201           | 0.704           | 0.390           | 0.936           | 0.338           | 0.603           |
| Coagulopathy                              | 1.256**         | 0.843**         | 1.197***        | 1.010           | 1.107***        | 1.020           | 1.144***        |
|                                           | (1.054 - 1.497) | (0.722 - 0.984) | (1.109 - 1.292) | (0.908 - 1.123) | (1.051 - 1.166) | (0.963 - 1.079) | (1.066 - 1.228) |
|                                           | 0.011           | 0.031           | 0.000           | 0.853           | 0.000           | 0.503           | 0.000           |
| Dementia                                  | 1.065           | 0.960           | 1.042           | 1.063           | 0.912***        | 0.929**         | 1.034           |
|                                           | (0.893 - 1.270) | (0.804 - 1.145) | (0.958 - 1.133) | (0.945 - 1.196) | (0.866 - 0.960) | (0.876 - 0.986) | (0.960 - 1.113) |
|                                           | 0.483           | 0.650           | 0.340           | 0.308           | 0.000           | 0.015           | 0.379           |
| Depression                                | 0.930           | 1.098**         | 0.982           | 0.921***        | 1.085***        | 1.112***        | 1.034**         |
|                                           | (0.833 - 1.038) | (1.020 - 1.183) | (0.940 - 1.026) | (0.869 - 0.976) | (1.062 - 1.109) | (1.085 - 1.139) | (1.000 - 1.069) |
|                                           | 0.194           | 0.013           | 0.418           | 0.005           | 0.000           | 0.000           | 0.048           |
| Diabetes with chronic complications       | 1.329***        | 0.977           | 1.059*          | 0.905**         | 1.105***        | 0.964*          | 1.132***        |
|                                           | (1.140 - 1.551) | (0.862 - 1.107) | (0.991 - 1.132) | (0.825 - 0.993) | (1.066 - 1.144) | (0.925 - 1.004) | (1.073 - 1.194) |
|                                           | 0.000           | 0.717           | 0.089           | 0.035           | 0.000           | 0.077           | 0.000           |
| Diabetes without chronic complications    | 0.987           | 1.009           | 1.011           | 1.085**         | 1.009           | 1.033*          | 0.989           |
|                                           | (0.851 - 1.144) | (0.906 - 1.124) | (0.952 - 1.074) | (1.000 - 1.177) | (0.978 - 1.042) | (0.996 - 1.072) | (0.941 - 1.038) |
|                                           | 0.858           | 0.867           | 0.714           | 0.049           | 0.568           | 0.080           | 0.643           |
| Drug use disorder                         | 0.976           | 1.102***        | 1.283***        | 1.324***        | 1.054***        | 1.073***        | 1.151***        |
|                                           | (0.864 - 1.103) | (1.027 - 1.184) | (1.229 - 1.339) | (1.252 - 1.401) | (1.029 - 1.080) | (1.046 - 1.102) | (1.112 - 1.192) |
|                                           | 0.700           | 0.007           | 0.000           | 0.000           | 0.000           | 0.000           | 0.000           |
| Fluid and electrolyte disorders           | 1.296***        | 1.070           | 1.376***        | 1.149***        | 1.034**         | 1.002           | 1.313***        |
|                                           | (1.145 - 1.468) | (0.984 - 1.164) | (1.314 - 1.441) | (1.081 - 1.221) | (1.005 - 1.064) | (0.970 - 1.034) | (1.261 - 1.366) |
|                                           | 0.000           | 0.114           | 0.000           | 0.000           | 0.022           | 0.924           | 0.000           |
| Heart failure                             | 1.511***        | 1.035           | 1.153***        | 0.902*          | 1.076***        | 0.954*          | 1.069**         |

|                                                  |                 |                 |                 |                 |                 |                 |                 |
|--------------------------------------------------|-----------------|-----------------|-----------------|-----------------|-----------------|-----------------|-----------------|
|                                                  | (1.293 - 1.766) | (0.890 - 1.204) | (1.073 - 1.240) | (0.808 - 1.006) | (1.030 - 1.124) | (0.905 - 1.006) | (1.003 - 1.140) |
|                                                  | 0.000           | 0.655           | 0.000           | 0.064           | 0.001           | 0.085           | 0.039           |
| Homeless                                         | 0.928           | 0.957           | 1.179***        | 1.221***        | 0.983           | 1.046***        | 1.180***        |
|                                                  | (0.824 - 1.045) | (0.895 - 1.023) | (1.133 - 1.228) | (1.161 - 1.285) | (0.960 - 1.006) | (1.019 - 1.073) | (1.141 - 1.219) |
|                                                  | 0.219           | 0.199           | 0.000           | 0.000           | 0.146           | 0.001           | 0.000           |
| Hypertension, complicated                        | 1.176**         | 1.093           | 1.124***        | 1.053           | 0.973           | 0.954**         | 1.079**         |
|                                                  | (1.006 - 1.376) | (0.958 - 1.247) | (1.052 - 1.201) | (0.959 - 1.155) | (0.935 - 1.013) | (0.911 - 1.000) | (1.018 - 1.144) |
| Hypertension, uncomplicated                      | 0.042           | 0.188           | 0.001           | 0.278           | 0.178           | 0.049           | 0.010           |
|                                                  | 0.970           | 0.985           | 1.113***        | 1.060**         | 1.068***        | 0.970**         | 1.048***        |
|                                                  | (0.869 - 1.082) | (0.918 - 1.058) | (1.068 - 1.161) | (1.004 - 1.119) | (1.044 - 1.091) | (0.946 - 0.994) | (1.014 - 1.084) |
|                                                  | 0.580           | 0.684           | 0.000           | 0.037           | 0.000           | 0.015           | 0.006           |
| Liver disease, mild                              | 1.362***        | 0.994           | 1.203***        | 1.073**         | 1.037**         | 1.002           | 1.175***        |
|                                                  | (1.191 - 1.556) | (0.906 - 1.091) | (1.145 - 1.264) | (1.006 - 1.145) | (1.006 - 1.069) | (0.969 - 1.036) | (1.125 - 1.227) |
|                                                  | 0.000           | 0.906           | 0.000           | 0.033           | 0.020           | 0.917           | 0.000           |
| Liver disease and failure,<br>moderate to severe | 1.395**         | 0.997           | 1.026           | 0.878           | 0.928           | 0.935           | 0.987           |
|                                                  | (1.080 - 1.803) | (0.770 - 1.290) | (0.906 - 1.161) | (0.728 - 1.060) | (0.846 - 1.017) | (0.845 - 1.035) | (0.878 - 1.109) |
|                                                  | 0.011           | 0.980           | 0.689           | 0.176           | 0.110           | 0.194           | 0.822           |
| Liver disease                                    | 2.199***        | 1.473           | 1.282*          | 0.996           | 1.119           | 1.057           | 1.048           |
|                                                  | (1.285 - 3.763) | (0.924 - 2.350) | (0.980 - 1.676) | (0.670 - 1.480) | (0.931 - 1.345) | (0.857 - 1.303) | (0.816 - 1.347) |
|                                                  | 0.004           | 0.104           | 0.070           | 0.983           | 0.233           | 0.606           | 0.712           |
| Chronic pulmonary disease                        | 1.223***        | 1.081**         | 1.087***        | 1.015           | 1.091***        | 1.035**         | 1.107***        |
|                                                  | (1.100 - 1.360) | (1.001 - 1.168) | (1.041 - 1.134) | (0.959 - 1.074) | (1.065 - 1.118) | (1.006 - 1.064) | (1.069 - 1.148) |
|                                                  | 0.000           | 0.048           | 0.000           | 0.602           | 0.000           | 0.016           | 0.000           |
| Neurological disorders<br>affecting movement     | 0.819*          | 1.021           | 1.050           | 1.198***        | 1.046*          | 1.101***        | 1.103***        |
|                                                  | (0.654 - 1.026) | (0.878 - 1.187) | (0.962 - 1.146) | (1.075 - 1.334) | (0.996 - 1.099) | (1.042 - 1.164) | (1.027 - 1.186) |
|                                                  | 0.083           | 0.786           | 0.272           | 0.001           | 0.075           | 0.001           | 0.008           |
| Other neurological disorders                     | 1.068           | 1.062           | 0.995           | 1.039           | 1.085***        | 1.034           | 1.019           |
|                                                  | (0.925 - 1.232) | (0.953 - 1.185) | (0.936 - 1.058) | (0.959 - 1.127) | (1.046 - 1.125) | (0.992 - 1.078) | (0.966 - 1.074) |
|                                                  | 0.372           | 0.278           | 0.869           | 0.348           | 0.000           | 0.114           | 0.490           |
| Seizures and epilepsy                            | 1.111           | 1.048           | 1.080**         | 0.969           | 1.054**         | 1.007           | 1.079***        |
|                                                  | (0.930 - 1.327) | (0.934 - 1.176) | (1.012 - 1.153) | (0.891 - 1.055) | (1.012 - 1.098) | (0.964 - 1.052) | (1.019 - 1.144) |
|                                                  | 0.248           | 0.423           | 0.021           | 0.473           | 0.011           | 0.760           | 0.010           |
| Obesity                                          | 0.872**         | 1.081**         | 1.018           | 0.981           | 1.115***        | 1.094***        | 1.088***        |
|                                                  | (0.774 - 0.982) | (1.006 - 1.162) | (0.976 - 1.063) | (0.928 - 1.037) | (1.089 - 1.142) | (1.066 - 1.124) | (1.051 - 1.126) |
|                                                  | 0.024           | 0.035           | 0.401           | 0.503           | 0.000           | 0.000           | 0.000           |
| Paralysis                                        | 1.188           | 1.222*          | 1.071           | 0.772***        | 1.006           | 0.870***        | 0.988           |
|                                                  | (0.880 - 1.605) | (0.965 - 1.549) | (0.938 - 1.223) | (0.635 - 0.939) | (0.924 - 1.096) | (0.794 - 0.954) | (0.882 - 1.106) |
|                                                  | 0.260           | 0.097           | 0.309           | 0.010           | 0.890           | 0.003           | 0.833           |
| Peripheral vascular disease                      | 1.123*          | 1.043           | 1.101***        | 0.970           | 1.065***        | 1.014           | 1.089***        |
|                                                  | (0.979 - 1.288) | (0.912 - 1.192) | (1.032 - 1.175) | (0.880 - 1.069) | (1.025 - 1.105) | (0.969 - 1.061) | (1.031 - 1.150) |
|                                                  | 0.099           | 0.539           | 0.004           | 0.537           | 0.001           | 0.549           | 0.002           |
| Psychoses                                        | 0.999           | 1.084**         | 1.165***        | 1.391***        | 1.063***        | 1.159***        | 1.114***        |
|                                                  | (0.898 - 1.112) | (1.018 - 1.156) | (1.122 - 1.211) | (1.323 - 1.463) | (1.041 - 1.085) | (1.133 - 1.186) | (1.081 - 1.149) |
|                                                  | 0.988           | 0.013           | 0.000           | 0.000           | 0.000           | 0.000           | 0.000           |
| Pulmonary circulation disease                    | 1.395***        | 0.928           | 1.159***        | 0.835**         | 1.032           | 1.019           | 1.051           |
|                                                  | (1.137 - 1.713) | (0.742 - 1.161) | (1.040 - 1.291) | (0.702 - 0.994) | (0.961 - 1.108) | (0.940 - 1.105) | (0.953 - 1.159) |
|                                                  | 0.001           | 0.513           | 0.007           | 0.042           | 0.382           | 0.645           | 0.317           |

|                                              |                             |                             |                             |                             |                             |                             |                             |
|----------------------------------------------|-----------------------------|-----------------------------|-----------------------------|-----------------------------|-----------------------------|-----------------------------|-----------------------------|
| Renal (kidney) failure and disease, moderate | 1.096<br>(0.928 - 1.293)    | 0.869<br>(0.732 - 1.031)    | 1.036<br>(0.957 - 1.121)    | 0.962<br>(0.857 - 1.079)    | 1.010<br>(0.964 - 1.059)    | 1.027<br>(0.973 - 1.085)    | 1.036<br>(0.968 - 1.110)    |
|                                              | 0.281                       | 0.106                       | 0.382                       | 0.504                       | 0.674                       | 0.336                       | 0.309                       |
| Renal (kidney) failure and disease, severe   | 1.970***<br>(1.537 - 2.526) | 0.777<br>(0.525 - 1.149)    | 1.292***<br>(1.127 - 1.480) | 0.676**<br>(0.496 - 0.919)  | 1.067<br>(0.966 - 1.179)    | 0.961<br>(0.856 - 1.078)    | 1.079<br>(0.952 - 1.223)    |
|                                              | 0.000                       | 0.206                       | 0.000                       | 0.013                       | 0.199                       | 0.499                       | 0.235                       |
| Renal failure                                | 0.876<br>(0.655 - 1.171)    | 1.040<br>(0.799 - 1.353)    | 0.970<br>(0.849 - 1.108)    | 1.178*<br>(0.977 - 1.420)   | 1.006<br>(0.925 - 1.094)    | 0.992<br>(0.900 - 1.093)    | 1.079<br>(0.963 - 1.208)    |
|                                              | 0.372                       | 0.773                       | 0.652                       | 0.087                       | 0.895                       | 0.868                       | 0.189                       |
| Hypothyroidism                               | 0.975<br>(0.832 - 1.144)    | 1.055<br>(0.942 - 1.182)    | 1.031<br>(0.967 - 1.100)    | 1.107**<br>(1.017 - 1.204)  | 1.076***<br>(1.038 - 1.115) | 1.085***<br>(1.041 - 1.131) | 1.006<br>(0.953 - 1.062)    |
|                                              | 0.760                       | 0.355                       | 0.347                       | 0.018                       | 0.000                       | 0.000                       | 0.828                       |
| Other thyroid disorders                      | 1.099<br>(0.811 - 1.489)    | 1.051<br>(0.850 - 1.300)    | 1.013<br>(0.902 - 1.138)    | 0.797***<br>(0.673 - 0.944) | 1.068*<br>(0.999 - 1.142)   | 1.035<br>(0.958 - 1.118)    | 1.165***<br>(1.058 - 1.282) |
|                                              | 0.543                       | 0.647                       | 0.827                       | 0.009                       | 0.055                       | 0.380                       | 0.002                       |
| Peptic ulcer with bleeding                   | 1.114<br>(0.837 - 1.482)    | 1.191<br>(0.958 - 1.480)    | 1.053<br>(0.929 - 1.195)    | 1.008<br>(0.850 - 1.196)    | 0.957<br>(0.882 - 1.038)    | 0.984<br>(0.901 - 1.076)    | 1.104*<br>(0.992 - 1.229)   |
|                                              | 0.459                       | 0.116                       | 0.420                       | 0.924                       | 0.287                       | 0.729                       | 0.069                       |
| Valvular disease                             | 1.133<br>(0.945 - 1.359)    | 0.811*<br>(0.657 - 1.000)   | 1.001<br>(0.910 - 1.101)    | 0.968<br>(0.842 - 1.112)    | 1.071**<br>(1.010 - 1.136)  | 1.033<br>(0.963 - 1.107)    | 1.107**<br>(1.021 - 1.202)  |
|                                              | 0.178                       | 0.050                       | 0.982                       | 0.641                       | 0.022                       | 0.363                       | 0.014                       |
| Weight loss                                  | 1.138<br>(0.969 - 1.336)    | 1.071<br>(0.941 - 1.219)    | 1.063*<br>(0.992 - 1.139)   | 1.016<br>(0.922 - 1.119)    | 1.008<br>(0.965 - 1.052)    | 0.942**<br>(0.897 - 0.989)  | 1.053*<br>(0.990 - 1.119)   |
|                                              | 0.116                       | 0.300                       | 0.083                       | 0.752                       | 0.727                       | 0.016                       | 0.099                       |
| Past-year inpatient mental health care use   | 0.880*<br>(0.763 - 1.015)   | 1.473***<br>(1.365 - 1.590) | 1.718***<br>(1.643 - 1.797) | 2.532***<br>(2.390 - 2.682) | 1.058***<br>(1.029 - 1.087) | 1.162***<br>(1.129 - 1.197) | 1.419***<br>(1.366 - 1.473) |
|                                              | 0.079                       | 0.000                       | 0.000                       | 0.000                       | 0.000                       | 0.000                       | 0.000                       |
| Past-year outpatient mental health care use  | 0.814***<br>(0.717 - 0.923) | 1.209***<br>(1.087 - 1.345) | 1.230***<br>(1.156 - 1.308) | 1.347***<br>(1.227 - 1.478) | 1.604***<br>(1.559 - 1.650) | 2.235***<br>(2.159 - 2.314) | 1.367***<br>(1.306 - 1.432) |
|                                              | 0.001                       | 0.000                       | 0.000                       | 0.000                       | 0.000                       | 0.000                       | 0.000                       |
| Past-year suicide attempt                    | 0.985<br>(0.838 - 1.157)    | 4.298***<br>(4.015 - 4.600) | 1.353***<br>(1.288 - 1.420) | 1.502***<br>(1.418 - 1.592) | 1.168***<br>(1.133 - 1.203) | 1.269***<br>(1.230 - 1.309) | 1.145***<br>(1.099 - 1.194) |
|                                              | 0.850                       | 0.000                       | 0.000                       | 0.000                       | 0.000                       | 0.000                       | 0.000                       |
| 2019                                         | 0.830***<br>(0.725 - 0.951) | 1.113**<br>(1.020 - 1.214)  | 0.927***<br>(0.881 - 0.975) | 0.926**<br>(0.867 - 0.989)  | 0.983<br>(0.956 - 1.010)    | 0.942***<br>(0.914 - 0.971) | 0.876***<br>(0.841 - 0.913) |
|                                              | 0.007                       | 0.016                       | 0.004                       | 0.023                       | 0.220                       | 0.000                       | 0.000                       |
| 2020                                         | 0.896<br>(0.678 - 1.184)    | 1.199**<br>(1.009 - 1.425)  | 0.829***<br>(0.746 - 0.921) | 0.856**<br>(0.746 - 0.982)  | 0.956<br>(0.903 - 1.013)    | 0.857***<br>(0.805 - 0.914) | 0.740***<br>(0.680 - 0.805) |
|                                              | 0.440                       | 0.039                       | 0.000                       | 0.027                       | 0.127                       | 0.000                       | 0.000                       |
| 2021                                         | 0.832<br>(0.525 - 1.318)    | 1.208<br>(0.913 - 1.599)    | 0.886<br>(0.748 - 1.051)    | 0.884<br>(0.706 - 1.107)    | 1.126**<br>(1.029 - 1.232)  | 1.022<br>(0.923 - 1.132)    | 0.732***<br>(0.639 - 0.838) |
|                                              | 0.434                       | 0.186                       | 0.164                       | 0.281                       | 0.010                       | 0.669                       | 0.000                       |
| February                                     | 0.961<br>(0.762 - 1.212)    | 1.154*<br>(0.999 - 1.332)   | 0.989<br>(0.905 - 1.080)    | 0.957<br>(0.853 - 1.074)    | 1.047*<br>(0.998 - 1.098)   | 1.024<br>(0.971 - 1.080)    | 1.030<br>(0.960 - 1.106)    |
|                                              | 0.739                       | 0.051                       | 0.806                       | 0.454                       | 0.061                       | 0.390                       | 0.407                       |
| March                                        | 1.030<br>(0.796 - 1.332)    | 0.960<br>(0.805 - 1.146)    | 1.059<br>(0.959 - 1.169)    | 1.009<br>(0.884 - 1.151)    | 1.054*<br>(1.000 - 1.112)   | 1.076**<br>(1.014 - 1.142)  | 0.958<br>(0.884 - 1.037)    |

|              |                 |                 |                 |                 |                 |                 |                 |
|--------------|-----------------|-----------------|-----------------|-----------------|-----------------|-----------------|-----------------|
|              | 0.824           | 0.655           | 0.259           | 0.895           | 0.051           | 0.015           | 0.286           |
| April        | 0.928           | 1.119           | 1.012           | 1.010           | 0.995           | 1.048           | 0.955           |
|              | (0.706 - 1.220) | (0.942 - 1.331) | (0.914 - 1.121) | (0.884 - 1.155) | (0.941 - 1.051) | (0.987 - 1.114) | (0.880 - 1.036) |
|              | 0.593           | 0.201           | 0.814           | 0.880           | 0.846           | 0.127           | 0.265           |
| May          | 0.809           | 1.113           | 1.068           | 1.026           | 1.019           | 1.023           | 0.996           |
|              | (0.612 - 1.070) | (0.936 - 1.322) | (0.965 - 1.181) | (0.898 - 1.172) | (0.966 - 1.075) | (0.964 - 1.086) | (0.918 - 1.080) |
|              | 0.138           | 0.225           | 0.202           | 0.710           | 0.483           | 0.445           | 0.914           |
| June         | 1.074           | 1.224**         | 0.996           | 1.028           | 0.999           | 0.985           | 0.919**         |
|              | (0.836 - 1.380) | (1.043 - 1.437) | (0.906 - 1.095) | (0.907 - 1.164) | (0.950 - 1.052) | (0.930 - 1.043) | (0.851 - 0.992) |
|              | 0.578           | 0.013           | 0.934           | 0.668           | 0.982           | 0.600           | 0.031           |
| July         | 0.871           | 0.972           | 0.908**         | 0.917           | 1.009           | 0.966           | 0.875***        |
|              | (0.671 - 1.129) | (0.823 - 1.147) | (0.824 - 1.000) | (0.808 - 1.040) | (0.958 - 1.062) | (0.912 - 1.023) | (0.810 - 0.945) |
|              | 0.297           | 0.734           | 0.049           | 0.177           | 0.740           | 0.231           | 0.001           |
| August       | 0.854           | 1.005           | 0.921*          | 0.946           | 0.981           | 0.952*          | 0.888***        |
|              | (0.657 - 1.111) | (0.851 - 1.187) | (0.836 - 1.016) | (0.833 - 1.074) | (0.932 - 1.033) | (0.899 - 1.008) | (0.821 - 0.959) |
|              | 0.240           | 0.952           | 0.099           | 0.391           | 0.462           | 0.092           | 0.003           |
| September    | 0.907           | 0.993           | 0.968           | 0.942           | 1.024           | 1.003           | 0.925**         |
|              | (0.697 - 1.180) | (0.839 - 1.175) | (0.878 - 1.067) | (0.828 - 1.072) | (0.971 - 1.079) | (0.946 - 1.063) | (0.856 - 1.000) |
|              | 0.468           | 0.932           | 0.511           | 0.367           | 0.380           | 0.930           | 0.049           |
| October      | 0.903           | 1.198**         | 0.949           | 0.961           | 0.992           | 0.980           | 0.881***        |
|              | (0.693 - 1.176) | (1.016 - 1.413) | (0.860 - 1.046) | (0.845 - 1.092) | (0.941 - 1.046) | (0.924 - 1.039) | (0.815 - 0.953) |
|              | 0.449           | 0.032           | 0.293           | 0.539           | 0.769           | 0.497           | 0.002           |
| November     | 0.944           | 1.025           | 0.892**         | 0.932           | 0.982           | 0.937**         | 0.851***        |
|              | (0.721 - 1.236) | (0.864 - 1.216) | (0.806 - 0.988) | (0.817 - 1.064) | (0.931 - 1.036) | (0.883 - 0.994) | (0.785 - 0.923) |
|              | 0.676           | 0.778           | 0.028           | 0.296           | 0.503           | 0.031           | 0.000           |
| December     | 0.879           | 0.956           | 0.909*          | 0.865**         | 0.937**         | 0.896***        | 0.847***        |
|              | (0.670 - 1.153) | (0.805 - 1.135) | (0.822 - 1.005) | (0.758 - 0.987) | (0.888 - 0.989) | (0.844 - 0.951) | (0.781 - 0.918) |
|              | 0.352           | 0.605           | 0.062           | 0.031           | 0.018           | 0.000           | 0.000           |
| Observations | 44,707          | 44,707          | 44,707          | 44,707          | 44,707          | 44,707          | 44,707          |
| AIC          | 39961           | 99714           | 274066          | 160686          | 839513          | 734485          | 433310          |
| BIC          | 42269           | 102022          | 276374          | 162994          | 841820          | 736793          | 435617          |

Notes: \*\*\* p<0.01, \*\* p<0.05, \* p<0.1; Coefficients are hazard ratios with 95% CI in parentheses, followed by p-value; Robust standard errors were used; Excluded those with age at separation missing due to small cell size.

## References

1. Hannemann CM, Hughes GJ, McCarthy JF, Katz IR. Suicide Mortality Following Veterans Crisis Line Calls by Individuals with Recent Veterans Health Administration (VHA) Use: 2010-2015. AAS Presentation. 2019.
2. Milner AJ, Carter G, Pirkis J, Robinson J, Spittal MJ. Letters, green cards, telephone calls and postcards: systematic and meta-analytic review of brief contact interventions for reducing self-harm, suicide attempts and suicide. *Br J Psychiatry*. 2015;206(3):184-190. doi:10.1192/bjp.bp.114.147819
