# Supplementary material for: Caring Letters Sent by a Clinician or Peer to At-Risk Veterans: A Randomized Clinical Trial
Source: PubMed Central journal article supplement (PMC11059042; doi:10.1001/jamanetworkopen.2024.8064), 2024-04-29
Supplement: jamanetwopen-e248064-s003.pdf [file jamanetwopen-e248064-s003.pdf]

## **Data Sharing Statement**

### **Data**

**Data available:** No

### **Additional Information**

**Explanation for why data not available:** Data sharing may be possible, but this is usually accomplished through the creation of a de-identified data set and the creation of a Data Use Agreement that complies with all applicable laws and regulations
